# Supplementary material for: Understanding the reactivity of carbene-analogous phosphane complexes with group 13 elements as a central atom: a theoretical investigation
Source: Royal Society of Chemistry journal article supplement (doi:10.1039/d0nj01708f), 2020-01-01
Supplement: d0nj01708f1.pdf [file d0nj01708f1.pdf]

## Supporting Information

### Understanding the Reactivity of Carbene-Analogous Phosphane Complexes with Group 13 Elements as a Central Atom: A Theoretical Investigation

Zheng-Feng Zhang<sup>†</sup>, Tsung-Lung Li<sup>\*,‡</sup>, and Ming-Der Su<sup>\*,†,¶</sup>

<sup>†</sup>Department of Applied Chemistry, National Chia-Yi University, Chiayi, Taiwan 60004, Taiwan

<sup>‡</sup>Department of Electrophysics, National Chia-Yi University, Chiayi, Taiwan 60004, Taiwan

<sup>¶</sup>Department of Medicinal and Applied Chemistry, Kaohsiung Medical University, Kaohsiung, Taiwan 80708, Taiwan

\*E-mail: quantum@mail.ncyu.edu.tw (T.-L. Li); midesu@mail.ncyu.edu.tw (M.-D. Su)

#### IRC path animations

The six IRC path animations created in this work are included in this Supporting Information. The animation files are viewable by VLC.

1. The reaction of **0B** with methane:  
See file carb-B-cat-CH4-IRC.mp4
2. The reaction of **0Tl** with methane:  
See file carb-Tl-cat-CH4-IRC.mp4
3. The reaction of **0B** with ethene:  
See file carb-B-cat-C2H4-IRC.mp4
4. The reaction of **0Al** with ethene:  
See file carb-Al-cat-C2H4-IRC.mp4
5. The reaction of **0In** with ethene:  
See file carb-In-cat-C2H4-IRC.mp4
6. The reaction of **0Tl** with ethene:  
See file carb-Tl-cat-C2H4-IRC.mp4

Table S1: The activation energies and reaction enthalpies of the transition states and products of the reactions with methane and ethene are shown in parts (a) and (b), respectively.  $\Delta E$  and  $\Delta G$  are the total and free energies at 298.15 K, respectively.

| (a) Reaction with CH <sub>4</sub> : <b>0M</b> + CH <sub>4</sub> $\rightarrow$ <b>TS1M</b> $\rightarrow$ <b>1M</b> |                              |              |              |              |              |                   |            |            |            |            |
|-------------------------------------------------------------------------------------------------------------------|------------------------------|--------------|--------------|--------------|--------------|-------------------|------------|------------|------------|------------|
| Energy                                                                                                            | Transition State <b>TS1M</b> |              |              |              |              | Product <b>1M</b> |            |            |            |            |
|                                                                                                                   | <b>TS1B</b>                  | <b>TS1Al</b> | <b>TS1Ga</b> | <b>TS1In</b> | <b>TS1Tl</b> | <b>1B</b>         | <b>1Al</b> | <b>1Ga</b> | <b>1In</b> | <b>1Tl</b> |
| $\Delta E$                                                                                                        | 28.37                        | 44.62        | 58.75        | 72.26        | 90.11        | -47.45            | -20.25     | 1.68       | 20.74      | 44.54      |
| $\Delta G$                                                                                                        | 44.32                        | 56.35        | 71.27        | 83.09        | 99.19        | -29.71            | -6.12      | 13.00      | 29.77      | 53.56      |

  

| (b) Reaction with C <sub>2</sub> H <sub>4</sub> : <b>0M</b> + C <sub>2</sub> H <sub>4</sub> $\rightarrow$ <b>TS2M</b> $\rightarrow$ <b>2M</b> |                              |              |              |              |              |                   |            |            |            |            |
|-----------------------------------------------------------------------------------------------------------------------------------------------|------------------------------|--------------|--------------|--------------|--------------|-------------------|------------|------------|------------|------------|
| Energy                                                                                                                                        | Transition State <b>TS2M</b> |              |              |              |              | Product <b>2M</b> |            |            |            |            |
|                                                                                                                                               | <b>TS2B</b>                  | <b>TS2Al</b> | <b>TS2Ga</b> | <b>TS2In</b> | <b>TS2Tl</b> | <b>2B</b>         | <b>2Al</b> | <b>2Ga</b> | <b>2In</b> | <b>2Tl</b> |
| $\Delta E$                                                                                                                                    | 33.81                        | 3.01         | 19.23        | 37.52        | 65.57        | -39.01            | -8.74      | 16.72      | 37.06      | 65.57      |
| $\Delta G$                                                                                                                                    | 50.62                        | 19.15        | 36.39        | 52.74        | 81.05        | -19.26            | 8.87       | 34.65      | 52.69      | 81.05      |

(a) CH<sub>4</sub> REACTION(b) C<sub>2</sub>H<sub>4</sub> REACTION

REACTANT

TRANS. STATE

PRODUCT

TRANS. STATE

PRODUCT

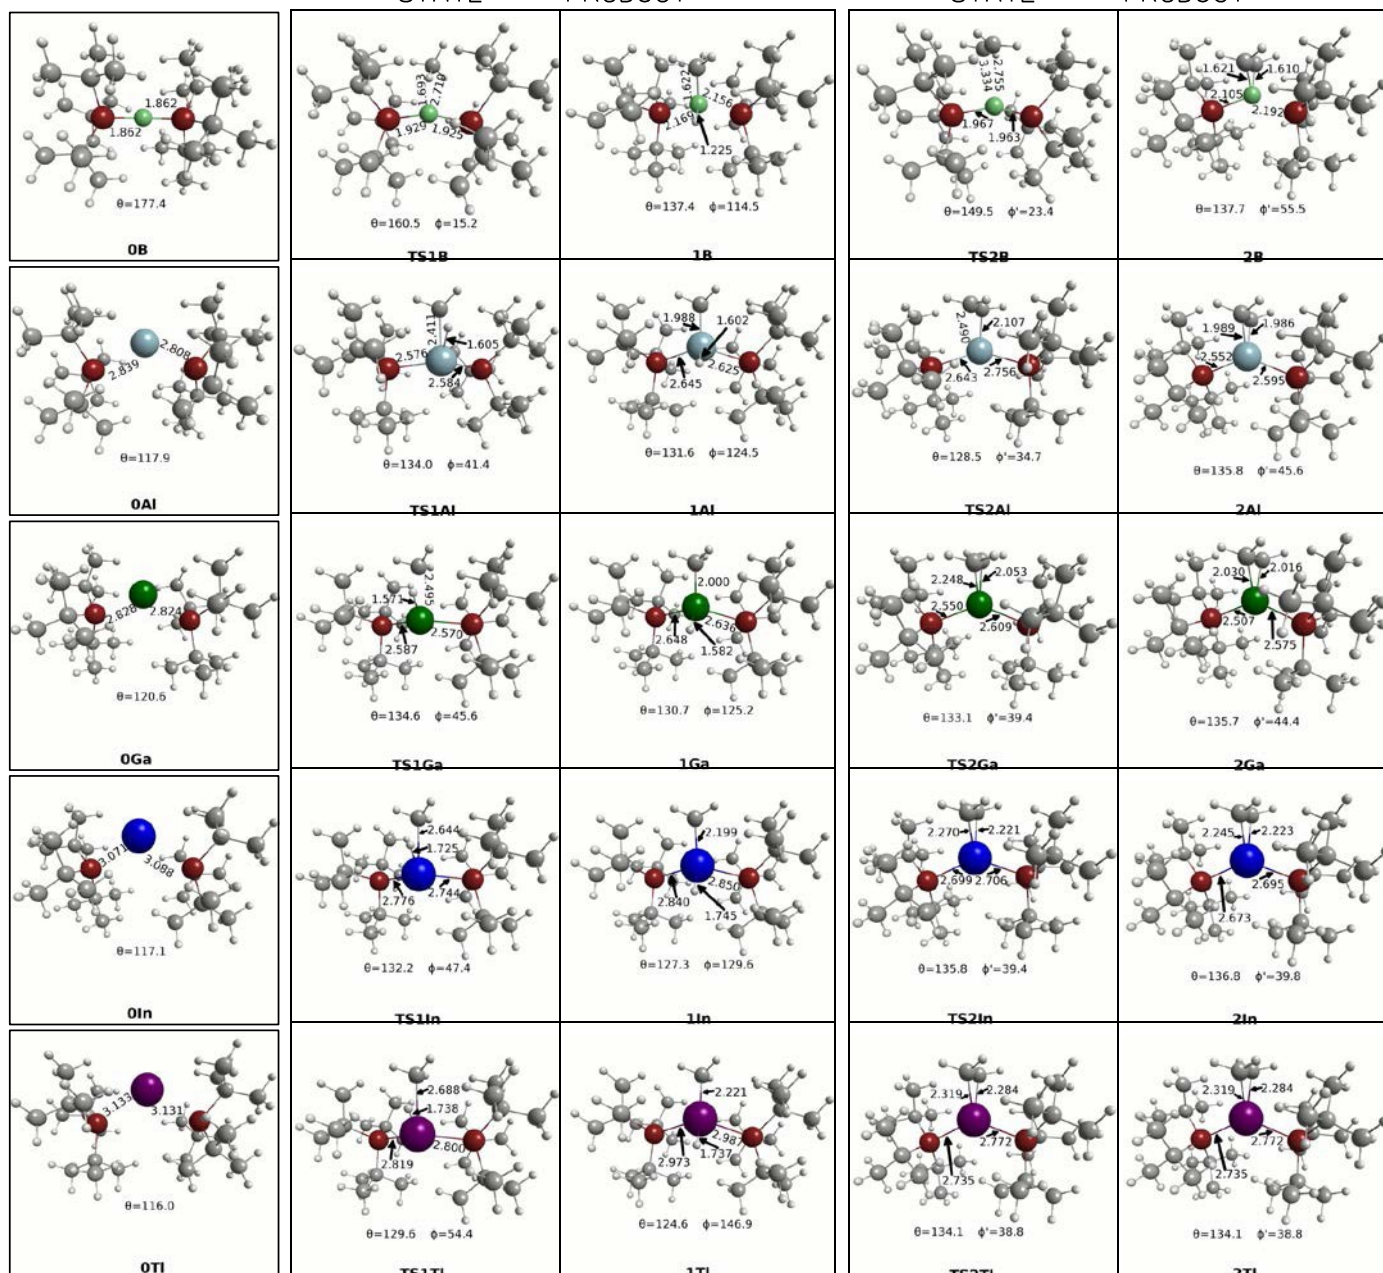

Figure S1: The geometric structures of the reactants, transition states, and products of the reactions with methane and ethene are plotted. The structures of the reactants **0M** are shown in the first column, where **M** = **B**, **Al**, **Ga**, **In**, and **Tl**. The structures of the transition states **TS1M** and products **1M** of the methane reactions are depicted in the second and third columns, respectively. The structures of the transition states **TS2M** and products **2M** of the ethene reactions are illustrated in the fourth and fifth columns, respectively. Some bond lengths and bond angles of importance are labeled, including the lengths of the **M-P<sub>1</sub>** and **M-P<sub>2</sub>** bonds and the bond angles  $\theta$  in between, the lengths of the **M-C** and **M-H** bonds and the bond angles  $\varphi$  in between for **TS1M** and **1M**, and the lengths of the **M-C<sub>1</sub>** and **M-C<sub>2</sub>** bonds and the bond angles  $\varphi'$  in between for **TS2M** and **2M**.

(a) NRT of reactant OB

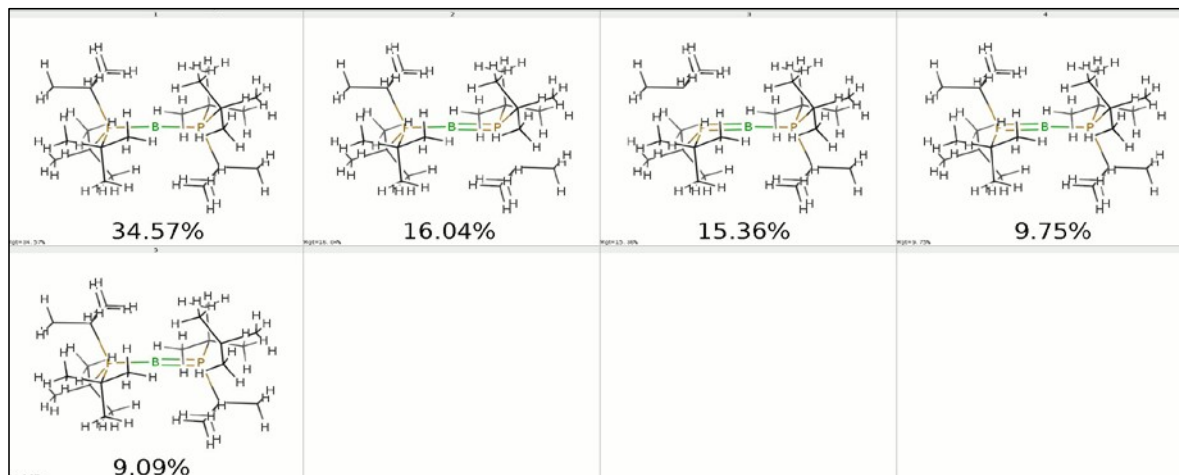

(b) NRT of reactant OAl

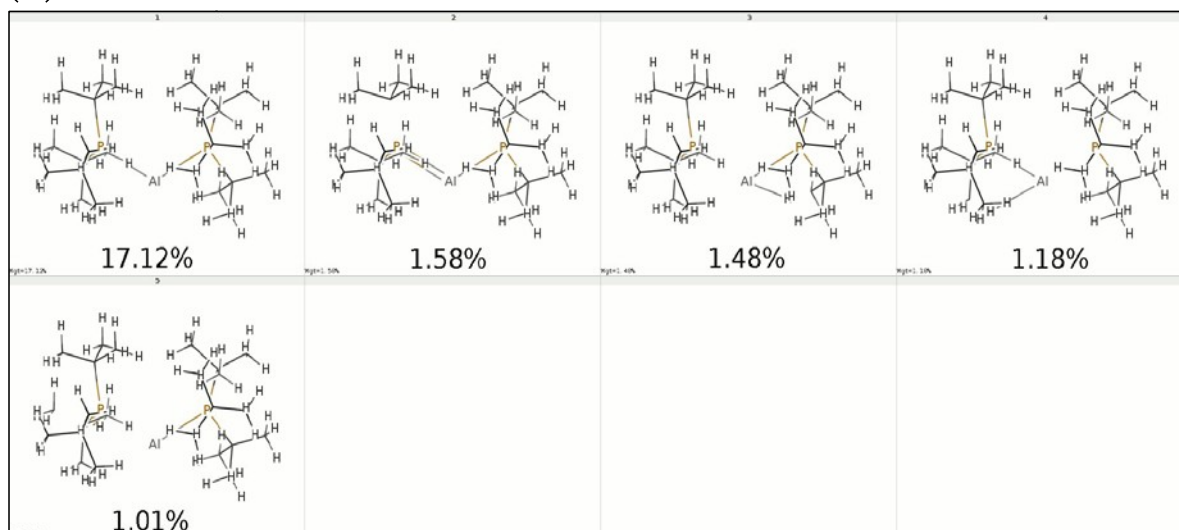

(c) NRT of reactant OGa

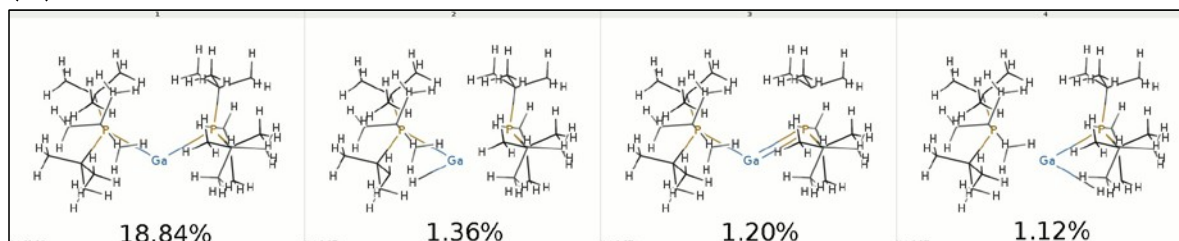

(d) NRT of reactant OIn

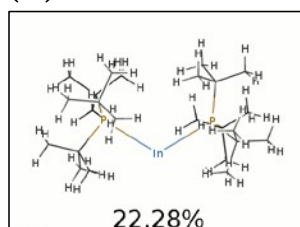

(e) NRT of reactant OTl

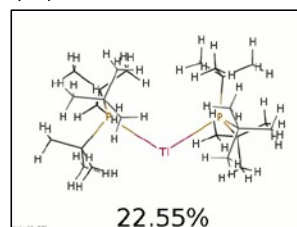

Figure S2: The NRT contributions of the resonance structures of reactants (a) **OB**, (b) **OAl**, (c) **OGa**, (d) **OIn**, and (e) **OTl** are depicted. In all subplots, only the structures with resonance contributions over 1% are shown. The most probable resonance structures of each reactants are employed for the subsequent computations.

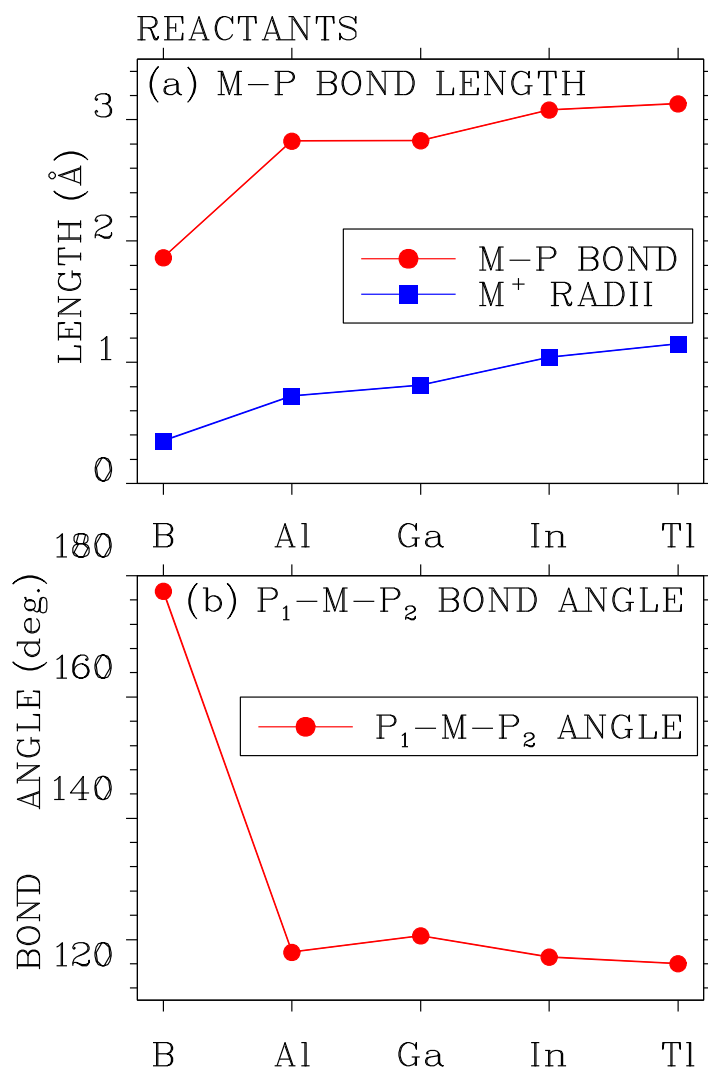

Figure S3: The M-P bond lengths and the bond angles between M-P<sub>1</sub> and M-P<sub>2</sub> bonds are shown in subplots (a) and (b), respectively. The M-P bond lengths depicted in subplot (a) are the length average of bonds M-P<sub>1</sub> and M-P<sub>2</sub>. The radii of the M<sup>+</sup> ions are also plotted for comparison. It can be seen that the difference between the B-P and Al-P bond lengths is much larger than the difference between the radii of the B<sup>+</sup> and Al<sup>+</sup> ions.



(a) CH<sub>4</sub> REACTION(b) C<sub>2</sub>H<sub>4</sub> REACTION

REACTANT

TRANS. STATE

PRODUCT

TRANS. STATE

PRODUCT

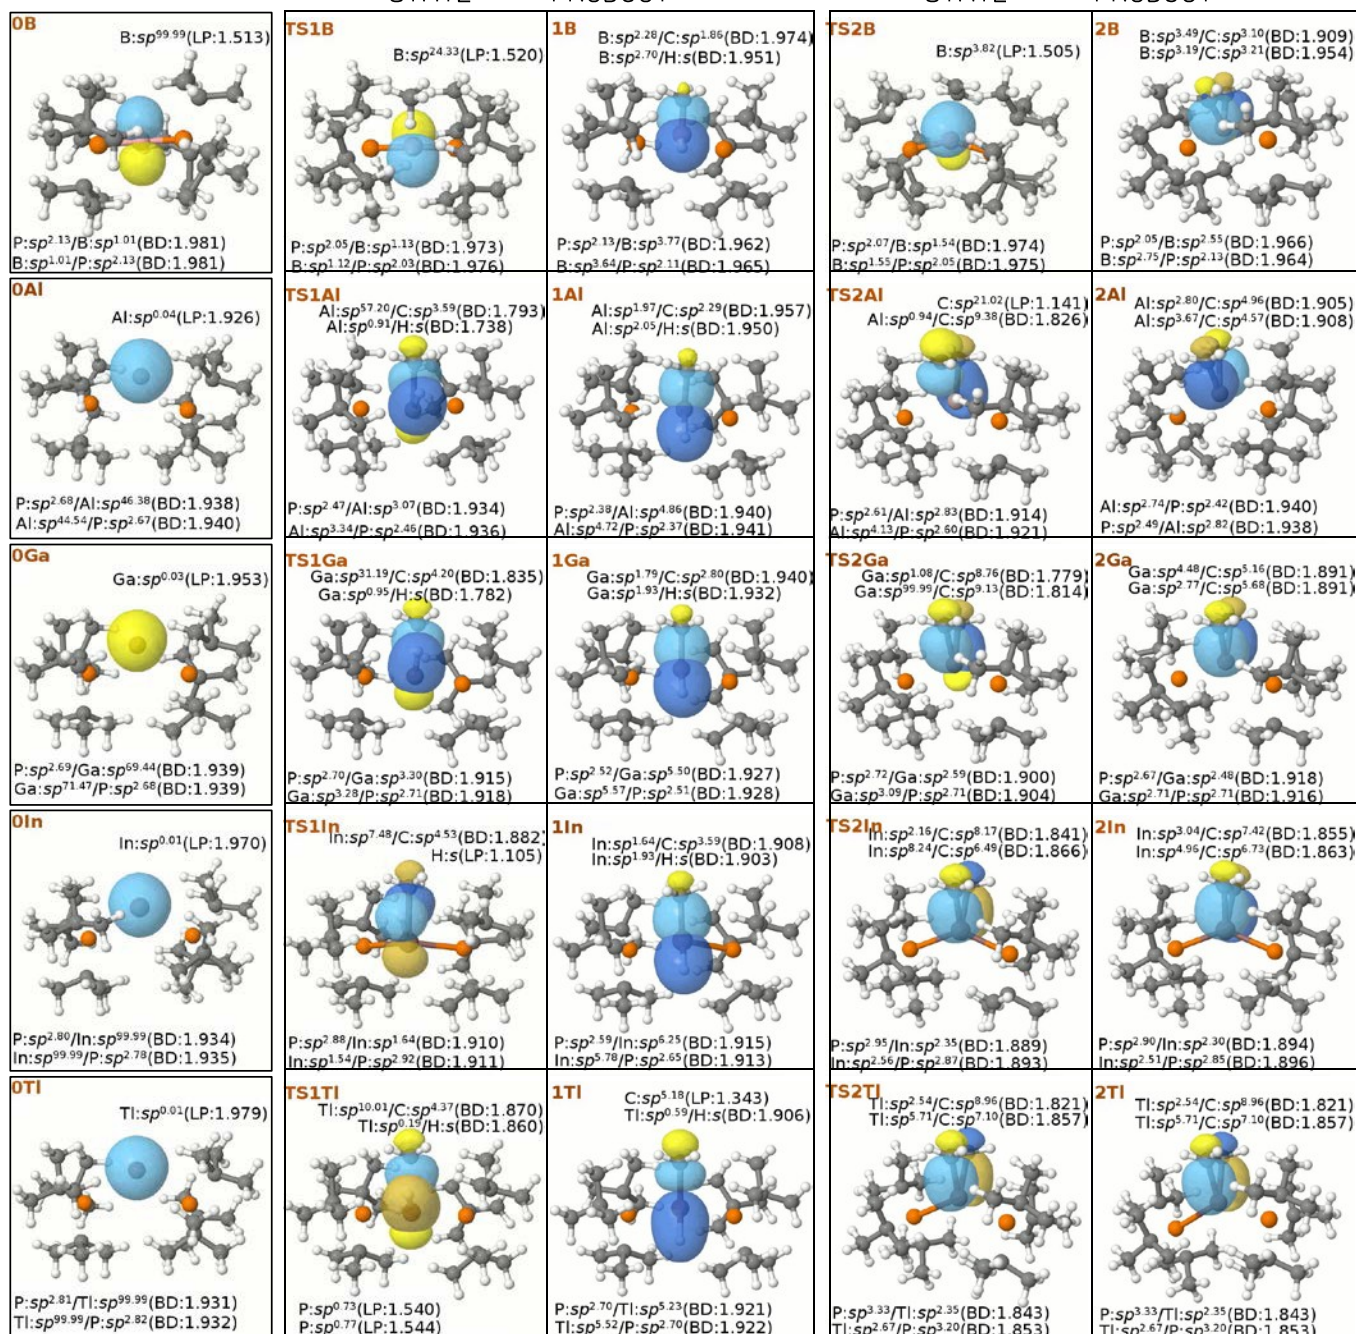

Figure S4: The NBO of the lone pairs of the electrons of atoms M in the reactants **0M** are depicted in the first column of subplots. The NBO of the forming or established bonds between the two molecular fragments of the reactions are shown, including (1) the NBO of the M-C and M-H bonds for transition states **TS1M** and products **1M** of the reactions with methane in the second and third columns, and (2) the NBO of the M-C<sub>1</sub> and M-C<sub>2</sub> bonds for transition states **TS2M** and products **2M** of the reactions with ethene in the fourth and fifth columns, respectively. In each subplot, the orbital contributions of atoms to the NBO of lone pairs and bonds are annotated by LP and BD, respectively. The numbers following LP and BD are the occupation numbers of the NBO. For instance, in subplot **0B**, “B:sp<sup>99.99</sup>(LP:1.513)” means the B atom contributes sp<sup>99.99</sup> orbitals to the LP and the LP has the occupation number of 1.513; “P:sp<sup>2.13</sup>/B:sp<sup>1.01</sup>(BD:1.938)” stands for a P-B bond with the occupation number of 1.938, and the P and B atoms contribute sp<sup>2.13</sup> and sp<sup>1.01</sup> orbitals to the NBO, respectively.

## Structure data

The Cartesian coordinates of the atomic positions of the structures of the reactants (**0B**, **0Al**, **0Ga**, **0In**, and **0TI**), the transition states (**TS1B**, **TS1Al**, **TS1Ga**, **TS1In**, and **TS1TI**) and products (**1B**, **1Al**, **1Ga**, **1In**, and **1TI**) of the reactions with methane, and the transition states (**TS2B**, **TS2Al**, **TS2Ga**, **TS2In**, and **TS2TI**) and products (**2B**, **2Al**, **2Ga**, **2In**, and **2TI**) of the reactions with ethene are listed in the following subsections. The first and second columns of the list are the atomic symbols and atomic numbers, respectively. The last three columns are the (*x*, *y*, *z*) coordinates of the atomic positions in the unit of Å. All structure data are obtained from the output files of the quantum chemistry simulation package GAMESS-US.

## Reactants

### Reactant 0B:

| ATOM | CHARGE | X             | Y             | Z             |
|------|--------|---------------|---------------|---------------|
| P    | 15.0   | 1.8614238580  | 0.0122284832  | 0.0185438442  |
| B    | 5.0    | 0.0001424401  | 0.0454629858  | 0.0105598564  |
| P    | 15.0   | -1.8615054568 | -0.0024068318 | -0.0170750164 |
| C    | 6.0    | 2.2137276439  | 1.0240914985  | -1.6126549333 |
| C    | 6.0    | 3.6019199507  | 0.7507229860  | -2.2253038745 |
| H    | 1.0    | 4.4304190943  | 1.0466036743  | -1.5528284219 |
| H    | 1.0    | 3.6997401354  | 1.3635988734  | -3.1483164186 |
| H    | 1.0    | 3.7499319381  | -0.3030450700 | -2.5252447287 |
| C    | 6.0    | 1.0958796306  | 0.6102299679  | -2.5979684006 |
| H    | 1.0    | 0.0932092209  | 0.7742747204  | -2.1336886364 |
| H    | 1.0    | 1.1680389054  | -0.4404714698 | -2.9315558952 |
| H    | 1.0    | 1.1326979184  | 1.2622512875  | -3.4982832679 |
| C    | 6.0    | 2.0784063772  | 2.5434000585  | -1.3664285533 |
| H    | 1.0    | 2.8812051729  | 2.9541923630  | -0.7259445205 |
| H    | 1.0    | 1.1000679592  | 2.8139901496  | -0.9244785870 |
| H    | 1.0    | 2.1594237319  | 3.0567921917  | -2.3490580348 |
| C    | 6.0    | 2.6447151789  | -1.8055528647 | -0.1340225593 |
| C    | 6.0    | 4.1791906455  | -1.8707727061 | 0.0140302823  |
| H    | 1.0    | 4.5302834974  | -1.5801196233 | 1.0230850892  |
| H    | 1.0    | 4.7168165635  | -1.2569922569 | -0.7342749247 |
| H    | 1.0    | 4.5039861627  | -2.9232924000 | -0.1407886789 |
| C    | 6.0    | 2.2329853283  | -2.4038100818 | -1.4965323860 |
| H    | 1.0    | 1.1351945065  | -2.3584684998 | -1.6444702120 |
| H    | 1.0    | 2.5198363826  | -3.4775281362 | -1.5073172726 |
| H    | 1.0    | 2.7347521808  | -1.9306027965 | -2.3622061174 |
| C    | 6.0    | 1.9716410134  | -2.6825802911 | 0.9449213675  |
| H    | 1.0    | 2.2758791018  | -2.4396653049 | 1.9786920979  |
| H    | 1.0    | 2.2458055123  | -3.7441819594 | 0.7633769202  |
| H    | 1.0    | 0.8661564299  | -2.6130047509 | 0.8730157881  |
| C    | 6.0    | -2.6597941026 | 1.8092793596  | 0.0094846387  |
| C    | 6.0    | -2.6825949053 | -1.0040182836 | -1.5151822487 |
| C    | 6.0    | -2.2475862111 | 2.5006536782  | 1.3269639164  |
| H    | 1.0    | -2.7504669470 | 2.0890995333  | 2.2233122008  |
| H    | 1.0    | -2.5314777496 | 3.5733096526  | 1.2644234800  |
| H    | 1.0    | -1.1490247201 | 2.4574755340  | 1.4754668116  |
| C    | 6.0    | -2.0012826600 | 2.6191681351  | -1.1291033883 |
| H    | 1.0    | -2.2846392335 | 2.2795835466  | -2.1412525166 |
| H    | 1.0    | -0.8959330170 | 2.5965503795  | -1.0380236602 |
| H    | 1.0    | -2.3165995927 | 3.6809307034  | -1.0373098291 |
| C    | 6.0    | -4.1944918734 | 1.8416852747  | -0.1442174970 |
| H    | 1.0    | -4.5347586788 | 1.4667167284  | -1.1289755560 |
| H    | 1.0    | -4.5373899762 | 2.8972538220  | -0.0728398038 |
| H    | 1.0    | -4.7247695645 | 1.2772344519  | 0.6465949184  |
| C    | 6.0    | -2.7568185479 | -0.1490333709 | -2.8010972020 |
| H    | 1.0    | -3.1158800074 | -0.8049790166 | -3.6234800695 |
| H    | 1.0    | -1.7698289079 | 0.2455301317  | -3.1151152913 |
| H    | 1.0    | -3.4697173306 | 0.6941349375  | -2.7293940985 |
| C    | 6.0    | -4.1109323419 | -1.4757578284 | -1.1610537916 |
| H    | 1.0    | -4.5272569393 | -2.0070105870 | -2.0447884750 |
| H    | 1.0    | -4.8007108787 | -0.6424902488 | -0.9310655395 |
| H    | 1.0    | -4.1365052525 | -2.1944323972 | -0.3198257450 |
| C    | 6.0    | -1.7874261095 | -2.2196461479 | -1.8269670921 |
| H    | 1.0    | -2.2472607191 | -2.7946104580 | -2.6599493167 |
| H    | 1.0    | -1.6622737528 | -2.9117212261 | -0.9747071218 |
| H    | 1.0    | -0.7784774886 | -1.9003444197 | -2.1518964864 |
| C    | 6.0    | 2.6941595801  | 0.8955548508  | 1.5782573454  |
| C    | 6.0    | 1.8215353120  | 2.0996694601  | 1.9876355866  |
| H    | 1.0    | 2.3098412741  | 2.6104815056  | 2.8457097360  |
| H    | 1.0    | 0.8136644373  | 1.7772290989  | 3.113724832   |
| H    | 1.0    | 1.6949703015  | 2.8445466139  | 1.1819730205  |
| C    | 6.0    | 2.7793188016  | -0.0580471003 | 2.7922841255  |
| H    | 1.0    | 3.1624911895  | 0.5248037778  | 3.6575060352  |
| H    | 1.0    | 3.4823185894  | -0.8972778019 | 2.6349103244  |
| H    | 1.0    | 1.7951791748  | -0.4688443492 | 3.0929606316  |

|   |     |               |               |              |
|---|-----|---------------|---------------|--------------|
| C | 6.0 | 4.1260443221  | 1.3733060687  | 1.2406602973 |
| H | 1.0 | 4.5656069625  | 1.8182210778  | 2.1599527416 |
| H | 1.0 | 4.1516971519  | 2.1608186392  | 0.4637677443 |
| H | 1.0 | 4.7958970734  | 0.5508744675  | 0.9278061160 |
| C | 6.0 | -2.2131859985 | -0.9119130088 | 1.6767794561 |
| C | 6.0 | -2.0692540420 | -2.4447243579 | 1.5360450387 |
| H | 1.0 | -2.8688203872 | -2.9068676896 | 0.9274384969 |
| H | 1.0 | -2.1456819495 | -2.8833209570 | 2.5540575825 |
| H | 1.0 | -1.0879520136 | -2.7393964576 | 1.1172870467 |
| C | 6.0 | -3.6088211051 | -0.6069986867 | 2.2581414456 |
| C | 1.0 | -3.7136210902 | -1.1735668127 | 3.2093399850 |
| H | 1.0 | -4.4298045997 | -0.9375457333 | 1.5929553028 |
| H | 1.0 | -3.7597259114 | 0.4606313249  | 2.5029263915 |
| C | 6.0 | -1.1092107915 | -0.4351097879 | 2.6480725911 |
| H | 1.0 | -1.1736992199 | 0.6391835756  | 2.8969959931 |
| H | 1.0 | -0.1009406891 | -0.6450635685 | 2.2190013848 |
| H | 1.0 | -1.1753819090 | -1.0124499523 | 3.5965119131 |

### Reactant 0Al:

| ATOM | CHARGE | X             | Y              | Z             |
|------|--------|---------------|----------------|---------------|
| P    | 15.0   | -2.4086983307 | -1.45999990110 | -0.0238054782 |
| AL   | 13.0   | 0.0183267801  | -0.0645174511  | -0.3948273579 |
| P    | 15.0   | 2.4284993006  | -0.0645174511  | -0.0355261722 |
| C    | 6.0    | -3.1721539377 | -0.6432378628  | -1.7162235974 |
| C    | 6.0    | -4.5493623702 | -0.0473420656  | -2.0781652934 |
| H    | 1.0    | -5.3245253152 | -0.2872093413  | -1.3247005178 |
| H    | 1.0    | -4.8829323683 | -0.4866590020  | -3.0438410121 |
| H    | 1.0    | -4.5272873688 | 1.0510084005   | -2.2160295026 |
| C    | 6.0    | -2.1362924081 | -0.2805125770  | -2.8104897731 |
| H    | 1.0    | -1.1297330499 | -0.7078466684  | -2.5741744163 |
| H    | 1.0    | -2.0172725238 | 0.8055758530   | -2.9731907907 |
| H    | 1.0    | -2.4452614748 | -0.7342201846  | -3.7768725053 |
| C    | 6.0    | -3.2907310251 | -2.1878717125  | -1.7221330324 |
| H    | 1.0    | -4.0704100629 | -2.5703161412  | -1.0360059867 |
| H    | 1.0    | -2.3280885630 | -2.6862198939  | -2.4777209293 |
| H    | 1.0    | -3.5731478227 | -2.5102100830  | -2.7476034380 |
| C    | 6.0    | -2.7071018437 | 1.8884584864   | 0.1610465046  |
| C    | 6.0    | -4.1519998297 | 2.2794742375   | 0.5420333278  |
| H    | 1.0    | -4.4463597524 | 1.9092922938   | 1.5430525437  |
| H    | 1.0    | -4.8997689102 | 1.9276087495   | -0.1941045679 |
| H    | 1.0    | -4.2214030103 | 3.3891521880   | 0.5774490647  |
| C    | 6.0    | -2.3317630325 | 2.5953723538   | -1.1621325232 |
| H    | 1.0    | -1.3116515998 | 2.3301928500   | -1.5071146543 |
| H    | 1.0    | -2.3415822418 | 3.6928651915   | -0.9868347600 |
| H    | 1.0    | -3.0481793809 | 2.3937931200   | -1.9808920912 |
| C    | 6.0    | -1.7267350297 | 2.4108715730   | 1.2393441791  |
| H    | 1.0    | -1.9594337823 | 2.0517333294   | 2.2577035181  |
| H    | 1.0    | -1.7811525054 | 3.5210359824   | 1.0641558784  |
| H    | 1.0    | -0.6794503179 | 2.1357810817   | 1.0027137371  |
| C    | 6.0    | 3.5662811551  | -1.4838051381  | -0.7545479732 |
| C    | 6.0    | 2.8964563281  | 1.6233606853   | -0.8953221197 |
| C    | 6.0    | 3.4522644638  | -2.7491278116  | 0.1317309080  |
| H    | 1.0    | 3.9148313957  | -2.6298214925  | 1.1299780008  |
| H    | 1.0    | 3.9904331238  | -3.5771939781  | -0.3781826315 |
| H    | 1.0    | 2.4010061479  | -3.0862832634  | 0.2632136549  |
| C    | 6.0    | 2.9902979352  | -1.8697577942  | -2.1413089889 |
| H    | 1.0    | 3.1011101703  | -1.0808128314  | -2.9056631323 |
| H    | 1.0    | 1.9116260789  | -2.1425859388  | -2.0727590705 |
| H    | 1.0    | 3.5217290696  | -2.7713110565  | -2.5161621932 |
| C    | 6.0    | 5.0560808669  | -1.1079438475  | -0.9021955133 |
| H    | 1.0    | 5.2202109796  | -0.2985563555  | -1.6397969612 |
| H    | 1.0    | 5.6119119741  | -1.9968105957  | -1.2738498296 |
| H    | 1.0    | 5.5231792901  | -0.8073767858  | -0.0554531365 |
| C    | 6.0    | 2.9921993758  | 1.4173383617   | 2.4254631160  |
| H    | 1.0    | 3.0933453708  | 2.4149479734   | -2.9049791552 |
| H    | 1.0    | 2.0817800095  | 0.9423494059   | -2.8467641164 |
| H    | 1.0    | 3.8748818887  | 0.8243783829   | -2.7314243557 |
| C    | 6.0    | 4.2113367278  | 2.2562475123   | -0.3883603860 |
| H    | 1.0    | 4.3844314622  | 3.2017743509   | -0.9475468796 |
| H    | 1.0    | 5.0927605186  | 1.6088606336   | -0.5568682907 |
| H    | 1.0    | 4.1744218463  | 2.5204383238   | 0.6863552194  |
| C    | 6.0    | 1.7222772634  | 2.6020824985   | -0.6599781486 |
| H    | 1.0    | 1.9184664584  | 3.5420088685   | -1.2203130904 |
| H    | 1.0    | 1.5814204100  | 2.8769080894   | 0.4003887447  |
| H    | 1.0    | 0.7673060471  | 2.1843648215   | -1.0398739746 |
| C    | 6.0    | -3.2794124461 | -0.9577688439  | 1.4587798100  |
| C    | 6.0    | -2.6539607681 | -2.3710088966  | 1.5696722307  |
| H    | 1.0    | -3.1196274331 | -2.9027867713  | 2.4284691903  |
| H    | 1.0    | -1.5621561101 | -2.3249465191  | 1.7804831424  |
| H    | 1.0    | -2.8026144709 | -3.0038680892  | 0.6758025557  |
| C    | 6.0    | -2.9556598943 | -0.2387447084  | 2.7894549487  |
| H    | 1.0    | -3.3130630084 | -0.8798721662  | 3.6240885893  |
| H    | 1.0    | -3.4650767676 | 0.7380394118   | 2.8958922234  |
| H    | 1.0    | -1.8658349471 | -0.0891897008  | 2.9381461489  |
| C    | 6.0    | -4.8122436764 | -1.0864260510  | 1.3172382819  |
| H    | 1.0    | -5.2147226043 | -1.5839534173  | 2.2272018464  |
| H    | 1.0    | -5.1070570567 | -1.7134494016  | 0.4536660316  |
| H    | 1.0    | -5.3225495727 | -0.1084549994  | 1.2262324696  |
| C    | 6.0    | 2.6915106425  | 0.0656283911   | 1.8894905195  |
| C    | 6.0    | 2.1327461923  | 1.405558053    | 2.4207204093  |
| H    | 1.0    | 2.7348730354  | 2.2824479134   | 2.1153089108  |
| H    | 1.0    | 2.1505096195  | 1.3733909093   | 3.5317772901  |
| H    | 1.0    | 1.0794320200  | 1.5738547675   | 2.1171405227  |

Reactant 0In:

| ATOM | CHARGE | X              | Y             | Z              |
|------|--------|----------------|---------------|----------------|
| P    | 15.0   | 2.6285135588   | 0.0995332154  | 0.0018768651   |
| IN   | 49.0   | -0.0019764293  | -1.4779368720 | -0.1424885944  |
| P    | 15.0   | -2.6268841457  | 0.1402092124  | 0.0304455712   |
| C    | 6.0    | 3.1144608115   | -0.2412764335 | 1.8607900671   |
| C    | 6.0    | 4.3695811638   | 0.5056237887  | 2.3620480267   |
| H    | 1.0    | 5.2739701501   | 0.2534417461  | 1.7758224329   |
| H    | 1.0    | 4.5693105971   | 0.2140998673  | 3.4168553611   |
| H    | 1.0    | 4.2452493951   | 1.6059455456  | 2.3515773577   |
| C    | 6.0    | 1.8936845106   | 0.1573613372  | 2.7292161860   |
| H    | 1.0    | 0.9687776928   | -0.3840838144 | 2.4239930918   |
| H    | 1.0    | 1.6717880618   | 1.2395916050  | 2.7122947964   |
| H    | 1.0    | 2.0915052538   | -0.1248248869 | 3.7864033953   |
| C    | 6.0    | 3.3201097525   | -1.7607874087 | 2.0706435505   |
| H    | 1.0    | 4.2251789407   | -2.1529139290 | 1.5687387514   |
| H    | 1.0    | 2.4465841989   | -2.3599016114 | 1.7336785307   |
| H    | 1.0    | 3.4424910979   | -1.9529013994 | 3.1586925482   |
| C    | 6.0    | 2.7949191583   | 2.0035146192  | -0.3854991803  |
| C    | 6.0    | 4.2432525818   | 2.4995905404  | -0.5885970751  |
| H    | 1.0    | 4.7334221709   | 2.0441528430  | -1.4705149744  |
| H    | 1.0    | 4.8834220503   | 2.3191862645  | 0.2966629714   |
| H    | 1.0    | 4.2255035265   | 3.5982846410  | -0.7621913411  |
| C    | 6.0    | 2.1459560353   | 2.8226324688  | 0.7532489350   |
| H    | 1.0    | 1.1016403610   | 2.5097477558  | 0.9566694700   |
| H    | 1.0    | 2.1123369604   | 3.8888558258  | 0.4402754820   |
| H    | 1.0    | 2.7214086923   | 2.7841003379  | 1.6980421710   |
| C    | 6.0    | 1.9583789951   | 2.2848989798  | -1.6590988678  |
| H    | 1.0    | 2.3464086310   | 1.7891359356  | -2.5665150085  |
| H    | 1.0    | 1.9628141569   | 3.3790727358  | -1.8569163041  |
| H    | 1.0    | 0.9006518092   | 1.9776070780  | -1.5225375051  |
| C    | 6.0    | -3.8473860169  | -1.3829219443 | 0.1470588236   |
| C    | 6.0    | -3.0196268824  | 1.3880913885  | 1.4758819888   |
| C    | 6.0    | -3.7609938858  | -2.2139443503 | -1.1558479798  |
| H    | 1.0    | -4.1863353225  | -1.6984216570 | -2.0379328212  |
| H    | 1.0    | -4.3450331157  | -3.1491872340 | -0.10159844551 |
| H    | 1.0    | -2.7195820320  | -2.5204359046 | -1.3941211083  |
| C    | 6.0    | -3.3302758302  | -2.3069667794 | 1.2801472442   |
| H    | 1.0    | -3.4090657681  | -1.8652258051 | 2.2892066225   |
| H    | 1.0    | -2.2710891918  | -2.6057275237 | 1.1157954820   |
| H    | 1.0    | -3.9298682237  | -3.2430889439 | 1.2821993809   |
| C    | 6.0    | -5.3242133720  | -1.0231890267 | 0.4187892300   |
| H    | 1.0    | -5.4672223829  | -0.5400258788 | 1.4049467346   |
| H    | 1.0    | -5.9266564151  | -1.9583444705 | 0.4264799396   |
| H    | 1.0    | -5.7560108115  | -0.3624108182 | -0.3569890740  |
| C    | 6.0    | -3.1760065237  | 0.6134364444  | 2.8063882121   |
| H    | 1.0    | -3.2146116369  | 1.3522605380  | 3.6356625022   |
| H    | 1.0    | -2.2981494064  | -0.0475880171 | 3.0115374844   |
| H    | 1.0    | -4.0929668676  | 0.0111980041  | 2.8584941120   |
| C    | 6.0    | -4.2824306322  | 2.2514760670  | 1.2587585723   |
| H    | 1.0    | -4.4267418246  | 2.9077263477  | 2.1453072167   |
| H    | 1.0    | -5.2011922062  | 1.6443355068  | 1.1469162408   |
| H    | 1.0    | -4.1975530155  | 2.9177969530  | 0.3787240953   |
| C    | 6.0    | -1.7809484018  | 2.3036141281  | 1.6378002520   |
| H    | 1.0    | -1.9361584059  | 2.9656926869  | 2.5174521728   |
| H    | 1.0    | -1.5995663975  | 2.9583880625  | 0.7662736091   |
| H    | 1.0    | -0.86299012361 | 1.7090993452  | 1.8272172179   |
| C    | 6.0    | 3.8252343542   | -0.8977003678 | -1.1792017785  |
| C    | 6.0    | 3.3519836498   | -2.3735365152 | -1.2113555969  |
| H    | 1.0    | 4.0091811932   | -2.9423648010 | -1.9049097302  |
| H    | 1.0    | 2.3179584908   | -2.4637163614 | -1.6094086464  |
| H    | 1.0    | 3.3954020312   | -2.8840146329 | -0.2321077170  |
| C    | 6.0    | 3.6832908621   | -0.3725984523 | -2.6275421996  |
| H    | 1.0    | 4.2467035782   | -1.0543226668 | -3.3009876830  |
| H    | 1.0    | 4.1058402287   | 0.6399440429  | -2.7686924734  |
| H    | 1.0    | 2.6298104405   | -0.3709432898 | -2.9784689951  |
| C    | 6.0    | 5.3154233466   | -0.8449729791 | -0.7726590757  |
| H    | 1.0    | 5.9141978666   | -1.4090038567 | -1.5215323534  |
| H    | 1.0    | 5.5070550648   | -1.3173363418 | 0.2103061052   |
| H    | 1.0    | 5.7129987605   | 0.1875026443  | -0.7452776501  |
| C    | 6.0    | -2.8741707192  | 1.0250543419  | -1.6892828157  |
| C    | 6.0    | -2.2515226339  | 2.4393221047  | -1.6595154099  |
| H    | 1.0    | -2.8148550561  | 3.1509175086  | -1.0261366679  |
| H    | 1.0    | -2.2648058432  | 2.8464693984  | -2.6939047153  |
| H    | 1.0    | -1.1932838145  | 2.4319204738  | -1.3264443009  |
| C    | 6.0    | -4.3426159204  | 1.1487550094  | -2.1532545261  |
| H    | 1.0    | -4.3728939605  | 1.6981977366  | -3.1200790713  |
| H    | 1.0    | -4.9649655426  | 1.7169654869  | -1.4348058559  |
| H    | 1.0    | -4.8260324772  | 0.1683026170  | -2.3283101163  |
| C    | 6.0    | -2.0602789558  | 0.2110424447  | -2.7287772422  |
| H    | 1.0    | -2.3809269383  | -0.8430393699 | -2.8175599821  |
| H    | 1.0    | -0.9706990824  | 0.2285878507  | -2.4987571353  |
| H    | 1.0    | -2.1773550466  | 0.6761441345  | -3.7320997253  |

Reactant 0Tl:

| ATOM | CHARGE | X             | Y             | Z             |
|------|--------|---------------|---------------|---------------|
| P    | 15.0   | 2.6482156335  | 0.2891097204  | 0.0440507865  |
| TL   | 81.0   | -0.0138775107 | -1.3611086317 | -0.0332003923 |
| P    | 15.0   | -2.6637695057 | 0.3063169582  | 0.0147962625  |
| C    | 6.0    | 3.4941091689  | -0.6108596597 | 1.5587178420  |
| C    | 6.0    | 4.8488928655  | -0.0191443759 | 2.0045609980  |

|   |     |              |               |              |
|---|-----|--------------|---------------|--------------|
| C | 6.0 | 4.1599241765 | -0.0667564990 | 2.3520310533 |
| H | 1.0 | 4.1970926312 | 0.0438594572  | 3.4580708631 |
| H | 1.0 | 4.8091319561 | 0.7211093074  | 1.9227261795 |
| H | 1.0 | 4.6058720753 | -1.0512272375 | 2.1133357850 |
| C | 6.0 | 1.8271581843 | -1.0492306282 | 2.5320025010 |
| H | 1.0 | 2.0883458264 | -2.0695159227 | 2.1979479826 |
| H | 1.0 | 0.7423963743 | -0.8821362685 | 2.3376632571 |
| H | 1.0 | 1.9541415689 | -1.0204109590 | 3.6364666955 |

Reactant 0Ga:

| ATOM | CHARGE | X             | Y             | Z             |
|------|--------|---------------|---------------|---------------|
| P    | 15.0   | 2.4466987548  | 0.0616614295  | 0.0219105739  |
| GA   | 31.0   | -0.0041883155 | -1.3333194328 | 0.2348868065  |
| P    | 15.0   | -2.4612949493 | 0.0379249369  | 0.0000602476  |
| C    | 6.0    | 3.2275284901  | -0.7207579082 | 1.6331816424  |
| C    | 6.0    | 4.6026749606  | -0.1475501361 | 2.0367663278  |
| H    | 1.0    | 5.3680336200  | -0.2968722796 | 1.2504764355  |
| H    | 1.0    | 4.9609149156  | -0.6757398288 | 2.9479482983  |
| H    | 1.0    | 4.5683523877  | 0.9304487701  | 2.2868247406  |
| C    | 6.0    | 2.2035402303  | -0.4920715521 | 2.7745857166  |
| H    | 1.0    | 1.2117347617  | -0.9411617395 | 2.5278311759  |
| H    | 1.0    | 2.0437058164  | 0.5714408519  | 3.0265442229  |
| H    | 1.0    | 2.5571591898  | -1.0056001778 | 3.6949883451  |
| C    | 6.0    | 3.3659079550  | -2.2540164585 | 1.4698947456  |
| H    | 1.0    | 4.1366452539  | -2.5448856864 | 0.7310807587  |
| H    | 1.0    | 2.4087941848  | -2.7463481712 | 1.1945526491  |
| H    | 1.0    | 3.6770253928  | -2.6802616295 | 2.4481869926  |
| C    | 6.0    | 2.7311623905  | 1.9925931706  | 0.0375639438  |
| C    | 6.0    | 4.1673135960  | 2.4362612364  | -0.3169466117 |
| H    | 1.0    | 4.4506178413  | 2.1670869228  | -1.3528797573 |
| H    | 1.0    | 4.9282388470  | 2.0227860294  | 0.3721701654  |
| H    | 1.0    | 4.2242748285  | 3.5447806702  | -0.2454132626 |
| C    | 6.0    | 2.3564929042  | 2.5488039224  | 1.4312073451  |
| H    | 1.0    | 1.3283129091  | 2.2612612138  | 1.7335789813  |
| H    | 1.0    | 2.3830738770  | 3.6590484171  | 1.3835019197  |
| H    | 1.0    | 3.0600718099  | 2.2445593784  | 2.2292763056  |
| C    | 6.0    | 1.7334040180  | 2.6202784285  | -0.9672039289 |
| H    | 1.0    | 1.9476556603  | 2.3668304649  | -2.0205966413 |
| H    | 1.0    | 1.7889506528  | 3.7271753591  | -0.8787442252 |
| H    | 1.0    | 0.6897101738  | 2.3219051050  | -0.7412997032 |
| C    | 6.0    | -3.5773958230 | -1.4614656732 | 0.5717911836  |
| C    | 6.0    | -2.9725301864 | -1.6419525407 | 0.9892702485  |
| C    | 6.0    | -3.4255011852 | -2.6404262334 | -0.4189527753 |
| H    | 1.0    | -3.8764270805 | -2.4450239211 | -1.4107615733 |
| H    | 1.0    | -3.9515081236 | -3.5219152017 | 0.0075784058  |
| H    | 1.0    | -2.3655922547 | -2.9412218512 | -0.5636357693 |
| C    | 6.0    | -3.0164228486 | -1.9626743542 | 1.9288746776  |
| H    | 1.0    | -3.0589213631 | -1.2097848498 | 2.7352476080  |
| H    | 1.0    | -1.9657331743 | -2.3197691159 | 1.8386094529  |
| H    | 1.0    | -3.6165480169 | -2.8369129306 | 2.2634562805  |
| C    | 6.0    | -5.0760984423 | -1.1250180486 | 0.7256457733  |
| H    | 1.0    | -5.2650140680 | -0.3632314868 | 1.5066436103  |
| H    | 1.0    | -5.6182656295 | -2.0449780639 | 1.0376824815  |
| H    | 1.0    | -5.5383223009 | -0.7771108206 | -0.2181549999 |
| C    | 6.0    | -3.0910015828 | 1.3052468856  | 2.4946153001  |
| H    | 1.0    | -3.2248754979 | 2.2564326325  | 3.0531670734  |
| H    | 1.0    | -2.1735940365 | 0.8212266601  | 2.8899447837  |
| C    | 6.0    | -3.9615359945 | 0.6649563120  | 2.7331775494  |
| H    | 1.0    | -4.2879691787 | 2.2982205456  | 0.5141583870  |
| H    | 1.0    | -4.4949751730 | 3.1807619729  | 1.1588874367  |
| H    | 1.0    | -5.1598398240 | 1.6214937741  | 0.5943410955  |
| H    | 1.0    | -4.2302746061 | 2.6709162801  | -0.5270263060 |
| C    | 6.0    | -1.8096009403 | 2.6555143334  | 0.8614816707  |
| H    | 1.0    | -2.0261974480 | 3.5313342552  | 1.5108045673  |
| H    | 1.0    | -1.6667086590 | 3.0383637329  | -0.1647020909 |
| H    | 1.0    | -0.8506149004 | 2.2160161262  | 1.2058197172  |
| C    | 6.0    | 3.2935864312  | -0.7109758229 | -1.5553684396 |
| H    | 1.0    | 2.6915324234  | -2.1210460494 | -1.7898668226 |
| H    | 1.0    | 3.1477285805  | -2.5474401332 | -2.7098946213 |
| H    | 1.0    | 1.5941159627  | -2.0836258843 | -1.9701487907 |
| H    | 1.0    | 2.8796591567  | -2.8382790885 | -0.9709077591 |
| C    | 6.0    | 2.9157602518  | 0.1288255192  | -2.7980015495 |
| H    | 1.0    | 3.2551854076  | -0.4153494738 | -3.7058155998 |
| H    | 1.0    | 3.4022677416  | 1.1227913285  | -2.8183755596 |
| H    | 1.0    | 1.8188332191  | 0.2705230158  | -2.8945791839 |
| C    | 6.0    | 4.8329347643  | -0.8181834282 | -1.4726758387 |
| H    | 1.0    | 5.2146313865  | -1.2293102175 | -2.4333941933 |
| H    | 1.0    | 5.1741627978  | -1.5058382939 | -0.6745392556 |
| H    | 1.0    | 5.3229115133  | 0.1618954451  | -1.3176045389 |
| C    | 6.0    | -2.7010603467 | 0.3312256248  | -1.9114020175 |
| C    | 6.0    | -2.1441660698 | 1.7182329279  | -2.3068850613 |
| H    | 1.0    | -2.7646081960 | 2.5582173382  | -1.9401674647 |
| H    | 1.0    | -2.1315308243 | 1.7848090775  | -3.4163548315 |
| H    | 1.0    | -1.1017969600 | 1.8660596028  | -1.9582413812 |
| C    | 6.0    | -4.1599666149 | 0.2255588528  | -2.4071666233 |
| H    | 1.0    | -4.1856300798 | 0.4571446150  | -3.4947920657 |
| H    | 1.0    | -4.8300769482 | 0.9488774390  | -1.9032165790 |
| H    | 1.0    | -4.5866015112 | -0.7883743417 | -2.2840549126 |
| C    | 6.0    | -1.8168897463 | -0.7133884903 | -2.6413816818 |
| H    | 1.0    | -2.0791401553 | -1.7624262481 |               |

|   |     |               |               |               |   |     |               |               |                |
|---|-----|---------------|---------------|---------------|---|-----|---------------|---------------|----------------|
| H | 1.0 | 5.6106219888  | -0.0481666990 | 1.2018811605  | H | 1.0 | -1.8773410035 | 2.7636327582  | 1.8223134092   |
| H | 1.0 | 5.2454393119  | -0.6177083277 | 2.8546121911  | H | 1.0 | -1.1938882730 | 3.7197660676  | 0.4890815576   |
| C | 1.0 | 4.7620626869  | 1.0246339969  | 2.3631705233  | C | 6.0 | -1.8578288326 | 2.3590866590  | -1.6370353019  |
| H | 6.0 | 2.4917499773  | -0.5482882737 | 2.7406703253  | H | 1.0 | -2.6214345736 | 2.0433007760  | -2.3730963320  |
| H | 1.0 | 1.5032672865  | -0.9883991190 | 2.4773072517  | H | 1.0 | -0.8813248737 | 1.9715741242  | -1.9819510227  |
| H | 1.0 | 2.3133524246  | 0.4755562890  | 3.1143531430  | H | 1.0 | -1.8218918186 | 3.4689896798  | -1.6698635974  |
| H | 1.0 | 2.8916679716  | -1.1457281691 | 3.5887583998  | C | 6.0 | -2.8155084534 | -0.5815203394 | 1.6777618626   |
| C | 6.0 | 3.6925637831  | -2.1095858002 | 1.2317459935  | C | 6.0 | -4.3560029878 | -0.6149430095 | 1.5699910946   |
| H | 1.0 | 4.4628183515  | -2.2912078709 | 0.4579580297  | H | 1.0 | -4.7228617869 | -1.3981431452 | 0.8793637696   |
| H | 1.0 | 2.7491855421  | -2.6024661818 | 0.9132493161  | H | 1.0 | -4.8026214585 | 0.3505294206  | 1.2723313448   |
| H | 1.0 | 4.0311779099  | -2.6297469909 | 2.1540752941  | H | 1.0 | -4.7647249097 | -0.8621169465 | 2.5745953052   |
| C | 6.0 | 2.8168461239  | 2.2204708145  | 0.2812058106  | C | 6.0 | -2.3981152985 | 0.3888208860  | 2.8027125750   |
| C | 6.0 | 4.2138438588  | 2.7957616745  | -0.0441028036 | H | 1.0 | -1.2991959835 | 0.5371824121  | 2.876558137    |
| H | 1.0 | 4.4897882757  | 2.6764649681  | -1.1096099980 | H | 1.0 | -2.7031003082 | -0.0514713358 | 3.7765553155   |
| H | 1.0 | 5.0148302799  | 2.3492439514  | 0.5757866700  | H | 1.0 | -2.8928934656 | 1.3747686992  | 2.7299205258   |
| H | 1.0 | 4.2079916728  | 3.8884747736  | 0.1642196856  | C | 6.0 | -2.3327336821 | -1.9793051744 | 2.1084376615   |
| C | 6.0 | 2.4477929068  | 2.6082622994  | 1.7320916221  | H | 1.0 | -2.6331563288 | -2.7824345529 | 1.4102615134   |
| H | 1.0 | 1.4602798385  | 2.2058870783  | 2.0384807464  | H | 1.0 | -2.7972563283 | -2.2199374123 | 3.0893362049   |
| H | 1.0 | 2.3775674996  | 3.7162640900  | 1.7872319196  | H | 1.0 | -1.2360467594 | -2.0092617337 | 2.2536374767   |
| H | 1.0 | 3.2066971990  | 2.2983661090  | 2.4760712561  | C | 6.0 | 2.4140182759  | 1.6795622184  | -0.9226887564  |
| C | 6.0 | 1.7533714240  | 2.8824638186  | -0.6288711345 | C | 6.0 | 2.5434391502  | 0.0955211260  | 1.8875958122   |
| H | 1.0 | 1.9134721221  | 2.6962075297  | -1.7060012443 | C | 6.0 | 2.2502496371  | 1.4728147275  | -2.4465881386  |
| H | 1.0 | 1.7846709568  | 3.9836243545  | -0.4771798998 | H | 1.0 | 3.0074712606  | 0.7999054212  | -2.8883955642  |
| H | 1.0 | 0.7323811660  | 2.5392676788  | -0.3637098921 | H | 1.0 | 2.3682475843  | 2.4585893437  | -2.9458512088  |
| C | 6.0 | -3.9203866619 | -1.1847255727 | 0.1546276864  | H | 1.0 | 1.2437785244  | 1.0803553740  | -2.6960293986  |
| C | 6.0 | -3.0489281707 | 1.6015878062  | 1.4195677569  | C | 6.0 | 1.5132336541  | 2.8690054839  | -0.5455844370  |
| C | 6.0 | -3.8190739635 | -2.0559470448 | -1.1207852511 | H | 1.0 | 1.5200690601  | 3.1077921106  | 0.5322536298   |
| H | 1.0 | -4.2056248489 | -1.5563982947 | -2.0295707337 | H | 1.0 | 0.4753996804  | 2.7262666817  | 0.8789244995   |
| H | 1.0 | -4.4306201433 | -2.9724590810 | -0.9731995897 | H | 1.0 | 1.9020746362  | 3.7632586360  | -1.0791255318  |
| H | 1.0 | -2.7796247781 | -2.3947268759 | -1.3204924916 | C | 6.0 | 3.8580841941  | 2.1188639634  | -0.5807617371  |
| C | 6.0 | -3.4546811338 | -2.0843609430 | 1.3296306553  | H | 1.0 | 3.9384607976  | 2.5072595901  | 0.4531808064   |
| H | 1.0 | -3.5901954623 | -1.6231530565 | 2.3237073109  | H | 1.0 | 4.1081752067  | 2.9654607755  | -1.2565379232  |
| H | 1.0 | -2.3870904866 | -2.3814009857 | 1.2324789949  | H | 1.0 | 4.6313894180  | 1.3487916343  | 0.7289628961   |
| H | 1.0 | -4.0498125556 | -3.0233626220 | 1.3190516910  | C | 6.0 | 2.0155950434  | 1.4065514682  | -2.5061568962  |
| C | 6.0 | -5.3960134959 | -0.7889648145 | 0.3806333980  | H | 1.0 | 2.1927519107  | 1.3797557853  | 3.6031661714   |
| H | 1.0 | -5.5489894072 | -0.2730616888 | 1.3487662838  | H | 1.0 | 0.9216920831  | 1.5207512477  | 2.3590940244   |
| H | 1.0 | -6.0171824943 | -1.7113950865 | 0.4034486277  | H | 1.0 | 2.5281907534  | 2.3093332094  | 2.1209312740   |
| H | 1.0 | -5.7975897149 | -0.1430827001 | -0.4232359390 | C | 6.0 | 4.0735496879  | 0.0330630563  | 2.0815200166   |
| C | 6.0 | -3.2210718035 | 0.8633496952  | 2.7675104703  | H | 1.0 | 4.2878866650  | 0.1336359899  | 3.1681257414   |
| H | 1.0 | -3.2530399232 | 1.6214785196  | 3.5799639545  | H | 1.0 | 4.6123892849  | 0.8516986986  | 1.5708729134   |
| H | 1.0 | -2.3720351314 | 0.1839302409  | 2.9903219658  | H | 1.0 | 4.5162749440  | -0.9300515326 | 1.7633344289   |
| H | 1.0 | -4.1645798759 | 0.2880569413  | 2.8304725619  | C | 6.0 | 1.8800465522  | -1.0658103540 | 2.6582368324   |
| C | 6.0 | -4.2936108314 | 2.4822036732  | 1.1698474779  | H | 1.0 | 2.0760869783  | -0.9337309993 | 3.7441622112   |
| H | 1.0 | -4.4353445320 | 3.1603874748  | 2.0401572647  | H | 1.0 | 2.2753159391  | -2.0591297285 | 2.3752388033   |
| H | 1.0 | -5.2220416634 | 1.8891752470  | 1.0615191563  | H | 1.0 | 0.7787580361  | -1.0599398816 | 2.5144525889   |
| H | 1.0 | -4.1887471485 | 3.1280704394  | 0.2764850237  | C | 6.0 | -2.8549107260 | -0.9213499356 | -1.45479436504 |
| C | 6.0 | -1.7963777855 | 2.5003615168  | 1.5700633987  | H | 6.0 | -1.9410706679 | -0.8546637829 | -2.7887187450  |
| H | 1.0 | -1.9410027945 | 3.1726257971  | 2.4436151460  | C | 1.0 | -2.4479493885 | -1.3849457809 | -3.6240527411  |
| H | 1.0 | -1.6087288051 | 3.1441264476  | 0.6918174972  | H | 1.0 | -0.9601472297 | -1.3371094252 | -2.6126138117  |
| H | 1.0 | -0.8833630738 | 1.8979965331  | 1.7605559403  | H | 1.0 | -1.7407506762 | 0.1794469731  | -3.1242468173  |
| C | 6.0 | 3.5566738082  | -0.2321640457 | -1.6057744023 | C | 6.0 | -3.1494491534 | -2.4143732510 | -1.2684255010  |
| C | 6.0 | 3.0320808034  | -1.6333503383 | -2.0116667255 | H | 1.0 | 3.7040279379  | -2.8165504018 | -2.1435059652  |
| H | 1.0 | 3.5261746259  | -1.9471872974 | -2.9572942655 | H | 1.0 | -3.7905417677 | -2.5883678298 | -0.3834300923  |
| H | 1.0 | 1.9388068044  | -1.6270236334 | -2.2195161503 | H | 1.0 | -2.2348537040 | -3.0249119950 | -1.1780210467  |
| H | 1.0 | 3.2309488387  | -2.4202289691 | -1.2618910350 | C | 6.0 | -4.2077814729 | -0.2523805860 | -1.8873662714  |
| C | 6.0 | 3.1488023915  | 0.7271809493  | -2.7486311092 | H | 1.0 | -4.6787276230 | -0.8421098047 | -2.7033785438  |
| H | 1.0 | 3.5420361296  | 0.3196237271  | -3.7053537220 | H | 1.0 | -4.1000122545 | 0.7787085116  | -2.2718512224  |
| H | 1.0 | 3.5696135548  | 1.7444427434  | -2.6359617955 | H | 1.0 | -4.9222626120 | -0.2465798936 | -1.0431133158  |
| H | 1.0 | 2.0469876013  | 0.8106000555  | -2.8585814515 | C | 6.0 | 2.9543957002  | -1.4589593352 | -0.9026676491  |
| C | 6.0 | 5.0982371042  | -0.2738505749 | -1.5151327720 | C | 6.0 | 3.1816957424  | -2.6886055752 | 0.125844802    |
| H | 1.0 | 5.5124048682  | -0.5372172440 | -2.5134608139 | H | 1.0 | 3.8901352386  | -2.4740441943 | 0.8342828331   |
| H | 1.0 | 5.4642231735  | -1.0410160066 | -0.8051613445 | H | 1.0 | 3.6522302023  | -3.4817949660 | -0.6078874395  |
| H | 1.0 | 5.5347112680  | 0.7017200804  | -1.2277078731 | H | 1.0 | 2.2701331357  | -3.1236158883 | 0.4466254008   |
| C | 6.0 | -2.8687710071 | 1.1507885425  | -1.7312604381 | C | 6.0 | 4.3782839428  | -0.9917828700 | -1.2944228260  |
| C | 6.0 | -2.2191305968 | 2.5530344845  | -1.7308462249 | H | 1.0 | 4.9011317984  | -1.8748556667 | -1.7207216727  |
| H | 1.0 | -2.7734455861 | 3.2916125239  | -1.1208411575 | H | 1.0 | 4.9811646885  | -0.6560458351 | -0.4296784341  |
| H | 1.0 | -2.2166427528 | 2.9350944848  | -2.7750398583 | H | 1.0 | 4.4009933718  | -0.2092317547 | -2.0738772131  |
| H | 1.0 | -1.1641252460 | 2.5316335542  | -1.3897283929 | C | 6.0 | 2.2297460217  | -1.8941070213 | -2.1956751640  |
| C | 6.0 | -4.3269659765 | 1.2892124646  | -2.2216496524 | H | 1.0 | 2.1570687654  | -1.0807134191 | -2.9392549396  |
| H | 1.0 | -4.3311157179 | 1.8117473705  | -3.2036991647 | H | 1.0 | 1.2062736329  | -2.2670698708 | -2.0229633204  |
| H | 1.0 | -4.9478273288 | 1.8903942002  | -1.5289996632 | H | 1.0 | 2.8169066310  | -2.7166808865 | -2.6586621560  |
| H | 1.0 | -4.8274001174 | 0.3138976379  | -2.3765729731 | C | 6.0 | -0.0652827982 | -2.9804380736 | 0.1165109548   |
| C | 6.0 | -2.0509741408 | 0.2947278584  | -2.7331195832 | H | 1.0 | 0.4756479791  | -2.9190006577 | 1.0718209681   |
| H | 1.0 | -2.3803352441 | -0.7589469156 | -2.7889898211 | H | 1.0 | -1.0961624641 | -3.3165325295 | 0.2862150643   |
| H | 1.0 | -0.9649714058 | 0.3112319932  | -2.4877902697 | H | 1.0 | 0.4500977123  | -3.6459704361 | -0.5996995730  |
| H | 1.0 | -2.1513909024 | 0.7258678786  | -3.7531473327 | H | 1.0 | -0.1011583275 | -1.9580131960 | -0.4373970770  |

### Transition state TS1A:

| ATOM | CHARGE | X             | Y             | Z             |
|------|--------|---------------|---------------|---------------|
| P    | 15.0   | -0.0001368007 | -0.0103155236 | 0.0108881333  |
| AL   | 13.0   | -0.0197619161 | 0.0487582250  | 2.5859032146  |
| P    | 15.0   | 1.8233338921  | 0.0019426406  | 4.3961352218  |
| C    | 6.0    | 0.4341848486  | -1.8694047154 | -0.4063984536 |
| C    | 6.0    | 0.6167834659  | -2.1658678789 | -1.9123308162 |
| H    | 1.0    | -0.2795081368 | -1.9412296347 | -2.5180561226 |
| H    | 1.0    | 0.8253508139  | -3.2518451482 | -2.0268748987 |
| H    | 1.0    | 1.4809714857  | -1.6290130151 | -2.3494009059 |
| C    | 6.0    | 1.7501502855  | -2.2234977517 | 0.3193063186  |
| H    | 1.0    | 1.6977637660  | -1.9950484680 | 1.4014525210  |
| H    | 1.0    | 2.6360381330  | -1.7213706420 | -0.1071537172 |
| H    | 1.0    | 1.9216030389  | -3.3187865893 | 0.2356123318  |
| C    | 6.0    | -0.6672997460 | -2.7915926216 | 0.1680985644  |
| H    | 1.0    | -1.6258437642 | -2.7146537158 | -0.3794652758 |

### Transition states of the reactions with methane

#### Transition state TS1B:

| ATOM | CHARGE | X             | Y             | Z             |
|------|--------|---------------|---------------|---------------|
| P    | 15.0   | -1.9055942070 | -0.0169347418 | -0.0200431551 |
| B    | 5.0    | -0.0026280998 | -0.2873351694 | -0.1785038234 |
| P    | 15.0   | 1.8925026686  | -0.0051285137 | 0.0070546506  |
| C    | 6.0    | -2.2239852411 | 1.9217594908  | -0.1951568972 |
| C    | 6.0    | -3.6865067200 | 2.3584994509  | 0.0656170139  |
| H    | 1.0    | -4.4278238652 | 1.9072245444  | -0.6151776398 |
| H    | 1.0    | -3.7232565791 | 3.4583651633  | -0.0951121054 |
| H    | 1.0    | -4.0045868199 | 2.1843777531  | 1.1102288264  |
| C    | 6.0    | -1.3630106041 | 2.6828964325  | 0.8488758197  |
| H    | 1.0    | -0.3798078960 | 2.2216198934  | 0.3338929322  |



|   |     |               |               |               |   |     |               |               |                |
|---|-----|---------------|---------------|---------------|---|-----|---------------|---------------|----------------|
| H | 1.0 | -0.8618691559 | -2.5971850018 | 1.2448706076  | H | 1.0 | -4.9438753602 | -1.0040579932 | 1.6308928567   |
| H | 1.0 | -0.3227927207 | -3.8439565755 | 0.0738419273  | H | 1.0 | -4.8926701444 | 0.7857613175  | 1.7713049519   |
| C | 6.0 | 1.1706931744  | 1.1672303469  | -1.0385623156 | H | 1.0 | -4.6068492223 | -0.2400364687 | 3.2032428981   |
| C | 6.0 | 0.7942709319  | 1.2548393902  | -2.5353117967 | C | 6.0 | -2.2509238415 | 0.9361177986  | 2.7345608772   |
| H | 1.0 | -0.1998063116 | 1.7104430755  | -2.7021505203 | H | 1.0 | -1.1571243861 | 1.0222706557  | 2.5745901576   |
| H | 1.0 | 0.8247284075  | 0.2770200850  | -3.0521026280 | H | 1.0 | -2.4036875797 | 0.6832211777  | 3.8060545803   |
| H | 1.0 | 1.5357377731  | 1.9128195259  | -3.0395456930 | H | 1.0 | -2.7148931840 | 1.9274764247  | 2.5710162991   |
| C | 6.0 | 2.6338471900  | 0.6838447811  | -0.9285969171 | C | 6.0 | -2.3190958904 | -1.5258117007 | 2.3925013446   |
| H | 1.0 | 2.9578506534  | 0.5314422077  | 0.1208786751  | H | 1.0 | -2.7468211262 | -2.4091814842 | 1.8861582305   |
| H | 1.0 | 3.2904206992  | 1.4691871611  | -1.3615192913 | H | 1.0 | -2.5523710690 | -1.6200717614 | 3.4750095245   |
| H | 1.0 | 2.8257664237  | -0.2447021073 | -1.4996630602 | H | 1.0 | -1.2188565300 | -1.5676895622 | 2.2812402707   |
| C | 6.0 | 1.1080803201  | 2.5815576841  | -0.4170282163 | C | 6.0 | 2.9704865847  | 1.4312231889  | -1.2106006359  |
| H | 1.0 | 0.1066264334  | 3.0426591497  | -0.4799984128 | C | 6.0 | 2.5181827062  | 0.6266542260  | 1.8563352173   |
| H | 1.0 | 1.8084421941  | 3.2415032459  | -0.9733290226 | C | 6.0 | 3.1912352773  | 0.8502516331  | -2.6278876974  |
| H | 1.0 | 1.4218598914  | 2.5825404594  | 0.6447604809  | H | 1.0 | 4.0815266880  | 0.1985637385  | -2.7034338192  |
| C | 6.0 | 1.8383453395  | -1.8528992732 | 5.0350099730  | H | 1.0 | 3.3584547314  | 1.7020515377  | -3.3222955410  |
| C | 6.0 | 3.6212102208  | 0.5162715857  | 3.8248284358  | H | 1.0 | 2.3036953047  | 0.2963945618  | -2.9994931872  |
| C | 6.0 | 0.5246011950  | -2.1463828980 | 5.7985055382  | C | 6.0 | 1.8413503487  | 2.4750741730  | -1.3478766612  |
| H | 1.0 | 0.4635667086  | -1.6512406886 | 6.7857570849  | H | 1.0 | 1.6058287944  | 3.0033429639  | -0.4068730569  |
| H | 1.0 | 0.4735567167  | -3.2407070330 | 5.9853474393  | H | 1.0 | 0.9126720940  | 2.0072479439  | -1.7382180931  |
| H | 1.0 | -0.3707677009 | -1.8713479356 | 5.2016619314  | H | 1.0 | 2.1567067272  | 3.2431222631  | -0.28664792260 |
| C | 6.0 | 1.8491108868  | -2.8188099591 | 3.8316413516  | C | 6.0 | 4.2565386455  | 2.1468727907  | -0.7397873074  |
| H | 1.0 | 2.7466379577  | -2.7281922599 | 3.1937971593  | H | 1.0 | 4.1150185312  | 2.6940833466  | 0.2125452789   |
| H | 1.0 | 0.9408987749  | -2.6967404503 | 3.2029071862  | H | 1.0 | 4.5344210933  | 2.9043350320  | -1.5047616677  |
| H | 1.0 | 1.8295372797  | -3.8590105528 | 4.2224708785  | H | 1.0 | 5.1204010511  | 1.4666877162  | -0.6264984884  |
| C | 6.0 | 3.0524359558  | -2.1808060674 | 5.9348528368  | C | 6.0 | 1.9101524355  | 2.0411802456  | 1.9903463697   |
| H | 1.0 | 4.0118243366  | -2.1453706657 | 5.3822955524  | H | 1.0 | 1.8333866527  | 2.2820305722  | 3.0726855730   |
| H | 1.0 | 2.9373276109  | -3.2216815797 | 6.3080514297  | H | 1.0 | 0.8879701446  | 2.1090747255  | 1.5684574063   |
| H | 1.0 | 3.1359907665  | -1.5253394023 | 6.8204412637  | H | 1.0 | 2.5357625350  | 2.8299446564  | 1.5296709819   |
| C | 6.0 | 4.2078073052  | -0.5886163196 | 2.9188830799  | C | 6.0 | 3.9609463020  | 0.6574486824  | 2.4121835398   |
| H | 1.0 | 5.1497047932  | -0.2088256315 | 2.4666782759  | H | 1.0 | 3.9261501630  | 1.0496330227  | 3.4522712894   |
| H | 1.0 | 3.5277982160  | -0.8539827778 | 2.0846603225  | H | 1.0 | 4.6321122870  | 1.3222946990  | 1.8364214689   |
| H | 1.0 | 4.4663167023  | -1.5120964293 | 3.4716982101  | H | 1.0 | 4.4246473089  | -0.3459245775 | 2.4673229217   |
| C | 6.0 | 4.6114147948  | 0.7944398707  | 4.9780165518  | C | 6.0 | 1.6543664100  | -0.3260858466 | 2.7156365088   |
| H | 1.0 | 5.6024370892  | 1.0357649241  | 4.5348026766  | H | 1.0 | 1.6747863796  | 0.0262527838  | 3.7695352683   |
| H | 1.0 | 4.7587613398  | -0.0740468064 | 5.6473834446  | H | 1.0 | 2.0130745507  | -1.3708371763 | 2.7102519257   |
| H | 1.0 | 4.3167547619  | 1.6664170547  | 5.5920026411  | H | 1.0 | 0.5962910176  | -0.3251875547 | 2.3826851255   |
| C | 6.0 | 3.4782973656  | 1.7892913472  | 2.9568983994  | C | 6.0 | -3.5451713676 | -1.0987231473 | -1.1156518998  |
| H | 1.0 | 4.4789961995  | 2.0665120610  | 2.5602193121  | C | 6.0 | -2.8741284851 | -1.3351201929 | -2.4917405480  |
| H | 1.0 | 3.0930890026  | 2.6623267729  | 3.5139021950  | H | 1.0 | -3.6027345418 | -1.8731295010 | -3.1365900393  |
| H | 1.0 | 2.8150636089  | 1.6162362395  | 2.0840321537  | H | 1.0 | -1.9702155939 | -1.9701898191 | -2.4165853566  |
| C | 6.0 | -1.8762232284 | 0.3246328142  | -0.5139576578 | H | 1.0 | -2.5929236778 | -0.4060302362 | -3.0195029858  |
| C | 6.0 | -2.8243229289 | -0.2136652548 | 0.5857057881  | C | 6.0 | -3.7744750122 | -2.4906965119 | -4.4808601111  |
| H | 1.0 | -3.8700427810 | -0.0437301572 | 0.2483741059  | H | 1.0 | -4.3455581404 | -3.1023542394 | -1.2119100648  |
| H | 1.0 | -2.6908262173 | 0.3140783379  | 1.5504866462  | H | 1.0 | -4.3745407123 | -2.4596442445 | 0.4477771337   |
| H | 1.0 | -2.7124664584 | -1.2950309230 | 0.7826568883  | H | 1.0 | -2.8307060096 | -3.0308949796 | -0.2799227442  |
| C | 6.0 | -2.1550292090 | 1.8402902705  | -0.6458604334 | C | 6.0 | -4.9315188834 | -0.4475025216 | -1.3355806847  |
| H | 1.0 | -3.2440200583 | 1.9714218153  | -0.8232573558 | H | 1.0 | -5.5594496319 | -1.1706745173 | -1.9001406755  |
| H | 1.0 | -1.6325989573 | 2.3119338106  | -1.4991903218 | H | 1.0 | -4.8860535481 | -0.4754469364 | -1.9437551512  |
| H | 1.0 | -1.9125337947 | 2.4016977123  | 0.2760640111  | H | 1.0 | -5.4627259844 | -0.2256636603 | -0.3907258581  |
| C | 6.0 | -2.2406758235 | -0.3426930045 | -1.8607365865 | C | 6.0 | 3.5606177268  | -1.5409806681 | -0.2563302566  |
| H | 1.0 | -3.2817262156 | -0.0450946216 | -2.1125915795 | C | 6.0 | 3.4180301278  | -2.5931185321 | 0.9200713448   |
| H | 1.0 | -2.2299349320 | -1.4480174164 | -1.8131923762 | H | 1.0 | 3.8223429256  | -2.1439078320 | 1.8726301650   |
| H | 1.0 | -1.5979300529 | -0.0185659546 | -2.7010678962 | H | 1.0 | 4.0130682121  | -3.4403865322 | 0.6688587835   |
| C | 6.0 | 1.2729678386  | 1.1474424944  | 5.9016394768  | H | 1.0 | 2.3756543920  | -2.8671922107 | 1.0794358758   |
| C | 6.0 | 1.6319871264  | 2.6266782978  | 5.6209283507  | C | 6.0 | 5.0538385723  | -1.1579797671 | -0.3769178748  |
| H | 1.0 | 2.7216413893  | 2.8198907850  | 5.6336953104  | H | 1.0 | 5.6353195839  | -2.1002251651 | -0.4763938939  |
| H | 1.0 | 1.1950681387  | 3.2405566354  | 6.4380447356  | H | 1.0 | 5.4422411377  | -0.6303113792 | 0.5149094503   |
| H | 1.0 | 1.2110953016  | 3.0073893284  | 4.6726598247  | H | 1.0 | 5.2762950992  | -0.5504686475 | -1.2741518245  |
| C | 6.0 | 1.9419965199  | 0.7455478494  | 7.2374505896  | C | 6.0 | 3.1227011652  | -2.2774278081 | -1.5457673536  |
| H | 1.0 | 1.6211034073  | 1.4774765487  | 8.0105967903  | H | 1.0 | 3.2687786512  | -1.6808340845 | -2.4626677484  |
| H | 1.0 | 3.0475271575  | 0.7766195304  | 7.2015512586  | H | 1.0 | 2.0643933234  | -2.5926539464 | -1.5034802343  |
| H | 1.0 | 1.6251185275  | -0.2522331842 | 7.5936328356  | H | 1.0 | 3.7397709374  | -3.1962157222 | -1.6493503674  |
| C | 6.0 | -0.2635727296 | 1.0639546124  | 6.0768492518  | C | 6.0 | -0.0370246588 | -2.8263894586 | 0.1463025284   |
| H | 1.0 | -0.6193572905 | 0.0615198213  | 6.3709023554  | H | 1.0 | 0.2861887586  | -2.6472803311 | 1.1892634622   |
| H | 1.0 | -0.8125053387 | 1.3656648293  | 5.1658654190  | H | 1.0 | -1.0754278699 | -3.1966553053 | 0.1233920941   |
| H | 1.0 | -0.5537212338 | 1.7664196105  | 6.8881149719  | H | 1.0 | 0.6317756214  | -3.5632499569 | -0.3366318413  |
| C | 6.0 | -0.3913773651 | 2.4282149077  | 2.7092597231  | H | 1.0 | 0.0042116571  | -1.9770635660 | -1.4302514760  |
| H | 1.0 | 0.6531085846  | 2.7946060513  | 2.6619011330  |   |     |               |               |                |
| H | 1.0 | -0.9404167326 | 2.7379287997  | 1.8034548340  |   |     |               |               |                |
| H | 1.0 | -0.8825745254 | 2.8671690005  | 3.5993247556  |   |     |               |               |                |
| H | 1.0 | -1.1460886121 | 1.0668748507  | 3.1071091439  |   |     |               |               |                |

### Transition state TS1In:

|    | ATOM | CHARGE        | X             | Y             | Z |
|----|------|---------------|---------------|---------------|---|
| P  | 15.0 | -2.5193109259 | 0.1034595342  | 0.0249289100  |   |
| IN | 49.0 | 0.0222870689  | -0.7678527052 | -0.6744438085 |   |
| P  | 15.0 | 2.5281682620  | 0.0900030969  | 0.0416570313  |   |
| C  | 6.0  | -2.7349188186 | 1.8748063036  | -0.7691797006 |   |
| C  | 6.0  | -4.0519041912 | 2.5831796851  | -0.3781767554 |   |
| H  | 1.0  | -4.9556625348 | 2.0117640005  | -0.6601494995 |   |
| H  | 1.0  | -4.0988534486 | 3.5547926741  | -0.9172048087 |   |
| H  | 1.0  | -4.1084370868 | 2.8174801868  | 0.7024093659  |   |
| C  | 6.0  | -1.5413874312 | 2.7518130092  | -0.3263614367 |   |
| H  | 1.0  | -0.5765818124 | 2.2745588282  | -0.5868617751 |   |
| H  | 1.0  | -1.5398683676 | 2.9888963719  | 0.7521815926  |   |
| H  | 1.0  | -1.5886841287 | 3.7173487052  | -0.8749205793 |   |
| C  | 6.0  | -2.6576362979 | 1.7671146301  | -2.3106855819 |   |
| H  | 1.0  | -3.5359450055 | 1.2625408983  | -2.7553348646 |   |
| H  | 1.0  | -1.7382394990 | 1.2455637299  | -2.6511032237 |   |
| H  | 1.0  | -2.6285580057 | 2.7972618155  | -2.7259658014 |   |
| C  | 6.0  | -3.0271668337 | 0.1843619071  | 1.9181411289  |   |
| C  | 6.0  | -4.5539702491 | 0.2352897473  | 2.1514273663  |   |
| H  | 1.0  | -5.0659357167 | -0.6914841609 | 1.8284608371  |   |
| H  | 1.0  | -5.0419783788 | 1.0970559251  | 1.6588809977  |   |
| H  | 1.0  | -4.7337987013 | 0.3356269779  | 3.2442257851  |   |
| C  | 6.0  | -2.3776730176 | 1.4237317164  | 2.5746298673  |   |

### Transition state TS1Ga:

|    | ATOM | CHARGE        | X             | Y             | Z |
|----|------|---------------|---------------|---------------|---|
| P  | 15.0 | -2.3713550016 | 0.0237130382  | 0.0044937055  |   |
| GA | 31.0 | 0.0163267222  | -0.5278349590 | -0.8231740215 |   |
| P  | 15.0 | 2.3865835133  | 0.0124935255  | 0.0107592490  |   |
| C  | 6.0  | -2.6120458864 | 1.8907079566  | -0.5198225205 |   |
| C  | 6.0  | -3.9488761201 | 2.5277344520  | -0.0766594467 |   |
| H  | 1.0  | -4.8404965745 | 2.0140376989  | -0.4786768063 |   |
| H  | 1.0  | -3.9736145252 | 3.5716390608  | -0.4582613491 |   |
| H  | 1.0  | -4.0444220173 | 2.5905961622  | 1.0247311175  |   |
| C  | 6.0  | -1.4556041605 | 2.7117636286  | 0.1014722891  |   |
| H  | 1.0  | -0.4734250517 | 2.2611983601  | -0.1177302264 |   |
| H  | 1.0  | -1.5530938995 | 2.8405344868  | 1.1938950232  |   |
| H  | 1.0  | -1.4609811796 | 3.7265997899  | -0.3513705898 |   |
| C  | 6.0  | -2.4694249119 | 2.0032686933  | -2.0564421798 |   |
| H  | 1.0  | -3.3203150677 | 1.5624630673  | -2.6100135100 |   |
| H  | 1.0  | -             |               |               |   |

|   |     |               |               |               |   |     |               |               |               |
|---|-----|---------------|---------------|---------------|---|-----|---------------|---------------|---------------|
| H | 1.0 | -1.2809505289 | 1.4614056666  | 2.4121664692  | H | 1.0 | -2.6813164223 | -1.1746488139 | 2.8629610738  |
| H | 1.0 | -2.5408114702 | 1.3579827195  | 3.6719842953  | H | 1.0 | -2.3883535069 | 0.2214306938  | 3.9366588014  |
| H | 1.0 | -2.8217861481 | 2.3810106489  | 2.2414721172  | H | 1.0 | -1.1511461550 | -0.2602581052 | 2.7346041347  |
| C | 6.0 | -2.4395568073 | -1.0548843437 | 2.6293566707  | C | 6.0 | 3.1277287818  | 0.9025562846  | -1.6510035702 |
| H | 1.0 | -2.8520943122 | -2.0123936241 | 2.2654419780  | C | 6.0 | 2.5582905948  | 1.5930346696  | 1.4281616206  |
| H | 1.0 | -2.6761051371 | -0.9822893889 | 3.7129430797  | C | 6.0 | 3.4178245180  | -0.2657634176 | -2.6243263194 |
| H | 1.0 | -1.3385314327 | -1.0981748458 | 2.5267579900  | H | 1.0 | 4.3229466831  | -0.8398054413 | -2.3513094235 |
| C | 6.0 | 3.0592900568  | 1.2546843875  | -1.4381784487 | H | 1.0 | 3.6010000090  | 0.1664202904  | -3.6315485767 |
| C | 6.0 | 2.6374656726  | 1.0550762683  | 1.7303536103  | H | 1.0 | 2.5634248468  | -0.9683923242 | -2.7223621697 |
| C | 6.0 | 3.2630987969  | 0.3947997370  | -2.7066938768 | C | 6.0 | 1.9820597312  | 1.7312194732  | -2.2761627466 |
| H | 1.0 | 4.1534868770  | -0.2591542711 | -2.6543472183 | H | 1.0 | 1.7526821955  | 2.6552018527  | -1.7160976009 |
| H | 1.0 | 3.4130512297  | 1.0790257943  | -3.5690951850 | H | 1.0 | 1.0528568485  | 1.1314774520  | -2.3721194622 |
| H | 1.0 | 2.3697297649  | -0.2252008294 | -2.9311620115 | H | 1.0 | 2.2881555706  | 2.0333719181  | -3.3007242457 |
| C | 6.0 | 1.9119354050  | 2.2395433044  | -1.7656768863 | C | 6.0 | 4.3881199019  | 1.7924212515  | -1.5423606279 |
| H | 1.0 | 1.6771444815  | 2.9382046822  | -0.9432709977 | H | 1.0 | 4.2148671274  | 2.7133555854  | -0.9521246004 |
| H | 1.0 | 0.9821200982  | 1.7125271554  | -2.0708870836 | H | 1.0 | 4.6745709711  | 2.1186681261  | -2.5659552734 |
| H | 1.0 | 2.2277878808  | 2.8535550411  | -2.6367868814 | H | 1.0 | 5.2590487422  | 1.2617071363  | -1.1141994569 |
| C | 6.0 | 4.3436332745  | 2.0653940026  | -1.1463409938 | C | 6.0 | 1.9092372077  | 2.8731920444  | 0.8556212544  |
| H | 1.0 | 4.2047687945  | 2.8038382940  | -0.3328268200 | H | 1.0 | 1.7796054369  | 3.5969013819  | 1.6891728194  |
| H | 1.0 | 4.6075269259  | 2.6406773388  | -2.0602721358 | H | 1.0 | 0.9057017324  | 2.6829725277  | 0.4255122204  |
| H | 1.0 | 5.2142052690  | 1.4299156854  | -0.8989035603 | H | 1.0 | 2.5331349422  | 3.3742289913  | 0.0905717406  |
| C | 6.0 | 2.0017382719  | 2.4539507680  | 1.5667995258  | C | 6.0 | 3.96958883925 | 1.9425172437  | 1.9545960696  |
| H | 1.0 | 1.9364474020  | 2.9270877477  | 2.5705398970  | H | 1.0 | 3.8729754686  | 2.7883510490  | 2.6695275440  |
| H | 1.0 | 0.9705273882  | 2.4052698655  | 1.1619970457  | H | 1.0 | 4.6617680864  | 2.2684502339  | 1.1552774751  |
| H | 1.0 | 2.6010038687  | 3.1319357766  | 0.9295395942  | H | 1.0 | 4.4384775796  | 1.1057189223  | 2.5073383836  |
| C | 6.0 | 4.0772886184  | 1.2195430788  | 2.2665239004  | C | 6.0 | 1.6732976865  | 1.1215865199  | 2.6061835539  |
| H | 1.0 | 4.0340332507  | 1.8167195628  | 3.2031899466  | H | 1.0 | 1.5891063707  | 1.9514618384  | 3.3410733764  |
| H | 1.0 | 4.7393987906  | 1.7600098805  | 1.5636454552  | H | 1.0 | 2.0793951765  | 0.2466244474  | 3.1442126603  |
| H | 1.0 | 4.5517417188  | 0.2528872433  | 2.5217784823  | H | 1.0 | 0.6461354402  | 0.8674255927  | 2.2741222743  |
| C | 6.0 | 1.7785933470  | 0.2856134470  | 2.7618751918  | C | 6.0 | -3.7664443596 | -1.2690451972 | -0.3305944926 |
| H | 1.0 | 1.7570189761  | 0.8656611743  | 3.7095658531  | C | 6.0 | -3.1851353049 | -2.0753523172 | -1.5179011637 |
| H | 1.0 | 2.1678460832  | -0.7206901240 | 2.9999703131  | H | 1.0 | -3.8891106021 | -2.9032991670 | -1.7504454750 |
| H | 1.0 | 0.7308251292  | 0.1744359025  | 2.4131934393  | H | 1.0 | -2.2102706546 | -2.5363790485 | -1.2672398982 |
| C | 6.0 | -3.6801410069 | -1.1700466638 | -0.9148141944 | H | 1.0 | -3.0606015482 | -1.4834691237 | -2.4425375544 |
| C | 6.0 | -3.0523169456 | -1.5509024593 | -2.2786789412 | C | 6.0 | -3.8695123050 | -2.2448752574 | 0.8643617375  |
| H | 1.0 | -3.7330400881 | -2.2747678590 | -2.7770137208 | H | 1.0 | -4.4445891395 | -3.1334146720 | 0.5253904675  |
| H | 1.0 | -2.0666105912 | -2.0455123686 | -2.1718761697 | H | 1.0 | -4.4144490059 | -1.8245373509 | 1.7311847768  |
| H | 1.0 | -2.9257765282 | -0.6957878618 | -2.9662841298 | H | 1.0 | -2.8794454693 | -2.6066639712 | 1.2030799070  |
| C | 6.0 | -3.7903226685 | -2.4752402399 | -0.0944021520 | H | 1.0 | -5.1857098453 | -0.7779290915 | -0.6950513172 |
| H | 1.0 | -4.3559133346 | -3.2141349018 | -0.7021754390 | C | 1.0 | -5.8286086707 | -1.6716411753 | -0.8532315842 |
| H | 1.0 | -4.3441902598 | -2.3536316343 | 0.8558752690  | H | 1.0 | -5.2138778944 | -0.1991555727 | -1.6383652955 |
| H | 1.0 | -2.8001972455 | -2.9233255222 | 0.1217301563  | C | 1.0 | -5.6588796280 | -0.1762424551 | 0.1042354890  |
| C | 6.0 | -5.1001145405 | -0.6117356978 | -1.1638612310 | H | 6.0 | 3.7285938174  | -1.2730048580 | 0.6037007342  |
| H | 1.0 | -5.7088139449 | -1.4167603498 | -1.6304628018 | C | 6.0 | 3.4892418986  | -1.6136812254 | 2.0929596096  |
| H | 1.0 | -5.1059129042 | 0.2402828093  | -1.8709404327 | H | 1.0 | 3.8510000649  | -0.8280806020 | 2.7838204793  |
| H | 1.0 | -5.6220019003 | -0.3048771664 | -0.2381576135 | H | 1.0 | 4.0664694699  | -2.5341524426 | 2.3258398414  |
| C | 6.0 | 3.7100520222  | -1.4746521287 | 0.0772711740  | H | 1.0 | 2.4251974652  | -1.8316389258 | 2.3097314533  |
| C | 6.0 | 3.5674275617  | -2.2080964405 | 1.4317276690  | C | 6.0 | 5.2249113090  | -0.9433217975 | 0.3986165456  |
| H | 1.0 | 3.9931404552  | -1.6413107334 | 2.2817157100  | H | 1.0 | 5.8217869054  | -1.7953999662 | 0.7917021467  |
| H | 1.0 | 4.1409726340  | -3.1570489067 | 1.3611304543  | H | 1.0 | 5.5511508570  | -0.0376438957 | 0.9445839850  |
| H | 1.0 | 2.5200535208  | -2.4772336859 | 1.6633676494  | H | 1.0 | 5.4993028058  | -0.8298598534 | -0.6679335339 |
| C | 6.0 | 5.1987838242  | -1.1121164997 | -0.1272779841 | C | 6.0 | 3.3640964768  | -2.5384068438 | -0.2110042704 |
| H | 1.0 | 5.7941934876  | -2.0455207776 | -0.0228302810 | H | 1.0 | 3.5019506554  | -2.4233845532 | -1.3001435218 |
| H | 1.0 | 5.5819646167  | -0.3963463797 | 0.6249942831  | H | 1.0 | 2.3268125849  | -2.8747884189 | -0.0173384307 |
| H | 1.0 | 5.4144401377  | -0.7130630034 | -1.1370938562 | H | 1.0 | 4.0381367322  | -3.3594756674 | 0.1168583182  |
| C | 6.0 | 3.2736380829  | -2.4694994539 | -1.0275339243 | C | 6.0 | -0.0282914871 | -2.7381181219 | 1.3645836922  |
| H | 1.0 | 3.3688839309  | -2.0691688990 | -2.0520961720 | H | 1.0 | 0.1205692692  | -2.1544802098 | 2.2954758718  |
| H | 1.0 | 2.2358144173  | -2.8284267535 | -0.8880308597 | H | 1.0 | -1.0234583179 | -3.2199338616 | 1.3634314824  |
| C | 6.0 | 3.9367353676  | -3.3594718020 | -0.9628094546 | H | 1.0 | 0.7623160187  | -3.5039522649 | 1.2542824629  |
| C | 6.0 | 0.0254171579  | -2.8542521249 | 0.9499916494  | H | 1.0 | 0.0421607367  | -2.5429432645 | -0.8179303106 |
| H | 1.0 | 0.2759244207  | -2.3810006005 | 1.9203317098  |   |     |               |               |               |
| H | 1.0 | -0.9840728610 | -3.3030131819 | 0.9832809208  |   |     |               |               |               |
| H | 1.0 | 0.7776085789  | -3.6212779889 | 0.6864295010  |   |     |               |               |               |
| H | 1.0 | 0.0053289284  | -2.4689233299 | -0.9603741458 |   |     |               |               |               |

## Products of the reactions with methane

### Product 1B:

### Transition state TS1T:

| ATOM | CHARGE | X             | Y             | Z             | ATOM | CHARGE | X             | Y             | Z             |
|------|--------|---------------|---------------|---------------|------|--------|---------------|---------------|---------------|
| P    | 15.0   | -2.5390057920 | 0.1986320198  | 0.1016480873  | P    | 15.0   | -2.0156900767 | -0.0379868972 | -0.0382516041 |
| TL   | 81.0   | 0.0095091933  | -0.8291134800 | -0.5279577476 | B    | 5.0    | 0.0094334317  | -0.6684199894 | -0.4939245294 |
| P    | 15.0   | 2.5456366677  | 0.1923403827  | 0.0761562437  | P    | 15.0   | 2.0144570651  | -0.0343909090 | -0.0188884352 |
| C    | 6.0    | -2.7789709535 | 1.6533174259  | -1.1753634364 | C    | 6.0    | -2.3275604930 | 1.8713426206  | -0.3166187111 |
| C    | 6.0    | -4.0734768610 | 2.4695690716  | -0.9512733368 | C    | 6.0    | -3.7480412890 | 2.4065811789  | -0.0110058275 |
| H    | 1.0    | -4.9921303679 | 1.8570665269  | -1.0054620326 | H    | 1.0    | -4.5510391953 | 1.9404803923  | -0.6057235097 |
| H    | 1.0    | -4.1408571003 | 3.2363090324  | -1.7535513238 | H    | 1.0    | -3.7495141201 | 3.4922365075  | -0.2513250608 |
| H    | 1.0    | -4.0708560962 | 3.0156038492  | 0.0122382802  | H    | 1.0    | -4.0051008528 | 2.3236643288  | 1.0625288617  |
| C    | 6.0    | -1.5660946340 | 2.6073368837  | -1.0758200236 | C    | 6.0    | -1.3700409344 | 2.6556354565  | 0.6138505392  |
| H    | 1.0    | -0.6076429184 | 2.0759581658  | -1.2421250751 | H    | 1.0    | -0.3834487038 | 2.1769417749  | 0.7194204145  |
| H    | 1.0    | -1.5099139809 | 3.1459948920  | -0.1137945660 | H    | 1.0    | -1.7944249936 | 2.7907948186  | 1.6244652181  |
| H    | 1.0    | -1.6561427828 | 3.3734478135  | -1.8761636049 | H    | 1.0    | -1.2049948846 | 3.6699218888  | 0.1928734852  |
| C    | 6.0    | -2.7764245864 | 1.0741600112  | -2.6087948573 | C    | 6.0    | -1.9862223542 | 1.2889998384  | -1.7954340732 |
| H    | 1.0    | -3.6737358669 | 0.4673219187  | -2.8340555483 | H    | 1.0    | -2.7636247789 | 1.8304780067  | -2.4960939235 |
| H    | 1.0    | -1.8707975693 | 0.4625811377  | -2.8063448097 | H    | 1.0    | -1.0181288656 | 1.7594276946  | -2.1191571792 |
| C    | 6.0    | -2.7863263533 | 1.9212747630  | -3.3274240517 | H    | 1.0    | -1.9244430806 | 3.2914781102  | -1.9183061117 |
| C    | 6.0    | -2.8891096452 | 0.8358238921  | 1.9150062313  | C    | 6.0    | -2.7183685006 | -0.5234047935 | -1.7218246969 |
| C    | 6.0    | -4.3957017041 | 0.9833666967  | 2.2302244018  | C    | 6.0    | -4.2643518664 | -0.4778714009 | 1.7940768330  |
| H    | 1.0    | -4.9409878295 | 0.0208482141  | 2.2043830063  | H    | 1.0    | -4.7542825402 | -1.2426204496 | 1.1633030887  |
| H    | 1.0    | -4.9039733504 | 1.6959600958  | 1.5567745707  | H    | 1.0    | -4.6871768363 | 0.5096985580  | 1.5346422216  |
| H    | 1.0    | -4.4941519658 | 1.3810606126  | 3.2638928579  | H    | 1.0    | -4.5610404174 | -0.6946117499 | 2.8431507286  |
| C    | 6.0    | -2.2094724142 | 2.2055701633  | -2.1391626285 | C    | 6.0    | -2.1642251809 | 0.4434625103  | 2.7945885574  |
| H    | 1.0    | -1.1297270169 | 2.1937262157  | 1.8887574932  | H    | 1.0    | -1.0641363851 | 0.5637708993  | 2.7407781066  |
| H    | 1.0    | -2.2887823559 | 2.4537216018  | 3.2195302444  | H    | 1.0    | -2.3971134602 | 0.0204589418  | 3.7953834086  |
| H    | 1.0    | -2.6964188484 | 3.0299030300  | 1.5836241879  | H    | 1.0    | -2.6321539677 | 1.4445644795  | 2.7536508748  |
| C    | 6.0    | -2.2420293996 | -0.1626014461 | 2.9039369918  | C    | 6.0    | -2.2503675085 | -1.9471501936 | 2.1072086215  |

|   |     |               |               |               |   |     |                |               |               |
|---|-----|---------------|---------------|---------------|---|-----|----------------|---------------|---------------|
| H | 1.0 | -2.5626591768 | -2.7277813062 | 1.3913394343  | C | 6.0 | -2.5415194126  | 0.3709058649  | -1.8581234257 |
| H | 1.0 | -2.7020393886 | -2.2039131181 | 3.0900423466  | C | 6.0 | -3.2190614751  | 1.1186097744  | 2.5545669424  |
| H | 1.0 | -1.1530720597 | -2.0056983092 | 2.2291310326  | H | 1.0 | -4.1337313622  | 0.5114231941  | 2.6906414575  |
| C | 6.0 | 2.5838744973  | 1.5759920864  | -0.9941640532 | H | 1.0 | -3.3569285822  | 2.0425783926  | 3.1563354386  |
| C | 6.0 | 2.3947608981  | 0.1819020271  | 1.8800283905  | H | 1.0 | -2.3525213685  | 0.5743398760  | 2.9815675465  |
| C | 6.0 | 2.6505020374  | 1.2531119327  | -2.5077773300 | C | 6.0 | -1.8243344635  | 2.5659250052  | 1.1158414758  |
| H | 1.0 | 3.5105032995  | 0.6165797012  | -2.7811787256 | H | 1.0 | -1.5870100909  | 2.9932591643  | 0.1251740057  |
| H | 1.0 | 2.7700687793  | 2.2105540731  | -3.0581343030 | H | 1.0 | -0.9061068794  | 2.1228726832  | 1.5508129452  |
| H | 1.0 | 1.7232739319  | 0.7722189770  | -2.8787692405 | C | 6.0 | -2.1232818083  | 3.4106378365  | 1.7733107895  |
| C | 6.0 | 1.5565607894  | 2.7131675183  | -0.8432389506 | H | 1.0 | -4.2518258924  | 2.2301438707  | 0.5417503035  |
| H | 1.0 | 1.4354192415  | 3.0637308043  | 0.1968121092  | H | 1.0 | -4.1004750759  | 2.6957712681  | -0.4517394231 |
| H | 1.0 | 0.5687765559  | 2.4344925424  | -1.2467718105 | H | 1.0 | -4.52442477862 | 3.0502556086  | 1.2408974379  |
| H | 1.0 | 1.9179505526  | 3.5804548725  | -1.4372252222 | H | 1.0 | -5.1238951144  | 1.5527163589  | 0.4805243996  |
| C | 6.0 | 3.9476322753  | 2.1376148715  | -0.5216626520 | C | 6.0 | -1.9186601376  | 1.7576621853  | -2.1407231283 |
| H | 1.0 | 3.8908646724  | 2.5833801111  | 0.4907688457  | H | 1.0 | -1.8534564472  | 1.8935096212  | -3.2420288784 |
| H | 1.0 | 4.2291825799  | 2.9601539182  | -1.2140569702 | H | 1.0 | -0.8895353300  | 1.8511102514  | -1.7388016605 |
| H | 1.0 | 4.7729885900  | 1.4055172145  | -0.5353507280 | H | 1.0 | -2.5283143796  | 2.5939258436  | -1.7490904553 |
| C | 6.0 | 1.8496931410  | 1.5430443097  | 2.3684158197  | C | 6.0 | -3.9785406038  | 0.3489325421  | -2.4238253690 |
| H | 1.0 | 1.9443164345  | 1.5781098222  | 3.4750794908  | H | 1.0 | -3.9393809490  | 0.6270011958  | -3.4997563478 |
| H | 1.0 | 0.7774458707  | 1.6820042164  | 2.1311597450  | H | 1.0 | -4.6474126677  | 1.0747928322  | -1.9234960512 |
| C | 1.0 | 2.4157298721  | 2.4065097107  | 1.9692935229  | H | 1.0 | -4.4428566717  | -0.6541391318 | -2.3701598284 |
| C | 6.0 | 3.8939014784  | 0.1078040678  | 2.2524790200  | C | 6.0 | -1.6762249168  | -0.6726312243 | -2.6046343606 |
| H | 1.0 | 3.9861771347  | 0.3054496502  | 3.3424829979  | H | 1.0 | -1.6624380159  | -0.4192749617 | -3.6868033747 |
| H | 1.0 | 4.5086220990  | 0.8646687786  | 1.7317580479  | H | 1.0 | -2.0489563530  | -1.7087048009 | -2.5126666998 |
| H | 1.0 | 4.3342368358  | -0.8909576390 | 2.0735206947  | H | 1.0 | -0.6239092833  | -0.6542739679 | -2.2515504681 |
| C | 6.0 | 1.6351497678  | -0.9230893305 | 2.6509571923  | C | 6.0 | 3.5804618503   | -1.0349232352 | 1.2413670840  |
| H | 1.0 | 1.8083583772  | -0.7762232844 | 3.7390244502  | C | 6.0 | 2.8841652269   | -1.1907312730 | 2.6169300235  |
| H | 1.0 | 1.9728765352  | -1.9449789916 | 2.3998097784  | H | 1.0 | 3.5689012058   | -1.7514702769 | 3.2894720080  |
| H | 1.0 | 0.5425714505  | -0.8663617466 | 2.4817368409  | H | 1.0 | 1.9452088732   | -1.7772599684 | 2.5531762113  |
| C | 6.0 | -3.0911991471 | -1.0236471263 | -1.4121593642 | H | 1.0 | 2.6532772592   | -0.2299372520 | 3.1108312549  |
| C | 6.0 | -2.2888136722 | -1.1358790303 | -2.7313994282 | C | 6.0 | 3.8170243648   | -2.4613980572 | 0.6903281898  |
| H | 1.0 | -2.9586580106 | -1.5827305634 | -3.4973703641 | H | 1.0 | 4.3753184357   | -3.0327414140 | 1.4628794803  |
| H | 1.0 | -1.4060610391 | -1.7959981054 | -2.6399829653 | H | 1.0 | 4.4325062724   | -2.4797256524 | -0.2281481207 |
| H | 1.0 | -1.9495688983 | -0.1589392127 | -3.1224360050 | H | 1.0 | 2.8768003683   | -3.0121788703 | 0.5003635682  |
| C | 6.0 | -3.4963400402 | -2.4609194492 | -0.9901188313 | C | 6.0 | 4.9657520605   | -0.3778963157 | 1.4431452916  |
| H | 1.0 | -4.0572271325 | -2.9016013630 | -1.8420659553 | H | 1.0 | 5.5833139410   | -1.0657828591 | 2.0608660775  |
| H | 1.0 | -4.1763945911 | -2.4884384985 | -0.1189289426 | H | 1.0 | 4.9173841061   | 0.5821829407  | 1.9906326496  |
| H | 1.0 | -2.6484171673 | -3.1428388991 | -0.7939403219 | H | 1.0 | 5.5090803230   | -0.2181183767 | 0.4922953329  |
| C | 6.0 | -4.4232032228 | -0.2942848134 | -1.7200158546 | C | 6.0 | -3.5993012675  | -1.5113224183 | 0.4934952263  |
| H | 1.0 | -4.2853907104 | -0.9220968439 | -2.4442345567 | C | 6.0 | -3.4124449427  | -2.6479751877 | -0.5399284954 |
| H | 1.0 | -4.2873416760 | 0.6910289311  | -2.2016253516 | H | 1.0 | -3.7897123516  | -2.3816713887 | -1.5457115958 |
| H | 1.0 | -5.0714690711 | -0.1725344639 | -0.8317421425 | H | 1.0 | -4.0071820652  | -3.5224686748 | -0.1980753778 |
| C | 6.0 | 3.1714959573  | -1.4918616984 | -0.7217456720 | H | 1.0 | -2.3629638649  | -2.9856641229 | -0.6304118741 |
| C | 6.0 | 3.1603821569  | -2.7188619146 | 0.2286422516  | C | 6.0 | -5.0958059458  | -1.1221660373 | 0.5159141203  |
| H | 1.0 | 3.6472162195  | -2.5093016050 | 1.2004135240  | H | 1.0 | -5.6869192776  | -2.0434677909 | 0.7096512489  |
| H | 1.0 | 3.7606062888  | -3.5187458444 | -0.2552269687 | H | 1.0 | -5.4529578840  | -0.7018841437 | -0.4430328343 |
| C | 6.0 | 2.1579087795  | -3.1364791641 | 0.4182892361  | H | 1.0 | -5.3409236063  | -0.4106564271 | 1.3272528637  |
| C | 6.0 | 4.6599883126  | -1.0852409031 | -0.8657683381 | C | 6.0 | -3.2213587974  | -2.0741926080 | 1.8899837722  |
| H | 1.0 | 5.2086951369  | -1.9839636222 | -1.2227574558 | H | 1.0 | -3.5063170248  | -1.4066956485 | 2.7213449026  |
| H | 1.0 | 5.1336068716  | -0.7786300150 | 0.0849781251  | H | 1.0 | -2.1433024650  | -2.3057421965 | 1.9933413272  |
| H | 1.0 | 4.8277038915  | -0.2966585794 | -1.6213418375 | H | 1.0 | -3.7740414170  | -3.0273477161 | 2.0343027674  |
| C | 6.0 | 2.6805022542  | -1.9242725049 | -2.1397625216 | C | 6.0 | 0.0503513333   | -2.7625068183 | 0.3785310539  |
| H | 1.0 | 1.5975260060  | -1.7923125839 | -2.3134637253 | H | 1.0 | 1.0466305499   | -3.1786897013 | 0.6314775509  |
| H | 1.0 | 2.9116774356  | -3.0002285387 | -2.2890701959 | H | 1.0 | -0.6855170619  | -3.3278299601 | 0.9874044452  |
| H | 1.0 | 3.2081103386  | -1.3736122796 | -2.9404262191 | H | 1.0 | -0.1394110433  | -3.0193010176 | -0.6847221958 |
| C | 6.0 | -0.0416938411 | -2.2741302336 | -0.2685556134 | H | 1.0 | -0.0387502543  | -0.1783776661 | 2.2357542041  |
| H | 1.0 | -1.0386757389 | -2.6863410547 | -0.4997486686 |   |     |                |               |               |
| H | 1.0 | 0.6483215661  | -2.8108200298 | -0.9451803307 |   |     |                |               |               |
| H | 1.0 | 0.1829622922  | -2.6063306091 | 0.7629368233  |   |     |                |               |               |
| H | 1.0 | 0.0172767220  | -0.3204974757 | -1.6684962208 |   |     |                |               |               |

**Product 1Ga:**

|    | ATOM | CHARGE        | X             | Y             | Z |
|----|------|---------------|---------------|---------------|---|
| P  | 15.0 | 2.3946675543  | -0.0490825866 | -0.0009968205 |   |
| GA | 31.0 | -0.0109158501 | 0.9237106463  | -0.5269933774 |   |
| P  | 15.0 | -2.4074816327 | -0.0515374752 | -0.0222175563 |   |
| C  | 6.0  | 2.6310098824  | -1.8173500966 | -0.7896874427 |   |
| C  | 6.0  | 3.9735648303  | -2.5053687963 | -0.4540691815 |   |
| H  | 1.0  | 4.8606887494  | -1.9266536146 | -0.7675909374 |   |
| H  | 1.0  | 4.0104057795  | -3.4777391920 | -0.9928751509 |   |
| H  | 1.0  | 4.0695482208  | -2.7397959142 | -0.6242906626 |   |
| C  | 6.0  | 1.4882739240  | -2.7273907251 | -0.2854038935 |   |
| H  | 1.0  | 0.4970545344  | -2.2635419584 | -0.4370173107 |   |
| H  | 1.0  | 1.5880560883  | -3.006898354  | -0.7778192685 |   |
| H  | 1.0  | 1.5018363299  | -3.6705413878 | -0.8735380392 |   |
| C  | 6.0  | 2.4734478181  | -1.7041207118 | -2.3261031091 |   |
| H  | 1.0  | 3.3009247575  | -1.1541259100 | -2.8123025727 |   |
| H  | 1.0  | 1.5151137874  | -1.2273787671 | -2.6181624360 |   |
| H  | 1.0  | 2.4762527482  | -2.7318111141 | -2.7484430277 |   |
| C  | 6.0  | 2.9032705175  | -0.1052296799 | 1.8822464284  |   |
| C  | 6.0  | 4.4297794252  | -0.1940009303 | 2.1143976867  |   |
| H  | 1.0  | 4.9770588426  | 0.6994636369  | 1.7592787134  |   |
| H  | 1.0  | 4.8839217202  | -1.0885623521 | 1.5901588808  |   |
| H  | 1.0  | 4.6110196703  | -0.2659085768 | 3.2090143890  |   |
| C  | 6.0  | 2.2387484690  | -1.3195259646 | 2.5708670433  |   |
| H  | 1.0  | 1.1469306849  | -1.3726820712 | 2.3853919656  |   |
| H  | 1.0  | 2.3791100387  | -1.2142618989 | 3.6683466075  |   |
| H  | 1.0  | 2.6980303481  | -2.2837961297 | 2.2803678522  |   |
| C  | 6.0  | 2.3482344922  | 1.1642151818  | 2.5710673729  |   |
| H  | 1.0  | 2.7610871252  | 2.1046070161  | 2.1658761530  |   |
| H  | 1.0  | 2.6145602612  | 1.1240556850  | 3.6494704954  |   |
| H  | 1.0  | 1.2436414678  | 1.2163132173  | 2.5060856123  |   |
| C  | 6.0  | -2.9513957680 | -1.3105994472 | -1.4169578917 |   |
| C  | 6.0  | -2.5561929940 | -0.8828676205 | 1.7298362921  |   |
| C  | 6.0  | -3.1775532328 | -0.5544442206 | -2.7481106863 |   |
| H  | 1.0  | -4.0785602542 | 0.0862948511  | -2.7357751677 |   |
| H  | 1.0  | -3.3281377583 | -1.3101157762 | -3.5488024970 |   |

**Product 1A1:**

|     | ATOM | CHARGE        | X             | Y             | Z |
|-----|------|---------------|---------------|---------------|---|
| P   | 15.0 | 2.3955103259  | 0.0085849381  | 0.0562398321  |   |
| AL  | 13.0 | -0.0171723272 | -0.8131729621 | 0.7646344486  |   |
| P   | 15.0 | -2.4120888155 | -0.0160571119 | 0.0453043741  |   |
| C   | 6.0  | 2.6383517973  | 1.9013663213  | 0.4504306258  |   |
| C   | 6.0  | 3.9807001949  | 2.5029388861  | -0.0243103728 |   |
| H   | 1.0  | 4.8660726967  | 2.0065177380  | 0.4117139303  |   |
| H   | 1.0  | 4.0122562085  | 3.5679813993  | 0.2938038820  |   |
| H   | 1.0  | 4.0816672414  | 2.4981232371  | -1.1272227128 |   |
| C   | 6.0  | 1.4939370151  | 2.6872898441  | -0.2301060289 |   |
| H   | 1.0  | 0.5032514668  | 2.2454348618  | -0.0170384324 |   |
| H   | 1.0  | 1.6121592252  | 2.7697496084  | -1.3249307971 |   |
| H   | 1.0  | 1.4823466955  | 3.7217718120  | 0.1757203516  |   |
| C   | 6.0  | 2.4924522160  | 2.1115602586  | 1.9782196145  |   |
| H   | 1.0  | 3.3349229960  | 1.6876640437  | 2.5570541842  |   |
| H   | 1.0  | 1.5464413300  | 1.6935638653  | 2.3799644917  |   |
| H   | 1.0  | 2.4849351787  | 3.2050415252  | 2.1761543059  |   |
| C   | 6.0  | 2.8909791283  | -0.3453423671 | -1.7959369149 |   |
| C   | 6.0  | 4.4162244066  | -0.3236489200 | -2.0492049120 |   |
| H   | 1.0  | 4.9543503399  | -1.1313041080 | -1.5184152587 |   |
| H   | 1.0  | 4.8842287954  | 0.6423072739  | -1.7807110502 |   |
| H   | 1.0  | 4.5936726858  | -0.4806003011 | -3.1356862571 |   |
| C   | 6.0  | 2.2318884491  | 0.7031841134  | -2.7212303214 |   |
| H   | 1.0  | 1.1402847846  | 0.7986838732  | -2.5502277603 |   |
| H   | 1.0  | 2.3694505118  | 0.3719898896  | -3.7731108890 |   |
| H</ |      |               |               |               |   |

|   |     |               |               |               |   |     |               |               |               |
|---|-----|---------------|---------------|---------------|---|-----|---------------|---------------|---------------|
| H | 1.0 | -2.2998691583 | 0.0586218215  | -3.0362130820 | H | 1.0 | 2.2977026645  | 2.6583400984  | -2.8565391640 |
| C | 6.0 | -1.7909273018 | -2.2973080909 | -1.6722380887 | C | 6.0 | 4.3881395041  | 2.0796078121  | -1.2000137249 |
| H | 1.0 | -1.5652515167 | -2.9414341462 | -0.8038796453 | H | 1.0 | 4.1833013662  | 2.8684498568  | -0.4500752010 |
| H | 1.0 | -0.8668586357 | -1.7708435095 | -1.9838656980 | H | 1.0 | 4.6805570797  | 2.5991008163  | -2.1387182974 |
| H | 1.0 | -2.0781489207 | -2.9704720887 | -2.5093718526 | H | 1.0 | 5.2660719016  | 1.4970532604  | -0.8625314060 |
| C | 6.0 | -4.2245145427 | -2.1145078620 | -1.0659570578 | C | 6.0 | 1.9533148880  | 2.5819685149  | 1.3657820799  |
| H | 1.0 | -4.0791581881 | -2.7916202971 | -0.2017954615 | H | 1.0 | 1.8229424453  | 3.1071417055  | 2.3363401409  |
| H | 1.0 | -4.4790167171 | -2.7581936407 | -1.9362877481 | H | 1.0 | 0.9500296855  | 2.4931936182  | 0.9009185945  |
| H | 1.0 | -5.1042917898 | -1.4752137701 | -0.8659168377 | H | 1.0 | 2.5799639321  | 3.2328162658  | 0.7267537796  |
| C | 6.0 | -1.9143612656 | -2.2883892096 | 1.6859415335  | C | 6.0 | 4.0058894226  | 1.4190860050  | 2.2366756252  |
| H | 1.0 | -1.8787945238 | -2.6877579609 | 2.7227074360  | H | 1.0 | 3.9221107935  | 2.0907730485  | 3.1193614929  |
| H | 1.0 | -0.8725210678 | -2.2667151452 | 1.3075569751  | H | 1.0 | 4.7013754450  | 1.9016725760  | 1.5240829251  |
| H | 1.0 | -2.4941254874 | -3.0128958632 | 1.0824703055  | H | 1.0 | 4.4693827809  | 0.4801290551  | 2.5957035930  |
| C | 6.0 | -3.9998768602 | -1.0161416756 | 2.2624302620  | C | 6.0 | 1.6967630506  | 0.5006053567  | 2.6930613350  |
| H | 1.0 | -3.9642506644 | -1.5361458121 | 3.2443588811  | H | 1.0 | 1.6638041982  | 1.1254780543  | 3.6116415826  |
| H | 1.0 | -4.6484973467 | -1.6171511249 | 1.5971529930  | H | 1.0 | 2.0569420594  | -0.5009532914 | 2.9878983530  |
| H | 1.0 | -4.4870929366 | -0.0376403577 | 2.4361834459  | H | 1.0 | 0.6533115624  | 0.3969136593  | 2.3289432855  |
| C | 6.0 | -1.7163784976 | -0.0352271998 | 2.7155777783  | C | 6.0 | -3.7763606120 | -1.2833514886 | -0.5635830391 |
| H | 1.0 | -1.6919987214 | -0.5502581378 | 3.7002746941  | C | 6.0 | -3.1714088908 | -1.9724662761 | -1.8125369358 |
| H | 1.0 | -2.1219680973 | 0.9784614982  | 2.8835444726  | H | 1.0 | -3.8650862186 | -2.7793905966 | -2.1330822567 |
| H | 1.0 | -0.6665954811 | 0.0675081341  | 2.3710495530  | H | 1.0 | -2.1990645029 | -2.4578623806 | -1.5887519323 |
| C | 6.0 | 3.5707613765  | 1.2237452328  | -0.9412919722 | H | 1.0 | -3.0321988824 | -1.2961763964 | -2.6745138102 |
| C | 6.0 | 2.8455491137  | 1.6995759940  | -2.2253977831 | C | 6.0 | -3.9067008622 | -2.3753214484 | 0.5251601310  |
| H | 1.0 | 3.5476645911  | 2.3367651677  | -2.8057653506 | H | 1.0 | -4.4855348546 | -3.2207106112 | 0.0450753531  |
| H | 1.0 | 1.9592542697  | 2.3253193191  | -1.9978791030 | H | 1.0 | -4.4606693937 | -2.4533855821 | 1.4209997421  |
| H | 1.0 | 2.5207803651  | 0.8750421565  | -2.8853463555 | H | 1.0 | -2.9281609110 | -2.7835597830 | 0.8467359459  |
| C | 6.0 | 3.8552114574  | 2.4854132722  | -0.0923072238 | C | 6.0 | -5.1903992734 | -0.7600919083 | -0.9043961844 |
| H | 1.0 | 4.4140765676  | 3.2014382888  | -0.7329682634 | H | 1.0 | -5.8325004862 | -1.6298194978 | -1.1641002030 |
| H | 1.0 | 4.4912881369  | 2.2863476465  | 0.7904344422  | H | 1.0 | -5.1964100468 | -0.0847823704 | -1.7812738145 |
| H | 1.0 | 2.9380991793  | 3.0079050751  | 0.2411312339  | H | 1.0 | -5.6753191580 | -0.2391471290 | -0.0565216748 |
| C | 6.0 | 4.9365754351  | 0.6077292087  | -1.3230945302 | C | 6.0 | 3.7552326231  | -1.4022954631 | 0.2225836709  |
| H | 1.0 | 5.5514111927  | 1.4027293208  | -1.7985142355 | C | 6.0 | 3.5008562814  | -2.0694256098 | 1.5949216653  |
| H | 1.0 | 4.8543416635  | -0.2133877917 | -2.0595276498 | H | 1.0 | 3.8374439612  | -1.4472642078 | 2.4459472771  |
| H | 1.0 | 5.5048214974  | 0.2410515594  | -0.4462851823 | H | 1.0 | 4.0831876787  | -3.0153418407 | 1.6383680314  |
| C | 6.0 | -3.6079164950 | 1.4994429669  | -0.1029307670 | H | 1.0 | 2.4362559079  | -2.3366604460 | 1.7458448328  |
| C | 6.0 | -3.4624848505 | 2.3499903001  | 1.1818774352  | C | 6.0 | 5.2555755285  | -1.0498313936 | 0.1119408638  |
| H | 1.0 | -3.8790087460 | 1.8535458168  | 2.0793440764  | H | 1.0 | 5.8421699056  | -1.9836071064 | 0.2538662997  |
| H | 1.0 | -4.0426825856 | 3.2870431457  | 1.0398052915  | H | 1.0 | 5.5930933778  | -0.3312083602 | 0.8827386500  |
| H | 1.0 | -2.4165417727 | 2.6448428491  | 1.3894535226  | H | 1.0 | 5.5311069757  | -0.6507554841 | -0.8833478425 |
| C | 6.0 | -5.0987192417 | 1.1200430901  | -0.2627645904 | C | 6.0 | 3.4050607261  | -2.4517569576 | -0.8643586983 |
| H | 1.0 | -5.6968367165 | 2.0565645246  | -0.2162937588 | H | 1.0 | 3.6750717766  | -2.1378639513 | -1.8876283165 |
| H | 1.0 | -5.4707473968 | 0.4575151711  | 0.5413487215  | H | 1.0 | 2.3306354029  | -2.7239860048 | -0.8550595416 |
| H | 1.0 | -5.3240643655 | 0.6490895185  | -1.2385320163 | H | 1.0 | 3.9750206509  | -3.3811807314 | -0.6482732354 |
| C | 6.0 | -3.1937102772 | 2.3952428515  | -1.2984798195 | C | 6.0 | -0.0796353636 | -2.8644051735 | 0.6367502620  |
| H | 1.0 | -3.3324412342 | 1.9148453009  | -2.2819350491 | H | 1.0 | -0.9131594504 | -3.4896567585 | 0.2591232150  |
| H | 1.0 | -2.1446294314 | 2.7393970428  | -1.2280389695 | H | 1.0 | 0.8575570324  | -3.4417225954 | 0.5238882800  |
| H | 1.0 | -3.8340205480 | 3.3036176324  | -1.2836612387 | H | 1.0 | -0.2487076942 | -2.6526859677 | 1.7100495019  |
| C | 6.0 | 0.0541688524  | 2.7161601038  | 0.3573696695  | H | 1.0 | 0.0581776139  | -0.7855472325 | -2.2666957962 |
| H | 1.0 | 1.0603931173  | 3.1601393157  | 0.2288648647  |   |     |               |               |               |
| H | 1.0 | -0.6716625816 | 3.4130548554  | -0.1066231061 |   |     |               |               |               |
| H | 1.0 | -0.1542231415 | 2.6697685379  | 1.4442799195  |   |     |               |               |               |
| H | 1.0 | -0.0722578406 | 0.6804565538  | -2.0887927747 |   |     |               |               |               |

Product III:

|    | ATOM | CHARGE        | X             | Y             | Z |
|----|------|---------------|---------------|---------------|---|
| P  | 15.0 | -2.6282410575 | 0.2555687480  | 0.0499585467  |   |
| TL | 81.0 | -0.0012178206 | -1.0600516482 | -0.4040422701 |   |
| P  | 15.0 | 2.6490048905  | 0.2406413099  | 0.0525819401  |   |
| C  | 6.0  | -2.8472212955 | 1.7362450052  | -1.2001645002 |   |
| H  | 6.0  | -4.1137930162 | 2.5935173585  | -0.9821677397 |   |
| C  | 1.0  | -5.0509694156 | 2.0113280332  | -1.0617130272 |   |
| H  | 1.0  | -4.1463778082 | 3.3796838637  | -1.7681459439 |   |
| H  | 1.0  | -4.1104912942 | 3.1189158109  | -0.0070309250 |   |
| C  | 6.0  | -1.5975875525 | 2.6401105813  | -1.0727988570 |   |
| H  | 1.0  | -0.6592188810 | 2.0682055578  | -1.2176355464 |   |
| H  | 1.0  | -1.5379420067 | 3.1703643740  | -0.1058006324 |   |
| H  | 1.0  | -1.6324810459 | 3.4165519519  | -1.8680346629 |   |
| C  | 6.0  | -2.8471414036 | 1.1841922208  | -2.6455577115 |   |
| H  | 1.0  | -3.7575257707 | 0.6051458065  | -2.8905260073 |   |
| H  | 1.0  | -1.9578402062 | 0.5534442881  | -2.8522027910 |   |
| H  | 1.0  | -2.8093062640 | 2.0441279682  | -3.3484033628 |   |
| C  | 6.0  | -3.0225616718 | 0.8676421511  | 1.8599078744  |   |
| C  | 6.0  | -4.5266346018 | 1.0596549186  | 2.1563778057  |   |
| H  | 1.0  | -5.1036718319 | 0.1168260880  | 2.0947221254  |   |
| H  | 1.0  | -5.0027625062 | 1.8024446707  | 1.4881546833  |   |
| H  | 1.0  | -4.6360057624 | 1.4363020271  | 3.1969139811  |   |
| C  | 6.0  | -2.2954757381 | 2.2069452252  | 1.2469408862  |   |
| H  | 1.0  | -1.2123818427 | 2.1563919855  | 1.8896771362  |   |
| H  | 1.0  | -2.3832928457 | 2.4406467712  | 3.2077979374  |   |
| H  | 1.0  | -2.7398235826 | 3.0590178721  | 1.5752723835  |   |
| C  | 6.0  | -2.4253441111 | -0.1609987337 | 2.8513367570  |   |
| H  | 1.0  | -2.8988590546 | -1.1572455317 | 2.7968707589  |   |
| H  | 1.0  | -2.5723725660 | 0.2164127364  | 3.8864563498  |   |
| H  | 1.0  | -1.3350414368 | -0.2876472579 | 2.6971133270  |   |
| C  | 6.0  | 3.2170672516  | 1.1520554632  | -1.5824906870 |   |
| C  | 6.0  | 2.6570329191  | 1.4987618379  | 1.5402856005  |   |
| C  | 6.0  | 3.5483494028  | 0.1044420554  | -2.6725772817 |   |
| H  | 1.0  | 4.4696569759  | -0.4691610495 | -2.4592620492 |   |
| H  | 1.0  | 3.7199617978  | 0.6454625899  | -3.6283785752 |   |
| H  | 1.0  | 2.7128664323  | -0.6048004903 | -2.8462726187 |   |
| C  | 6.0  | 2.0108556919  | 1.9617360920  | -2.1141075343 |   |
| H  | 1.0  | 1.7025099866  | 2.7829555636  | -1.4434932425 |   |
| H  | 1.0  | 1.1394276100  | 1.3015631485  | -2.2968367971 |   |
| H  | 1.0  | 2.2896415913  | 2.4198030795  | -3.0880116720 |   |
| C  | 6.0  | 4.4273992987  | 2.0954201449  | -1.4036311229 |   |
| H  | 1.0  | 4.2081618845  | 2.9453177366  | -0.7286735607 |   |
| H  | 1.0  | 4.6851261791  | 2.5309591384  | -2.3939569528 |   |

Product IIIn:

|    | ATOM | CHARGE        | X             | Y             | Z |
|----|------|---------------|---------------|---------------|---|
| P  | 15.0 | -2.5432766020 | 0.1221816133  | 0.0195321854  |   |
| IN | 49.0 | 0.0023555299  | -1.0072246905 | -0.5371391410 |   |
| P  | 15.0 | 2.5552613737  | 0.1292248612  | 0.0241849055  |   |
| C  | 6.0  | -2.7828436847 | 1.6953793020  | -1.0992387068 |   |
| C  | 6.0  | -4.0612417503 | 2.5128486587  | -0.8045776268 |   |
| H  | 1.0  | -4.9839596814 | 1.9228569995  | -0.9213342318 |   |
| H  | 1.0  | -4.1113818659 | 3.3530726741  | -1.5306339685 |   |
| H  | 1.0  | -4.0579074262 | 2.9640727879  | 0.2069648042  |   |
| C  | 6.0  | -1.5456235914 | 2.6019315907  | -0.9010405145 |   |
| H  | 1.0  | -0.6027986808 | 2.0499177639  | -1.0847601766 |   |
| H  | 1.0  | -1.4937180237 | 3.0643162330  | 0.1007587922  |   |
| H  | 1.0  | -1.5861569971 | 3.4297125868  | -1.6417513240 |   |
| C  | 6.0  | -2.7824295274 | 1.2682085773  | -2.5875193649 |   |
| H  | 1.0  | -3.6951842587 | 0.7175856514  | -2.8846015445 |   |
| H  | 1.0  | -1.8944762645 | 0.6587082097  | -2.8541885998 |   |
| H  | 1.0  | -2.7476944413 | 2.1896605789  | -3.2080726026 |   |
| C  | 6.0  | -2.9143689643 | 0.5658103209  | 1.8809173778  |   |
| C  | 6.0  | -4.4197495008 | 0.7032062461  | 2.2042937236  |   |
| H  | 1.0  | -4.9802483346 | -0.2440714478 | 2.0869407251  |   |
| H  | 1.0  | -4.9202771481 | 1.4819341834  | 1.5976399973  |   |
| H  | 1.0  | -4.5207097084 | 1.0049543954  | 3.2697113720  |   |
| C  | 6.0  | -2.2176760481 | 1.8952787213  | 2.2504719881  |   |
| H  | 1.0  | -1.1343183019 | 1.8926209857  | 2.0137159503  |   |
| H  | 1.0  | -2.3118706369 | 2.0430095210  | 3.3481771636  |   |
| H  | 1.0  | -2.6833669505 | 2.7750629337  | 1.7667364236  |   |
| C  | 6.0  | -2.2885261632 | -0.5342551075 | 2.7720542303  |   |
| H  | 1.0  | -2.7293892140 | -1.5348468121 | 2.6187415064  |   |
| H  | 1.0  | -2.4494806230 | -0.2605072144 | 3.8372818237  |   |
| H  | 1.0  | -1.1938309590 | -0.6116894664 | 2.6147469128  |   |
| C  | 6.0  | 3.1524253780  | 1.2006442364  | -1.4960073933 |   |
| C  | 6.0  | 2.5943611749  | 1.2029082281  | 1.645354      |   |

|   |     |               |               |               |   |     |               |               |                |
|---|-----|---------------|---------------|---------------|---|-----|---------------|---------------|----------------|
| H | 1.0 | 5.3307456511  | 1.5769324722  | -1.0299928278 | H | 1.0 | 2.2054709584  | -1.3125151419 | 6.1962838287   |
| C | 6.0 | 1.9488246682  | 2.8025090281  | 1.1068788017  | C | 6.0 | 3.6412903275  | 0.6785806606  | 2.9916442237   |
| H | 1.0 | 1.8022816954  | 3.4409219355  | 2.0053912286  | H | 1.0 | 4.4460693827  | 1.4434237565  | 2.9424947132   |
| H | 1.0 | 0.9450549171  | 2.6145350327  | 0.6728107317  | H | 1.0 | 3.3358936723  | 0.4635602002  | 1.9485485646   |
| H | 1.0 | 2.5409851475  | 3.3953461029  | 0.3838966257  | H | 1.0 | 4.0875106327  | -0.2346898818 | 3.4300581385   |
| C | 6.0 | 4.0621253641  | 1.8518064221  | 2.0789684061  | C | 6.0 | 2.9994942241  | 1.5271350841  | 5.2588988666   |
| H | 1.0 | 3.9525443818  | 2.5892465081  | 2.9042526492  | H | 1.0 | 3.8634329381  | 2.2234825031  | 5.1767787992   |
| H | 1.0 | 4.7105834377  | 2.3140098277  | 1.3104662952  | H | 1.0 | 3.3682929532  | 0.6254273243  | 5.7815977496   |
| H | 1.0 | 4.5918758961  | 0.9763224688  | 2.5016076946  | H | 1.0 | 2.2541383770  | 2.0305798973  | 5.9031198656   |
| C | 6.0 | 1.8082757344  | 0.8879292838  | 2.6824409382  | C | 6.0 | 2.0320349034  | 2.5730185914  | 3.1901207589   |
| H | 1.0 | 1.7524814650  | 1.6231189860  | 3.5142692089  | H | 1.0 | 2.9191782539  | 3.2291241802  | 3.0545296722   |
| H | 1.0 | 2.2334942091  | -0.0435676105 | 3.0961958224  | H | 1.0 | 1.3051861984  | 3.1303635169  | 3.8104237182   |
| H | 1.0 | 0.7684459424  | 0.6817456326  | 2.3534757142  | H | 1.0 | 1.5829670648  | 2.4077398304  | 2.1896251068   |
| C | 6.0 | -3.8792461172 | -1.1759548590 | -0.4301832212 | C | 6.0 | -1.8726688346 | -0.2736652140 | -0.6845691850  |
| C | 6.0 | -3.2763149400 | -1.9784849312 | -1.6125963592 | C | 6.0 | -2.6429455659 | -1.1623730623 | 0.3176868742   |
| H | 1.0 | -4.0055739543 | -2.7630470699 | -1.9103810507 | H | 1.0 | -3.7137707579 | -1.1810381186 | 0.0203183770   |
| H | 1.0 | -2.3429223647 | -2.5133292557 | -1.3332180609 | H | 1.0 | -2.5610279112 | -0.8052371996 | 1.3604288817   |
| H | 1.0 | -3.0663897676 | -1.3688470876 | -2.5093520307 | H | 1.0 | -2.2831424354 | -2.2083093625 | 0.3097601353   |
| C | 6.0 | -4.0300813982 | -2.1737173981 | 0.7416175000  | C | 6.0 | -2.6174552021 | 0.0730057765  | -0.8680337778  |
| H | 1.0 | -4.6047490141 | -3.0526815524 | 0.3770756852  | H | 1.0 | -3.6846205087 | 0.8450861949  | -1.0784083247  |
| H | 1.0 | -4.5906169063 | -1.7622501762 | 1.6026796508  | H | 1.0 | -2.2426801378 | 1.6495740300  | -0.17350428256 |
| H | 1.0 | -3.0542686719 | -2.5530835965 | 1.1050610845  | H | 1.0 | -2.5956519783 | 1.1789862343  | 0.0153636354   |
| C | 6.0 | -5.2864311969 | -0.6709440991 | -0.8227162544 | C | 6.0 | -1.9248683881 | -0.9711116959 | -2.0654168586  |
| H | 1.0 | -5.9396144164 | -1.5508264994 | -1.0137965589 | H | 1.0 | -2.9889221316 | -0.9837034516 | -2.3866944581  |
| H | 1.0 | -5.2846951850 | -0.0687010866 | -1.7514258420 | H | 1.0 | -1.5995641535 | -2.0278025120 | -2.0362390311  |
| H | 1.0 | -5.7672167449 | -0.0769474119 | -0.0219208533 | H | 1.0 | -1.3587796798 | -0.4409422325 | -2.8536089362  |
| C | 6.0 | 3.8979250083  | -1.2166348385 | 0.4277904203  | C | 6.0 | -0.3183058156 | 0.4095214882  | 5.1994710522   |
| C | 6.0 | 3.7112963297  | -1.7170813125 | 1.8788097679  | C | 6.0 | -0.5309649372 | 1.9413584678  | 5.2983687441   |
| H | 1.0 | 4.0711568886  | -0.9968439450 | 2.6385740427  | H | 1.0 | 0.3750420627  | 2.4603795238  | 5.6637661146   |
| H | 1.0 | 4.3104535303  | -2.6446542419 | 2.0073684868  | H | 1.0 | -1.3296969068 | 2.1286104062  | 6.0476244714   |
| H | 1.0 | 2.6585705137  | -1.9785840346 | 2.1050356212  | H | 1.0 | -0.8432497665 | 2.4279502087  | 4.3623086960   |
| C | 6.0 | 5.3832630958  | -0.8397051042 | 0.2253857282  | C | 6.0 | 0.2246455312  | -0.0057829285 | 6.5902800291   |
| H | 1.0 | 6.0125310943  | -1.7077100184 | 0.5209981762  | H | 1.0 | -0.5136120815 | 0.3609143074  | 7.3366117432   |
| H | 1.0 | 5.6961337856  | 0.0179016855  | 0.8508954974  | H | 1.0 | 1.1949887326  | 0.4540767706  | 6.8523506126   |
| H | 1.0 | 5.6277054301  | -0.6107262529 | -0.8294924724 | H | 1.0 | 0.2924140146  | -1.0989696455 | 6.7352790786   |
| C | 6.0 | 3.5425467484  | -2.4072136236 | -0.5003248221 | C | 6.0 | -1.6673125866 | -0.3400951349 | 4.9847774859   |
| H | 1.0 | 3.6316129342  | -2.1773272053 | -1.5766680978 | H | 1.0 | -1.7358842892 | -1.2365644109 | 5.6295321034   |
| H | 1.0 | 2.5194935972  | -2.7953621225 | -0.3137007386 | H | 1.0 | -1.8140228197 | -0.6766685440 | 3.9389069679   |
| H | 1.0 | 4.2438062002  | -3.2421532975 | -0.2836285246 | H | 1.0 | -2.5167582206 | 0.3162428121  | 5.2675443815   |
| C | 6.0 | -0.0324970515 | -2.5154784168 | 1.2738262760  | C | 6.0 | -1.7064123519 | 2.8554199442  | 2.1153865021   |
| H | 1.0 | -1.0570507139 | -2.9175590283 | 1.3747078206  | H | 6.0 | -2.1878565032 | 1.6274040036  | 2.4397811022   |
| H | 1.0 | 0.6738493649  | -3.3323218829 | 1.0339861305  | H | 1.0 | -1.9663878300 | 3.3508564059  | 1.1678965709   |
| H | 1.0 | 0.2695158229  | -2.0007211626 | 2.2032482792  | H | 1.0 | -1.0764807908 | 3.4483685195  | 2.7990766325   |
| H | 1.0 | 0.0448124463  | -0.8219689398 | -2.1237275153 | H | 1.0 | -2.9064524339 | 1.1063404830  | 1.7937507131   |
| H |     |               |               |               | H | 1.0 | -2.0694931541 | 1.2048348195  | 3.4388253954   |

## Transition states of the reactions with ethene

### Transition state TS2B:

| ATOM | CHARGE | X             | Y             | Z             |
|------|--------|---------------|---------------|---------------|
| P    | 15.0   | -0.0054163221 | 0.0051974241  | 0.0009799846  |
| B    | 5.0    | -0.0353314805 | -0.0261618043 | 1.9678927971  |
| P    | 15.0   | 0.9329257323  | -0.0117907719 | 3.6752985624  |
| C    | 6.0    | 1.0371332137  | -1.5803034423 | -0.5621253719 |
| C    | 6.0    | 1.2251853655  | -1.7484449816 | -2.0897112998 |
| H    | 1.0    | 0.2933784142  | -1.8593806763 | -2.6671698859 |
| H    | 1.0    | 1.8050979250  | -2.6877212281 | -2.2301841032 |
| H    | 1.0    | 1.8337558637  | -0.9403184104 | -2.5366308272 |
| C    | 6.0    | 2.4722365404  | -1.4844810262 | 0.0112346241  |
| H    | 1.0    | 2.5170977228  | -1.0197992329 | 1.0076103367  |
| H    | 1.0    | 3.1384915199  | -0.9089520491 | -0.6548912984 |
| H    | 1.0    | 2.9013749670  | -2.5056678828 | 0.0878293137  |
| C    | 6.0    | 0.3045381536  | -2.8405669472 | -0.0352973119 |
| H    | 1.0    | -0.6120328794 | -3.0495978281 | -0.6186431484 |
| H    | 1.0    | 0.0095526686  | -2.7638633894 | 1.0291505411  |
| H    | 1.0    | 0.9731852685  | -3.7197842944 | -0.1556027260 |
| C    | 6.0    | 0.7590372572  | 1.5697043238  | -1.0111075997 |
| C    | 6.0    | 0.4502470237  | 1.5407572215  | -2.5245729967 |
| H    | 1.0    | -0.6234908407 | 1.6828538665  | -2.7493923031 |
| H    | 1.0    | 0.7951531082  | 0.6237931585  | -3.0344289568 |
| H    | 1.0    | 0.9870979021  | 2.3934106388  | -2.9958739251 |
| C    | 6.0    | 2.2886462363  | 1.5844056299  | -0.8092009436 |
| H    | 1.0    | 2.5738712108  | 1.4616267855  | 0.2546102083  |
| H    | 1.0    | 2.6770766988  | 2.5708824948  | -1.1419864627 |
| H    | 1.0    | 2.8118339480  | 0.8173999330  | -1.4095672124 |
| C    | 6.0    | 0.2139425906  | 2.8873768089  | -0.4365137495 |
| H    | 1.0    | -0.8654657537 | 3.0260082081  | -0.6232194173 |
| H    | 1.0    | 0.7422411298  | 3.7277423212  | -0.9365299337 |
| H    | 1.0    | 0.4007843769  | 2.9813159671  | 0.6507864504  |
| C    | 6.0    | 1.5589614501  | -1.8598190811 | 4.1101632108  |
| C    | 6.0    | 2.4787648009  | 1.2442151259  | 3.8329971054  |
| C    | 6.0    | 0.3321835770  | -2.7395950358 | 4.4444593571  |
| H    | 1.0    | -0.1486318252 | -2.4823993097 | 5.4040321183  |
| H    | 1.0    | 0.6806809197  | -3.7912024002 | 4.5324633959  |
| C    | 6.0    | -0.4360100346 | -2.7021289281 | 3.6467282628  |
| H    | 1.0    | 2.2969722747  | -2.5636628852 | 2.9601121640  |
| H    | 1.0    | 3.2010800458  | -2.0295595033 | 2.6188070680  |
| H    | 1.0    | 1.6405288933  | -2.7617105061 | 2.0988497377  |
| H    | 1.0    | 2.6315401095  | -3.5518035710 | 3.3433037882  |
| C    | 6.0    | 2.5539087764  | -1.8427874400 | 5.2964243034  |
| H    | 1.0    | 3.5408281154  | -1.4345318152 | 5.0056849360  |
| H    | 1.0    | 2.7238172284  | -2.9015524333 | 5.5902690751  |

### Transition state TS2A1:

| ATOM | CHARGE | X             | Y             | Z             |
|------|--------|---------------|---------------|---------------|
| P    | 15.0   | 0.0020923274  | 0.0014604179  | -0.0064799610 |
| AL   | 13.0   | -0.0073438551 | -0.0620280593 | 2.6357903016  |
| P    | 15.0   | 2.1409420052  | 0.0046123842  | 4.3601143513  |
| C    | 6.0    | 1.1637213141  | -1.1947862269 | -1.0557685037 |
| C    | 6.0    | 1.4175307432  | -0.7291770782 | -2.5076120708 |
| H    | 1.0    | 0.4902248855  | -0.6617745150 | -3.1073063186 |
| H    | 1.0    | 2.0688141163  | -1.4829699656 | -3.0017748333 |
| H    | 1.0    | 1.9488031998  | 0.2387759215  | -2.5701708400 |
| C    | 6.0    | 2.5073178059  | -1.3010234548 | -0.2993265602 |
| H    | 1.0    | 2.3527838288  | -1.6196080209 | 0.7523099600  |
| H    | 1.0    | 3.0885947435  | -0.3604242269 | -0.3036896729 |
| H    | 1.0    | 3.1363527279  | -2.0743044789 | -0.7912810625 |
| C    | 6.0    | 0.5637031357  | -2.6178667676 | -1.1093531990 |
| H    | 1.0    | -0.3669434347 | -2.6786903482 | -1.7051036234 |
| H    | 1.0    | 0.3777630515  | -3.0358433143 | -0.1017504183 |
| H    | 1.0    | 1.3047284719  | -3.2823293741 | -1.6037723220 |
| C    | 6.0    | 0.4812289839  | 1.8556129875  | -0.4448573856 |
| C    | 6.0    | -0.0247235664 | 2.3300479879  | -1.8278962635 |
| H    | 1.0    | -1.1277869210 | 2.4034727336  | -1.8763902793 |
| H    | 1.0    | 0.3233402079  | 1.6970210858  | -2.6649096350 |
| H    | 1.0    | 0.3690318847  | 3.3542900059  | -2.0077761043 |
| C    | 6.0    | 2.0200896047  | 2.0154800054  | -0.4160542245 |
| H    | 1.0    | 2.4780929680  | 1.6388340267  | 0.5179851080  |
| H    | 1.0    | 2.2554351888  | 3.0996361073  | -0.4789786551 |
| H    | 1.0    | 2.5231051607  | 1.5265695778  | -1.2710333656 |
| C    | 6.0    | -0.1080525198 | 2.7987191536  | 0.6312300532  |
| H    | 1.0    | -1.2117451571 | 2.8115977000  | 0.6452578396  |
| H    | 1.0    | 0.2363176529  | 3.8342306027  | 0.4191382463  |
| H    | 1.0    | 0.2258426117  | 2.5363664522  | 1.6563559322  |
| C    | 6.0    | 3.0400865093  | -1.6946232412 | 4.7976690120  |
| C    | 6.0    | 3.4992078648  | 1.2947022924  | 3.7970125398  |
| C    | 6.0    | 2.0524875932  | -2.5900902825 | 5.5844107202  |
| H    | 1.0    | 1.8540792205  | -2.2172532994 | 6.6074706609  |
| H    | 1.0    | 2.505959632   | -3.5989622573 | 5.6924339683  |
| H    | 1.0    | 1.0820111287  | -2.7252547601 | 5.0668472574  |
| C    | 6.0    | 3.3862699788  | -2.4231266113 | 3.4770641888  |
| H    | 1.0    | 4.2391750805  | -1.9682965220 | 2.9418579023  |
| H    | 1.0    | 2.5274395240  | -2.4599819019 | 2.7786005852  |
| H    | 1.0    | 3.6722200277  | -3.4713301865 | 3.7119313128  |
| C    | 6.0    | 4.3394640607  | -1.5519693542 | 5.6215340367  |
| H    | 1.0    | 5.1391746438  | -1.0205783679 | 5.0699182076  |
| H    | 1.0    | 4.7244962960  | -2.5738408538 | 5.8323081844  |
| H    | 1.0    | 4.1941314477  | -1.0521599155 | 6.5970910229  |
| C    | 6.0    | 4.3760904814  | 0.6299919225  | 2.7096803160  |
| H    | 1.0    | 5.0215131315  | 1.4109636079  | 2.2530216215  |



|   |     |               |               |               |   |     |               |               |               |
|---|-----|---------------|---------------|---------------|---|-----|---------------|---------------|---------------|
| H | 1.0 | 3.7747798150  | 0.1749301068  | 1.8964989095  | H | 1.0 | -3.7962275519 | 3.7068747552  | 0.1752061249  |
| H | 1.0 | 5.0518022409  | -0.1442210304 | 3.1197652970  | H | 1.0 | -4.5832612573 | 2.2268358743  | 0.7841094997  |
| C | 6.0 | 4.4217182129  | 1.8175777120  | 4.9213511709  | H | 1.0 | -4.3228666295 | 2.4596924050  | -0.9789233003 |
| H | 1.0 | 5.1801537625  | 2.4869925104  | 4.4590476611  | C | 6.0 | -1.5927651289 | 2.6390461846  | -0.9818152448 |
| H | 1.0 | 4.9705588179  | 1.0153812446  | 5.4474893765  | H | 1.0 | -1.3871415498 | 3.6987694775  | -0.7182796864 |
| H | 1.0 | 3.8813528400  | 2.4249535485  | 5.6728084496  | H | 1.0 | -2.0950257814 | 2.6429908493  | -1.9644122624 |
| C | 6.0 | 2.7943228306  | 2.5075466743  | 3.1470665918  | H | 1.0 | -0.6198532347 | 2.1304463780  | -1.1057384442 |
| H | 1.0 | 3.5509189219  | 3.1128613769  | 2.6027475438  | C | 6.0 | 3.6613433385  | -1.1767905582 | -0.7708914862 |
| H | 1.0 | 2.3060994533  | 3.1757676811  | 3.8772662553  | C | 6.0 | 3.3916037978  | -2.6367723540 | -0.3379717465 |
| H | 1.0 | 2.0275161025  | 2.1948066314  | 2.4139187620  | H | 1.0 | 4.1988982312  | -3.2680647471 | -0.7680854453 |
| C | 6.0 | -1.8671438100 | -0.2641507240 | -0.5519409592 | H | 1.0 | 2.4391270214  | -3.0199302162 | -0.7402606461 |
| C | 6.0 | -2.4166335575 | -1.5610872027 | 0.0853034696  | H | 1.0 | 3.4085977263  | -2.7944920590 | 0.7544198467  |
| H | 1.0 | -3.4652597175 | -1.6973654274 | -0.2564779999 | C | 6.0 | 3.5358749573  | -1.1374102420 | -2.3129670780 |
| H | 1.0 | -2.4456690473 | -1.4926840148 | 1.1877429708  | H | 1.0 | 4.1482413084  | -1.9670360322 | -2.7274862152 |
| H | 1.0 | -1.8593836528 | -2.4699555923 | -0.2034819549 | H | 1.0 | 3.9265860673  | -0.2017877174 | -2.7555260767 |
| C | 6.0 | -2.7478642406 | 0.8935337172  | -0.0224299139 | H | 1.0 | 2.4931368432  | -1.2880937901 | -2.6616481989 |
| H | 1.0 | -3.8109639397 | 0.6257056917  | -0.2059476676 | C | 6.0 | 5.1142898451  | -0.8299393671 | -0.3641800831 |
| H | 1.0 | -2.5672613324 | 1.8533265405  | -0.5424473441 | H | 1.0 | 5.7935998372  | -1.4926793534 | -0.9432824635 |
| H | 1.0 | -2.6332631168 | 1.0533196180  | 1.0703604668  | H | 1.0 | 5.3153687032  | -1.0293263604 | 0.7064254207  |
| C | 6.0 | -2.0399122285 | -0.3730299555 | -2.0856282821 | H | 1.0 | 5.4043561326  | 0.2108817621  | -0.5899971659 |
| H | 1.0 | -3.1269852842 | -0.4705508650 | -2.2976457351 | C | 6.0 | -3.4444866323 | -0.4733575385 | -1.5512604159 |
| H | 1.0 | -1.5532115996 | -1.2740369194 | -2.5058497100 | C | 6.0 | -3.0897549428 | 0.4232879620  | -2.7598981763 |
| H | 1.0 | -1.6790870111 | 0.5120075389  | -2.6397977977 | H | 1.0 | -3.4887341057 | 1.4512214536  | -2.6718266546 |
| C | 6.0 | 1.29777050431 | 0.7106966233  | 5.9932462875  | H | 1.0 | -3.5536735888 | -0.0252941839 | -3.6646516281 |
| C | 6.0 | 0.9434318321  | 2.2021758613  | 5.7886245105  | H | 1.0 | -1.9960381916 | 0.4691823919  | -2.9418081009 |
| H | 1.0 | 1.8327559086  | 2.8585443895  | 5.7642751319  | C | 6.0 | -4.9653955318 | -0.3797606539 | -1.2831126265 |
| H | 1.0 | 0.3229781605  | 2.5290188653  | 6.6508220559  | H | 1.0 | -5.4928792670 | -0.5859664876 | -2.2398022058 |
| H | 1.0 | 0.3395589854  | 2.3688495295  | 4.8716272900  | H | 1.0 | -5.2934338797 | 0.6180114968  | -0.9389543772 |
| C | 6.0 | 2.1854980823  | 0.5758423408  | 7.2510542556  | H | 1.0 | -5.3210862366 | -1.1352886553 | -0.5564937647 |
| H | 1.0 | 1.6664469610  | 1.0787604738  | 8.0961132787  | C | 6.0 | -3.1066047500 | -1.9194297977 | -1.9832268342 |
| H | 1.0 | 3.1731639555  | 1.0604616350  | 7.1408950663  | H | 1.0 | -3.2256158070 | -2.6677097895 | -1.1787129740 |
| H | 1.0 | 2.3429128950  | -0.4766623411 | 7.5557440412  | H | 1.0 | -2.0814846288 | -1.9852689900 | -2.3969908039 |
| C | 6.0 | -0.0449261030 | -0.0146573353 | 6.2469247294  | H | 1.0 | -3.8077440990 | -2.2025764328 | -2.7975754075 |
| H | 1.0 | 0.0582303299  | -1.1068408746 | 6.3840003267  | C | 6.0 | 0.1589023218  | -2.6651467733 | 0.7153433550  |
| H | 1.0 | -0.7716047894 | 0.1881640826  | 5.4328320094  | H | 1.0 | 1.1468861065  | -2.9053974015 | 1.1333049080  |
| H | 1.0 | -0.4873757804 | 0.3892420760  | 7.1831287033  | C | 1.0 | -0.6751030433 | -2.8662774383 | 1.4037509834  |
| C | 6.0 | -0.2318339930 | -2.5397624505 | 2.5416258932  | H | 6.0 | -0.0581225154 | -2.8436921223 | -0.7175651184 |
| C | 6.0 | -1.0680920666 | -1.7330884852 | 3.3569588344  | H | 1.0 | -1.0654762562 | -3.1232180542 | -1.0612750034 |
| H | 1.0 | -0.5928505180 | -2.9271325218 | 1.5806855698  | H | 1.0 | 0.7319699466  | -3.2567843455 | -1.3676404860 |
| H | 1.0 | 0.6743083806  | -3.0087300183 | 2.9494237056  |   |     |               |               |               |
| H | 1.0 | -0.8573558550 | -1.6757607283 | 4.4384186483  |   |     |               |               |               |
| H | 1.0 | -2.1398496367 | -1.6181603751 | 3.1187218376  |   |     |               |               |               |

### Transition state TS2In:

|    | ATOM | CHARGE        | X             | Y             | Z |
|----|------|---------------|---------------|---------------|---|
| P  | 15.0 | 2.5105193862  | 0.2006802246  | -0.0753643739 |   |
| IN | 49.0 | 0.0189861314  | -0.8362518856 | -0.1321644526 |   |
| P  | 15.0 | -2.4966883800 | 0.1460402781  | 0.0398953731  |   |
| C  | 6.0  | 3.0286762949  | 0.4520790799  | 1.7932450935  |   |
| C  | 6.0  | 4.3061389685  | 1.3021721933  | 1.9817838829  |   |
| H  | 1.0  | 5.1908794842  | 0.8683500836  | 1.4787952158  |   |
| H  | 1.0  | 4.5370505040  | 1.3410660939  | 3.0685959633  |   |
| H  | 1.0  | 4.1892310352  | 2.3494194412  | 1.6437434581  |   |
| C  | 6.0  | 1.8368936884  | 1.1108753024  | 2.5262311907  |   |
| H  | 1.0  | 0.9229168020  | 0.4873479285  | 2.4174856748  |   |
| H  | 1.0  | 1.6112246236  | 2.1374835695  | 2.1849231805  |   |
| H  | 1.0  | 2.0743925754  | 1.1671252605  | 3.6102824387  |   |
| C  | 6.0  | 3.2393988890  | -0.9299901162 | 2.4531598346  |   |
| H  | 1.0  | 4.1562932306  | -1.4457680481 | 2.1077968692  |   |
| H  | 1.0  | 2.3640434721  | -1.5935513985 | 2.3028695263  |   |
| H  | 1.0  | 3.3520969459  | -0.7735462226 | 3.5474497298  |   |
| C  | 6.0  | 2.6466489581  | 1.9006763176  | -1.0338652665 |   |
| C  | 6.0  | 4.0915888138  | 2.2516300211  | -1.4628984499 |   |
| H  | 1.0  | 4.5057070466  | 1.5563715818  | -2.2168232507 |   |
| H  | 1.0  | 4.7929137066  | 2.3077509749  | -0.6080409147 |   |
| H  | 1.0  | 4.0720572823  | 3.2578598378  | -1.9347903480 |   |
| C  | 6.0  | 2.1373864555  | 3.0656048628  | -0.1538175970 |   |
| H  | 1.0  | 1.1241126995  | 2.8991070361  | 0.2528415475  |   |
| H  | 1.0  | 2.0878641441  | 3.9765568594  | -0.7885264357 |   |
| H  | 1.0  | 2.8165821493  | 3.2973070670  | 0.6878120346  |   |
| C  | 6.0  | 1.7483680495  | 1.8194779252  | -2.2922117887 |   |
| H  | 1.0  | 2.0891872593  | 1.0651951135  | -3.0238181201 |   |
| H  | 1.0  | 1.7601998343  | 2.8068282196  | -2.8029178535 |   |
| H  | 1.0  | 0.6940471685  | 1.5864714760  | -2.0389918079 |   |
| C  | 6.0  | -3.4649688429 | -0.8710832018 | 1.4081374919  |   |
| C  | 6.0  | -2.5601327825 | 2.0466678861  | 0.4803706215  |   |
| C  | 6.0  | -3.7245647099 | -2.3075518741 | 0.8967108676  |   |
| H  | 1.0  | -4.4689951615 | -2.3470776192 | 0.0781577835  |   |
| H  | 1.0  | -4.1419898357 | -2.8990393522 | 1.7396141742  |   |
| C  | 1.0  | -2.8034332929 | -2.8266168727 | 0.5662498416  |   |
| C  | 6.0  | -2.5874720986 | -0.9732144168 | 2.6789940892  |   |
| H  | 1.0  | -2.4724180517 | -0.0086418526 | 3.2040388793  |   |
| H  | 1.0  | -1.5781870857 | -1.3745403564 | 2.4597164039  |   |
| H  | 1.0  | -3.0870056148 | -1.6702065845 | 3.3860603936  |   |
| C  | 6.0  | -4.8184147609 | -0.2283760189 | 1.7864062472  |   |
| H  | 1.0  | -4.7007198697 | 0.7577010079  | 2.2760255013  |   |
| H  | 1.0  | -5.3193602454 | -0.8920387689 | 2.5245515115  |   |
| H  | 1.0  | -5.5094632646 | -0.1154851814 | 0.9296838139  |   |
| C  | 6.0  | -2.1762468282 | 2.2322091704  | 1.9671752141  |   |
| H  | 1.0  | -2.0569962085 | 3.3201393722  | 2.1606850199  |   |
| H  | 1.0  | -1.2151463052 | 1.7431467628  | 2.2279043479  |   |
| C  | 6.0  | -2.9551708187 | 1.8673050441  | 2.6628102702  |   |
| H  | 1.0  | -3.9292650512 | 2.7177073715  | 0.2255839510  |   |
| H  | 1.0  | -3.8579924479 | 3.7799083346  | 0.5468141370  |   |
| H  | 1.0  | -4.7567803923 | 2.2586123075  | 0.7971454015  |   |
| H  | 1.0  | -4.2031916901 | 2.7275697159  | -0.8469167082 |   |

### Transition state TS2Ga:

|    | ATOM | CHARGE        | X             | Y             | Z |
|----|------|---------------|---------------|---------------|---|
| P  | 15.0 | 2.3651518092  | 0.0744367525  | 0.0180131398  |   |
| GA | 31.0 | 0.0348153507  | -0.8007464943 | -0.5346472301 |   |
| P  | 15.0 | -2.3673814855 | 0.0601378279  | 0.0074847587  |   |
| C  | 6.0  | 2.7981213149  | 0.3436871471  | 1.9156335412  |   |
| C  | 6.0  | 4.0211809391  | 1.2552799644  | 2.1633725583  |   |
| H  | 1.0  | 4.9476226633  | 0.8743317705  | 1.6949757008  |   |
| H  | 1.0  | 4.2032028071  | 1.2936388139  | 3.2596639246  |   |
| H  | 1.0  | 3.8632719748  | 2.2995925128  | 1.8329732379  |   |
| C  | 6.0  | 1.5518051184  | 0.9433061891  | 2.6019185554  |   |
| H  | 1.0  | 0.6605998613  | 0.3032844162  | 2.4382438053  |   |
| H  | 1.0  | 1.3214061249  | 1.9727818969  | 2.2727114560  |   |
| H  | 1.0  | 1.7344747735  | 0.9837964023  | 3.6974811264  |   |
| C  | 6.0  | 3.0562643396  | -1.0254541766 | 2.5852363043  |   |
| H  | 1.0  | 4.0017399946  | -1.5021438903 | 2.2624229353  |   |
| H  | 1.0  | 2.2183297585  | -1.7295930069 | 2.4185386722  |   |
| H  | 1.0  | 3.1385558869  | -0.8606249627 | 3.6810689385  |   |
| C  | 6.0  | 2.5461836950  | 1.7854842584  | -0.9325740577 |   |
| C  | 6.0  | 4.0026854433  | 2.2312433465  | -1.2027484000 |   |
| H  | 1.0  | 4.5382385822  | 1.5654588898  | -1.9057948777 |   |
| H  | 1.0  | 4.6049194464  | 2.3363318141  | -0.2805920111 |   |
| H  | 1.0  | 3.9651572103  | 3.2331576562  | -1.6831296842 |   |
| C  | 6.0  | 1.8715681829  | 2.8945249534  | -0.0908636204 |   |
| H  | 1.0  | 0.8419070514  | 2.6416811429  | 0.2213405108  |   |
| H  | 1.0  | 1.8097681596  | 3.8143019126  | -0.7112528426 |   |
| H  | 1.0  | 2.4568130886  | 3.1534062523  | 0.8113214382  |   |
| C  | 6.0  | 1.8106872325  | 1.6797327215  | -2.2912615697 |   |
| H  | 1.0  | 2.3709423939  | 1.0885068622  | -3.0378747077 |   |
| H  | 1.0  | 1.6757311672  | 2.7001846327  | -2.7094601235 |   |
| H  | 1.0  | 0.8093060820  | 1.2099794612  | -2.1937128981 |   |
| C  | 6.0  | -3.1569501472 | -0.7275523415 | 1.6321235669  |   |
| C  | 6.0  | -2.4569085110 | 2.0102596216  | 0.1369656783  |   |
| C  | 6.0  | -3.4834878238 | -2.2166911850 | 1.3664959432  |   |
| H  | 1.0  | -4.3350541133 | -2.3586718641 | 0.6741696466  |   |
| H  | 1.0  | -3.7743332903 | -2.6827496511 | 2.3327039186  |   |
| H  | 1.0  | -2.6174723780 | -2.7892760631 | 0.9815683072  |   |
| C  | 6.0  | -2.1056267714 | -0.6693888717 | 2.7648144299  |   |
| H  | 1.0  | -1.9143694953 | 0.3579464759  | 3.1244591117  |   |
| H  | 1.0  | -1.1425852091 | -1.1180201561 | 2.4516997057  |   |
| H  | 1.0  | -2.4887574125 | -1.2518569197 | 3.6304084811  |   |
| C  | 6.0  | -4.44         |               |               |   |

|   |     |               |               |               |   |     |               |               |               |
|---|-----|---------------|---------------|---------------|---|-----|---------------|---------------|---------------|
| C | 6.0 | -1.4924584980 | 2.7730597313  | -0.3652388087 | H | 1.0 | -0.4207106421 | 2.1208121688  | 0.7450386912  |
| H | 1.0 | -1.3156362857 | 3.7824924265  | 0.0639616173  | C | 6.0 | 3.6704000467  | -0.9011056179 | -1.0169194454 |
| H | 1.0 | -1.7848268985 | 2.9117105477  | -1.4208163726 | C | 6.0 | 3.3248580793  | -2.3502009477 | -0.6129452808 |
| H | 1.0 | -0.5299517430 | 2.2278957756  | -0.3492229761 | H | 1.0 | 3.9580123991  | -3.0330261988 | -1.2192082382 |
| C | 6.0 | 3.6814343589  | -1.1045756057 | -0.9435532441 | H | 1.0 | 2.2730062006  | -2.5921118013 | -0.8411626664 |
| C | 6.0 | 3.3249972301  | -2.5323812478 | -0.4739216427 | H | 1.0 | 3.5229085450  | -2.5750970616 | -0.4490426375 |
| H | 1.0 | 3.9963118808  | -3.2404825471 | -1.0058136914 | C | 6.0 | 3.3790636668  | -0.7803535818 | -2.5324299723 |
| H | 1.0 | 2.2896427142  | -2.8058896267 | -0.7433210613 | H | 1.0 | 3.9442509505  | -1.5837199577 | -3.0519884293 |
| H | 1.0 | 3.4705029047  | -2.6976115590 | 0.6079465723  | H | 1.0 | 3.7085595243  | 0.1791817237  | -2.9730880203 |
| C | 6.0 | 3.4428092115  | -1.0702433393 | -2.4715190133 | H | 1.0 | 2.3045065847  | -0.9317302238 | -2.7667190004 |
| H | 1.0 | 4.0133534767  | -1.9089894119 | -2.9253269291 | C | 6.0 | 5.1737694043  | -0.6646446986 | -0.7405644433 |
| H | 1.0 | 3.8000461032  | -0.1408663068 | -2.9534046607 | H | 1.0 | 5.7521956566  | -1.3703237584 | -1.3758855246 |
| H | 1.0 | 2.3742096789  | -1.2241425581 | -2.7294919823 | H | 1.0 | 5.4424147215  | -0.8880177602 | 0.3099303084  |
| C | 6.0 | 5.1744733627  | -0.8474794500 | -0.6325448520 | H | 1.0 | 5.5192162681  | 0.3552550988  | -0.9873109698 |
| H | 1.0 | 5.7753725530  | -1.5813554132 | -1.2123669017 | C | 6.0 | -3.2194822173 | 0.4712201558  | -1.7054210308 |
| H | 1.0 | 5.4114098457  | -1.0136453498 | 0.4361285430  | C | 6.0 | -2.5735540102 | 1.7316109661  | -2.3242129815 |
| H | 1.0 | 5.5228943911  | 0.1603079774  | -0.9212266364 | H | 1.0 | -2.9103149119 | 2.6771059766  | -1.8572624549 |
| C | 6.0 | -3.3267363686 | -0.1338751901 | -1.7196795564 | H | 1.0 | -2.8685127103 | 1.7769471397  | -3.3945812600 |
| C | 6.0 | -2.7712339792 | 0.9121318600  | -2.7122901261 | H | 1.0 | -1.4658191678 | 1.6857654654  | -2.2950412249 |
| H | 1.0 | -3.1443925511 | 1.9366963816  | -2.5214577071 | C | 6.0 | -4.7582554181 | 0.6114896143  | -1.7606758302 |
| H | 1.0 | -3.1104934902 | 0.6313355656  | -3.7321865376 | H | 1.0 | -5.0460764583 | 0.8328947991  | -2.8113349739 |
| H | 1.0 | -1.6613518154 | 0.9269582196  | -2.7332001371 | H | 1.0 | -5.1461374806 | 1.4377106393  | -1.1350848503 |
| C | 6.0 | -4.8691674765 | -0.0298072879 | -1.6797918401 | H | 1.0 | -5.2813375717 | -0.3219103344 | -1.4765950449 |
| H | 1.0 | -5.2478703690 | -0.1074787342 | -2.7221975424 | C | 6.0 | -2.7809418061 | -0.7233841837 | -2.5854689622 |
| H | 1.0 | -5.2377135359 | 0.9298113309  | -1.2717825807 | H | 1.0 | -3.2135435365 | -1.6885284076 | -2.2664596376 |
| H | 1.0 | -5.3362400508 | -0.8561232941 | -1.1095045615 | H | 1.0 | -1.6767568151 | -0.8268440199 | -2.6180620597 |
| C | 6.0 | -2.9351136093 | -1.5233227970 | -2.2758072759 | H | 1.0 | -3.1350043142 | -0.5324370433 | -3.6216508011 |
| H | 1.0 | -3.3118006292 | -2.3620441325 | -1.6634562064 | C | 6.0 | 0.0065316563  | -3.0098928681 | 0.5224415199  |
| H | 1.0 | -1.8370808944 | -1.6336519816 | -2.3849096800 | H | 1.0 | 0.9756962150  | -3.4163987680 | 0.8596781704  |
| H | 1.0 | -3.3896051061 | -1.6217736155 | -3.2847352792 | C | 1.0 | -0.8345169177 | -3.4383575200 | -1.0969398769 |
| C | 6.0 | 0.0781135270  | -2.8191564650 | 0.9711691400  | H | 6.0 | -0.1780885572 | -2.8802643921 | -0.9899163615 |
| H | 1.0 | 1.0679037940  | -3.1456941638 | 1.3341685617  | H | 1.0 | -1.1941491988 | -3.0341180103 | -1.3928769308 |
| H | 1.0 | -0.7275767465 | -3.1095849114 | 1.6686495605  | H | 1.0 | 0.5879185548  | -3.2977349152 | -1.6679071215 |
| C | 6.0 | -0.1830482567 | -3.0158791657 | -0.5062164134 |   |     |               |               |               |
| H | 1.0 | -1.2136542756 | -3.2756078771 | -0.8051690017 |   |     |               |               |               |
| H | 1.0 | 0.5576038919  | -3.5523244407 | -1.1253251483 |   |     |               |               |               |

## Products of the reactions with ethene

### Transition state TS2T1:

| ATOM | CHARGE | X             | Y             | Z             | P |
|------|--------|---------------|---------------|---------------|---|
| TL   | 15.0   | 2.5278353861  | 0.3430845454  | -0.0293790128 |   |
| P    | 81.0   | 0.0357010825  | -0.7809646832 | -0.1155827161 |   |
| C    | 15.0   | -2.5401027340 | 0.2162267880  | 0.1138584344  |   |
| P    | 6.0    | 3.0866206150  | 0.4629034880  | 1.8383815988  |   |
| C    | 6.0    | 4.3875186861  | 1.2720399812  | 2.0465465658  |   |
| H    | 1.0    | 5.2558668233  | 0.8391045502  | 1.5153437099  |   |
| H    | 1.0    | 4.6305124049  | 1.2597848086  | 3.1313486723  |   |
| H    | 1.0    | 4.2916651896  | 2.3348107158  | 1.7534769997  |   |
| C    | 6.0    | 1.9267505003  | 1.1098402599  | 2.6306668041  |   |
| H    | 1.0    | 0.9871233955  | 0.5354197507  | 2.4833089263  |   |
| H    | 1.0    | 1.7430137057  | 2.1679055340  | 2.3704318997  |   |
| H    | 1.0    | 2.1751027075  | 1.0734273059  | 3.7130105759  |   |
| C    | 6.0    | 3.2722365875  | -0.9613636217 | 2.4075442541  |   |
| H    | 1.0    | 4.1806585780  | -1.4687651786 | 2.0284389866  |   |
| H    | 1.0    | 2.3872004614  | -1.6040801569 | 2.2168124040  |   |
| H    | 1.0    | 3.3873933870  | -0.8804281511 | 3.5099236339  |   |
| C    | 6.0    | 2.6281918678  | 2.1097288752  | -0.8757333118 |   |
| C    | 6.0    | 4.0500367618  | 2.4488095082  | -1.3845111320 |   |
| H    | 1.0    | 4.4036568335  | 1.7772007051  | -2.1878300557 |   |
| H    | 1.0    | 4.8028188634  | 2.4611295108  | -0.5722453999 |   |
| H    | 1.0    | 4.0196917828  | 3.4734582383  | -1.8144136495 |   |
| C    | 6.0    | 2.2109961416  | 3.2443706778  | 0.0875240424  |   |
| H    | 1.0    | 1.2043856146  | 3.1024353372  | 0.5178237827  |   |
| H    | 1.0    | 2.1820923771  | 4.1875715041  | -0.4996220127 |   |
| H    | 1.0    | 2.9301249290  | 3.4056432626  | 0.9126223991  |   |
| C    | 6.0    | 1.6293097097  | 2.1100855856  | -2.0553731056 |   |
| H    | 1.0    | 1.8181626748  | 1.3087525952  | -2.7928135955 |   |
| H    | 1.0    | 1.7000910009  | 3.0839647610  | -2.5867882828 |   |
| H    | 1.0    | 0.5874481179  | 1.9982286979  | -1.6935216452 |   |
| C    | 6.0    | -3.6444970891 | -1.0924902843 | 1.0661992942  |   |
| C    | 6.0    | -2.5704198061 | 1.9047907624  | 1.0801063573  |   |
| H    | 6.0    | -3.8780338029 | -2.3197091217 | 0.1551769672  |   |
| H    | 1.0    | -4.5390816969 | -2.1013388053 | -0.7051704780 |   |
| H    | 1.0    | -4.3846867236 | -3.1038883913 | 0.7578986560  |   |
| H    | 1.0    | -2.9329463650 | -2.7589679500 | -0.2208987245 |   |
| C    | 6.0    | -2.8788158681 | -1.5782785593 | 2.3209229988  |   |
| H    | 1.0    | -2.8590626537 | -0.8312020099 | 3.1342324221  |   |
| H    | 1.0    | -1.8353213402 | -1.8601240634 | 2.0799649231  |   |
| H    | 1.0    | -3.3990417561 | -2.4766837389 | 2.7167514550  |   |
| C    | 6.0    | -5.0143668330 | -0.5199373581 | 1.4970429384  |   |
| H    | 1.0    | -4.9235998643 | 0.3007917661  | 2.2342548892  |   |
| H    | 1.0    | -5.5821252317 | -1.3351414578 | 1.9964710628  |   |
| H    | 1.0    | -5.6306409907 | -0.1667660368 | 0.6490867450  |   |
| C    | 6.0    | -2.3730730078 | 1.6446636558  | 2.5912262211  |   |
| H    | 1.0    | -2.2032893215 | 2.6225858275  | 3.0910794124  |   |
| H    | 1.0    | -1.4884296282 | 1.0075764670  | 2.7949001163  |   |
| H    | 1.0    | -3.2574856988 | 1.1852527345  | 3.0708388096  |   |
| C    | 6.0    | -3.8576447083 | 2.7351804478  | 0.8729469427  |   |
| H    | 1.0    | -3.7673360150 | 3.6649918951  | 1.4756912136  |   |
| H    | 1.0    | -4.7699605373 | 2.2113053892  | 1.2157161504  |   |
| H    | 1.0    | -4.0056378092 | 3.0469939948  | -0.1787396229 |   |
| C    | 6.0    | -1.3468304724 | 2.7137781918  | 0.6068512519  |   |
| H    | 1.0    | -1.2524601185 | 3.6326738501  | 1.2253211692  |   |
| H    | 1.0    | -1.4039957508 | 3.0307413822  | -0.4498746303 |   |

### Product 2B:

| ATOM | CHARGE | X             | Y             | Z             |
|------|--------|---------------|---------------|---------------|
| P    | 15.0   | -2.0166256611 | -0.0173002574 | 0.0170467079  |
| B    | 5.0    | -0.0683826716 | -0.7910626012 | 0.2047693369  |
| P    | 15.0   | 1.9905751734  | -0.0622150245 | 0.0163499317  |
| C    | 6.0    | -2.6728226898 | -0.1851671915 | -1.8389092118 |
| C    | 6.0    | -3.8992540906 | 0.7086157058  | -2.1443805560 |
| H    | 1.0    | -4.7832635844 | 0.4605159639  | -1.5297052786 |
| H    | 1.0    | -4.1850610699 | 0.5351586841  | -3.2045065349 |
| H    | 1.0    | -3.6962503471 | 1.7902796018  | -2.0489552967 |
| C    | 6.0    | -1.5225483224 | 0.1892600877  | -2.7969485006 |
| H    | 1.0    | -0.6210049456 | -0.4270771660 | -2.6107284821 |
| H    | 1.0    | -1.2475944610 | 1.2586082817  | -2.7435690394 |
| H    | 1.0    | -1.8519048044 | -0.0069808498 | -3.8398276713 |
| C    | 6.0    | -3.0856841525 | -1.6383903934 | -2.1831797311 |
| H    | 1.0    | -3.9810538005 | -1.9799744512 | -1.6307129354 |
| H    | 1.0    | -2.713644887  | -2.3721888353 | -2.0403021067 |
| H    | 1.0    | -3.3537386716 | -1.6596638478 | -3.2613472493 |
| C    | 6.0    | -2.1651060399 | 1.8620358424  | 0.5645141988  |
| C    | 6.0    | -3.5700253558 | 2.3968895036  | 0.9355175228  |
| H    | 1.0    | -3.9965178444 | 1.9226417503  | 1.8386897002  |
| H    | 1.0    | -4.3020045945 | 2.3215792317  | 0.1091150068  |
| H    | 1.0    | -3.4781491219 | 3.4781491219  | 1.1691000313  |
| C    | 6.0    | -1.6617333368 | 2.7591890177  | -0.5958404715 |
| H    | 1.0    | -0.7542600668 | 2.3863706465  | -1.0991454197 |
| H    | 1.0    | -1.4242200454 | 3.7657902204  | -0.1904090339 |
| H    | 1.0    | -2.4417309191 | 2.9016700125  | -1.3659276404 |
| C    | 6.0    | -1.2643964998 | 2.0282088773  | 1.8161584621  |
| H    | 1.0    | -1.7649852554 | 1.6791036925  | 2.7377966189  |
| H    | 1.0    | -1.0298819210 | 3.1044234281  | 1.9601139437  |
| H    | 1.0    | -0.3096685415 | 1.4742856847  | 1.7374295472  |
| C    | 6.0    | 2.9183593052  | -1.4488683528 | -1.0597193734 |
| C    | 6.0    | 2.3527293048  | 1.6766153007  | -0.8609833004 |
| C    | 6.0    | 3.0687447269  | -2.7404551916 | -0.2129097535 |
| H    | 1.0    | 3.7664720225  | -2.6028631549 | 0.6355715523  |
| H    | 1.0    | 3.5085243299  | -3.5263037669 | -0.8636115290 |
| H    | 1.0    | 2.1206008051  | -3.1435875389 | 0.1844605312  |
| C    | 6.0    | 2.1044783777  | -1.7413064353 | -2.3494737613 |
| H    | 1.0    | 2.2962432910  | -0.9866364379 | -3.1339846162 |
| H    | 1.0    | 1.0151340432  | -1.9777006307 | -2.1846852778 |
| H    | 1.0    | 2.4334868758  | -2.7201513212 | -2.7605310473 |
| C    | 6.0    | 4.3419471283  | -1.0648022676 | -1.5328696130 |
| H    | 1.0    | 4.3396630314  | -0.2548456445 | -2.2862762967 |
| H    | 1.0    | 4.7651733999  | -1.9585412178 | -2.0411703496 |
| H    | 1.0    | 5.0365557286  | -0.7985236964 | -0.7176833493 |
| C    | 6.0    | 1.8710861412  | 1.5713857556  | -2.3260355951 |
| H    | 1.0    | 1.8913821420  | 2.5875246733  | -2.7744894269 |
| H    | 1.0    | 0.8389962965  | 1.1861267640  | -2.4165299363 |
| H    | 1.0    | 2.5324288744  | 0.9356636786  | -2.9439135359 |
| C    | 6.0    | 3.8365416733  | -2.1213499672 | -0.8812825347 |
| H    | 1.0    | 3.8767026829  | 3.0861325643  | -1.4335440263 |
| H    | 1.0    | 4.5170404     |               |               |

|   |     |               |               |               |   |     |               |               |               |
|---|-----|---------------|---------------|---------------|---|-----|---------------|---------------|---------------|
| H | 1.0 | 2.1960246681  | 3.3293367837  | 0.6091115266  | C | 6.0 | 3.3649485568  | -2.7728345078 | 0.0777744855  |
| H | 1.0 | 0.6538404877  | 2.4935219007  | 0.3390947485  | H | 1.0 | 4.1604622344  | -3.4788026075 | -0.2446883806 |
| C | 6.0 | -3.2852361423 | -1.0300203982 | 1.1751693670  | H | 1.0 | 2.4011131661  | -3.2145548672 | -0.2282789186 |
| C | 6.0 | -3.2312712578 | -2.5776885541 | 1.0497773738  | H | 1.0 | 3.4008477377  | -2.7267935833 | 1.1797541785  |
| H | 1.0 | -4.0591220130 | -2.9706443330 | 1.6785766309  | C | 6.0 | 3.4708198603  | -1.6596346806 | -2.1365208065 |
| H | 1.0 | -2.3017663550 | -3.0351688188 | 1.4276549009  | H | 1.0 | 4.0825879175  | -2.5457619115 | -2.4104277434 |
| H | 1.0 | -3.4159435475 | -2.9446744763 | 0.0249072524  | H | 1.0 | 3.8315096964  | -0.8191144024 | -2.7581302363 |
| C | 6.0 | -2.9933797871 | -0.6682440426 | 2.6523745502  | H | 1.0 | 2.4207057679  | -1.8854438742 | -2.4100384608 |
| H | 1.0 | -3.5904362789 | -1.3449414556 | 3.3005368933  | C | 6.0 | 5.1128223658  | -1.0371723159 | -0.3164603106 |
| H | 1.0 | -3.2947956564 | 0.3644869044  | 2.9080404571  | H | 1.0 | 5.7644673853  | -1.7971469910 | -0.8000439817 |
| H | 1.0 | -1.9286202402 | -0.8004944629 | 2.9253467160  | H | 1.0 | 5.3420468145  | -1.0701949278 | 0.7663871306  |
| C | 6.0 | -4.7513988910 | -0.6485513127 | 0.8420987775  | H | 1.0 | 5.4173161194  | -0.0511541469 | -0.7105901722 |
| H | 1.0 | -5.3948524701 | -1.0751941020 | 1.6418249341  | C | 6.0 | -2.9286880123 | 0.3428381041  | -1.8072069738 |
| H | 1.0 | -5.0960528353 | -1.0960985133 | -0.1099735759 | C | 6.0 | -2.3237327369 | 1.6607745945  | -2.3456860998 |
| H | 1.0 | -4.9495897057 | 0.4347791386  | 0.8151989454  | H | 1.0 | -2.7722309346 | 2.5663332920  | -1.8950125335 |
| C | 6.0 | 2.9039579157  | 0.0644220393  | 1.7935570250  | H | 1.0 | -2.5201135951 | 1.7100331897  | -3.4381120756 |
| C | 6.0 | 2.5878643336  | 1.4314937170  | 2.4430351051  | H | 1.0 | -1.2234993567 | 1.7059073816  | -2.2159952340 |
| H | 1.0 | 3.0875038173  | 2.2775275150  | 1.9395614276  | C | 6.0 | -4.4615417074 | 0.3864833260  | -2.0052066926 |
| H | 1.0 | 2.9704919496  | 1.4103902968  | 3.4858578653  | H | 1.0 | -4.6645079443 | 0.5879773036  | -3.0749699363 |
| H | 1.0 | 1.5025801420  | 1.6407138572  | 2.5041042822  | H | 1.0 | -4.9593943247 | 1.1858916685  | -1.4249019245 |
| C | 6.0 | 4.4422886894  | -0.0605711785 | 1.6648735941  | H | 1.0 | -4.9478945124 | -0.5786382922 | -1.7668900160 |
| H | 1.0 | 4.8798104624  | 0.1661773166  | 2.6616717688  | C | 6.0 | -2.3496372959 | -0.8019293073 | -2.6735748041 |
| H | 1.0 | 4.8946854700  | 0.6462415645  | 0.9476018225  | H | 1.0 | -2.7615575858 | -1.7959886080 | -2.4191324758 |
| H | 1.0 | 4.7690215731  | -1.0853666201 | 1.4054611409  | H | 1.0 | -1.2453070916 | -0.8689730465 | -2.6024129749 |
| C | 6.0 | 2.4512788097  | -1.0037166492 | 2.8157761680  | H | 1.0 | -2.6164080532 | -0.5993023240 | -3.7334540002 |
| H | 1.0 | 2.6469935225  | -2.0428326931 | 2.4902520910  | C | 6.0 | 0.0303128107  | -2.8088919803 | 0.7218268452  |
| H | 1.0 | 1.3857384380  | -0.9039419477 | 3.0920490563  | H | 1.0 | 0.9512076136  | -3.2252803453 | 1.1656114630  |
| H | 1.0 | 3.0504593989  | -0.8435998510 | 3.7379739169  | H | 1.0 | -0.8564657192 | -3.2448913753 | 1.2150150515  |
| C | 6.0 | -0.2769922723 | -2.3480016040 | -0.1970605215 | C | 6.0 | -0.0332847197 | -2.7098980867 | -0.8144317750 |
| H | 1.0 | -1.2894819467 | -2.6781377476 | -0.4665369848 | H | 1.0 | -0.9706087261 | -3.0671318483 | -1.2782212305 |
| H | 1.0 | 0.4710962651  | -2.9590348170 | -0.7211265676 | H | 1.0 | 0.8292828544  | -3.1023611033 | -1.3849876531 |
| C | 6.0 | -0.0234038940 | -2.0165754432 | 1.2472788722  |   |     |               |               |               |
| H | 1.0 | 0.9587698452  | -2.3376600378 | 1.6108287601  |   |     |               |               |               |
| H | 1.0 | -0.7913796161 | -2.1936620986 | 2.0147536028  |   |     |               |               |               |

### Product 2Ga:

| ATOM | CHARGE | X             | Y              | Z             |
|------|--------|---------------|----------------|---------------|
| P    | 15.0   | 2.3591960797  | 0.1055500938   | 0.0058713502  |
| GA   | 31.0   | 0.0472092193  | -0.8418724199  | -0.2028113791 |
| P    | 15.0   | -2.3483649866 | 0.0824941546   | -0.0158626248 |
| C    | 6.0    | 2.8436161048  | 0.2036779344   | 1.9043714682  |
| C    | 6.0    | 4.0839119964  | 1.0848572490   | 2.1775515739  |
| H    | 1.0    | 4.9914470226  | 0.7276148738   | 1.6557013837  |
| H    | 1.0    | 4.3012072746  | 1.0464654453   | 3.2671605667  |
| H    | 1.0    | 3.9299701211  | 2.1500932543   | 1.9211068927  |
| C    | 6.0    | 1.6293515326  | 0.7516348235   | 2.6869439300  |
| H    | 1.0    | 0.7268733687  | 0.1254079432   | 2.5216306812  |
| H    | 1.0    | 1.3883756104  | 1.8025849182   | 2.4453955837  |
| H    | 1.0    | 1.8627923934  | 0.7111816274   | 3.7726542934  |
| C    | 6.0    | 3.1170504777  | -1.2181840582  | 2.4472302207  |
| H    | 1.0    | 4.0664516176  | -1.6484625583  | 2.0751651412  |
| H    | 1.0    | 2.2863016079  | -1.917598954   | 2.2284471583  |
| H    | 1.0    | 3.2088456960  | -1.1500295537  | 3.5526383605  |
| C    | 6.0    | 2.4707096279  | 1.8850824700   | -0.7977282542 |
| C    | 6.0    | 3.9011780875  | 2.3443692585   | -1.1646086213 |
| H    | 1.0    | 4.3578814973  | 1.7416061306   | -1.9722016023 |
| H    | 1.0    | 4.5882514187  | 2.3591322012   | -0.2969882244 |
| H    | 1.0    | 3.8342706350  | 3.3869860128   | -1.5444338583 |
| C    | 6.0    | 1.8900376339  | 2.9345077995   | 0.1800009507  |
| H    | 1.0    | 0.9101254733  | 2.6489482647   | 0.6026783514  |
| H    | 1.0    | 1.7413771619  | 3.8853204158   | -0.3757851117 |
| H    | 1.0    | 2.5738514179  | 3.1571932566   | 1.0208495367  |
| C    | 6.0    | 1.6164518225  | 1.8724832957   | -2.0895460058 |
| H    | 1.0    | 2.0724644514  | 1.2701954078   | -2.8954092227 |
| H    | 1.0    | 1.5183083142  | 2.9133572493   | -2.4663269525 |
| H    | 1.0    | 0.5936925495  | 1.4767139171   | -1.9232048414 |
| C    | 6.0    | -3.2262625168 | -1.021761809   | 3.359831123   |
| C    | 6.0    | -2.4918505045 | 1.9627317565   | 0.4988706517  |
| C    | 6.0    | -3.4625337965 | -2.4397782206  | 0.7831759202  |
| H    | 1.0    | -4.2532589674 | -2.4635608939  | 0.0088869723  |
| H    | 1.0    | -3.8077785724 | -3.0896763542  | 1.6158704932  |
| H    | 1.0    | -2.5484375984 | -2.9040143903  | 0.3672436886  |
| C    | 6.0    | -2.2819604096 | -1.1480455168  | 2.5797314092  |
| H    | 1.0    | -2.1999821278 | -0.2073418471  | 3.1536492733  |
| H    | 1.0    | -1.2662220712 | -1.4769398179  | 2.2861272666  |
| H    | 1.0    | -2.7073987718 | -1.91292042315 | 3.2643634674  |
| C    | 6.0    | -4.5780463800 | -0.4588059923  | 1.8413059076  |
| H    | 1.0    | -4.4714466067 | 0.4839146187   | 2.4125068689  |
| H    | 1.0    | -5.0209744911 | -1.2027162215  | 2.5385953754  |
| H    | 1.0    | -5.3110815130 | -0.3013127837  | 1.0283969411  |
| C    | 6.0    | -1.9733328444 | 2.1137768646   | 1.9478026732  |
| H    | 1.0    | -1.9989167514 | 3.1979414215   | 2.1804432782  |
| H    | 1.0    | -0.9665912957 | 1.6734440833   | 2.0907262626  |
| H    | 1.0    | -2.6577868875 | 1.6719807042   | 2.6964709010  |
| C    | 6.0    | -3.9232319619 | 2.5428665284   | 0.4169767351  |
| H    | 1.0    | -3.8817598902 | 3.6002213787   | 0.7588999498  |
| H    | 1.0    | -4.653530761  | 2.0209462480   | 1.0606019001  |
| H    | 1.0    | -4.3149929588 | 2.5606367126   | -0.6181251255 |
| C    | 6.0    | -1.5912752625 | 2.8151418719   | -0.4220334201 |
| H    | 1.0    | -1.4456534610 | 3.8112124526   | 0.0481570557  |
| H    | 1.0    | -2.0325996469 | 2.9877438960   | -1.4180072022 |
| H    | 1.0    | -0.5935154810 | 2.3678880341   | -0.5679110435 |
| C    | 6.0    | 3.6197341490  | -1.0766343027  | -0.9347260519 |
| C    | 6.0    | 3.4073450445  | -2.5634504276  | -0.5652137121 |
| H    | 1.0    | 4.1402608279  | -3.1558426178  | -1.1541588507 |
| H    | 1.0    | 2.4050203676  | -2.9332066325  | -0.8338555059 |

### Product 2Al:

| ATOM | CHARGE | X             | Y             | Z             |
|------|--------|---------------|---------------|---------------|
| P    | 15.0   | 2.3935198957  | -0.0111467665 | -0.0302412160 |
| AL   | 13.0   | 0.0148912107  | -0.9309085796 | 0.0667650692  |
| P    | 15.0   | -2.3745782155 | 0.0817730360  | 0.0591659867  |
| C    | 6.0    | 2.8813807763  | 0.5646250923  | 1.7714471834  |
| C    | 6.0    | 4.1503100119  | 1.4429977926  | 1.8385162435  |
| H    | 1.0    | 5.0564936105  | 0.9222451630  | 1.4783352543  |
| H    | 1.0    | 4.3299777202  | 1.7150677090  | 2.9013757896  |
| H    | 1.0    | 4.0466386336  | 2.3929202221  | 1.2789195801  |
| C    | 6.0    | 1.6885437320  | 1.3528554208  | 2.3565216978  |
| H    | 1.0    | 0.7507325975  | 0.7558479964  | 2.3163831744  |
| H    | 1.0    | 1.5187141162  | 2.3232464426  | 1.8562418115  |
| H    | 1.0    | 1.8912412201  | 1.5661572245  | 3.4281107507  |
| C    | 6.0    | 3.0693578754  | -0.6849458463 | 2.6647009325  |
| H    | 1.0    | 3.9838664997  | -1.2553792423 | 2.4167674393  |
| H    | 1.0    | 2.1916606344  | -1.3632475582 | 2.6256014123  |
| H    | 1.0    | 3.1773854562  | -0.3429325285 | 3.7166257045  |
| C    | 6.0    | 2.5478234384  | 1.4792564274  | -1.2913751671 |
| C    | 6.0    | 3.9896798322  | 1.8047803581  | -1.7421058340 |
| H    | 1.0    | 4.4568153950  | 0.9925043297  | -2.3295649731 |
| H    | 1.0    | 4.6585551318  | 2.0622138142  | -0.8984185010 |
| H    | 1.0    | 3.9452725076  | 2.6959175849  | -2.4054109175 |
| C    | 6.0    | 1.9474707919  | 2.7611698326  | -0.6751170116 |
| H    | 1.0    | 0.9097499838  | 2.6175721283  | -0.3247591894 |
| H    | 1.0    | 1.9167894365  | 3.5424517840  | -1.4648855162 |
| H    | 1.0    | 2.5505492211  | 3.1705964808  | 0.1580751767  |
| C    | 6.0    | 1.6887981196  | 1.1193010581  | -2.5262424944 |
| H    | 1.0    | 2.0836823916  | 0.2693382295  | -3.1108613055 |
| H    | 1.0    | 1.6437146301  | 1.9982000373  | -3.2055042396 |
| H    | 1.0    | 0.6480704367  | 0.8650076721  | -2.2361776677 |
| C    | 6.0    | -3.5350608985 | -1.2665092956 | 0.9070234158  |
| C    | 6.0    | -2.6022879197 | 1.7568955562  | 1.0352050062  |
| H    | 1.0    | -3.6131238612 | -2.5152086559 | -0.0032630107 |
| H    | 1.0    | -4.1224968416 | -2.3202598234 | -0.9665095921 |
| H    | 1.0    | -4.2143993352 | -3.2842693822 | 0.5272495867  |
| H    | 1.0    | -2.6245345510 | -2.9657967668 | -0.2126635849 |
| C    | 6.0    | -2.9277558098 | -1.6917561883 | 2.2697517784  |
| H    | 1.0    | -3.1565017648 | -0.9760217693 | 3.0786492100  |
| H    | 1.0    | -1.8314741758 | -1.8338204015 | 2.2249432262  |
| H    | 1.0    | -3.3805004616 | -2.6630647296 | 2.5642789514  |
| C    | 6.0    | -4.9756583262 | -0.7635612903 | 1.1616495208  |
| H    | 1.0    | -5.0213230464 | 0.0554148053  | 1.9049942230  |
| H    | 1.0    | -5.5521448037 | -1.6116564014 | 1.5910099538  |
| H    | 1.0    | -5.5056937879 | -0.4421921191 | 0.2466570663  |
| C    | 6.0    | -2.4309184079 | 1.4854745068  | 2.5560311557  |
| H    | 1.0    | -2.5352800209 | 2.4620047505  | 3.0777968377  |
| H    | 1.0    | -1.6527715714 | 0.8713935063  | 2.8429499557  |
| H    | 1.0    | -3.4431547976 | 0.9990169392  | 2.9485863857  |
| C    | 6.0    | -3.9292414007 | 2.4831142999  | 0.7158852753  |
| H    | 1.0    | -4.0061202215 | 3.3740840630  | 1.3765934587  |
| H    | 1.0    | -4.8236393883 | 1.8616962220  | 0.9048927308  |
| H    | 1.0    | -3.9760852872 | 2.8549531786  | -0.3256472547 |
| C    | 6.0    | -1.4257067790 | 2.6935950063  | 0.6976366069  |
| H    | 1.0    |               |               |               |

|   |     |               |               |               |
|---|-----|---------------|---------------|---------------|
| H | 1.0 | 3.5949256143  | -2.7856099746 | 0.4992234294  |
| C | 6.0 | 3.3692079966  | -0.9463647537 | -2.4566545551 |
| H | 1.0 | 3.9704468467  | -1.7246423647 | -2.9739297187 |
| H | 1.0 | 3.6877942643  | 0.0293538793  | -2.8699308567 |
| H | 1.0 | 2.3057344560  | -1.1207370255 | -2.7203231590 |
| C | 6.0 | 5.0925782226  | -0.7332902317 | -0.6059907988 |
| H | 1.0 | 5.7368435390  | -1.3744915343 | -1.2458787137 |
| H | 1.0 | 5.3497563151  | -0.9714954866 | 0.4440735549  |
| H | 1.0 | 5.3708564629  | 0.3151494183  | -0.8103038995 |
| C | 6.0 | -3.2810143569 | -0.1508852641 | -1.7348574401 |
| C | 6.0 | -2.8539440951 | 0.9659355084  | -2.7148061511 |
| H | 1.0 | -3.2882466866 | 1.9535246694  | -2.4693232199 |
| H | 1.0 | -3.2298487624 | 0.6940258860  | -3.7242994087 |
| H | 1.0 | -1.7514970436 | 1.0618461084  | -2.7951369876 |
| C | 6.0 | -4.8205692254 | -0.1289758972 | -1.5855395930 |
| H | 1.0 | -5.2578686389 | -0.1650326128 | -2.6067923462 |
| H | 1.0 | -5.2090502235 | 0.7836059867  | -1.0972417029 |
| H | 1.0 | -5.2090690308 | -1.0124768225 | -1.0434583335 |
| C | 6.0 | -2.8691565926 | -1.4836776700 | -2.3983093269 |
| H | 1.0 | -3.0940093906 | -2.3728147694 | -1.7822369465 |
| H | 1.0 | -1.7931899344 | -1.4948023459 | -2.6562682770 |
| H | 1.0 | -3.4471896024 | -1.5856504151 | -3.3420066159 |
| C | 6.0 | 0.1440417055  | -2.7461309950 | 0.4938055984  |
| H | 1.0 | 1.1174074578  | -3.1026917388 | 0.8725213341  |
| H | 1.0 | -0.6794981445 | -3.2095300360 | 1.0643955667  |
| C | 6.0 | -0.0176334324 | -2.6814908831 | -1.0252756065 |
| H | 1.0 | -0.9938600989 | -3.0091553540 | -1.4165277210 |
| H | 1.0 | 0.7954155646  | -3.0575681968 | -1.6710349240 |

|   |     |               |               |               |
|---|-----|---------------|---------------|---------------|
| H | 1.0 | 3.7613155219  | -0.5045693815 | -2.9476874878 |
| H | 1.0 | 2.3442770544  | -1.5501944727 | -2.5616048250 |
| C | 6.0 | 5.1660801973  | -0.9037014041 | -0.5599733721 |
| H | 1.0 | 5.7636646353  | -1.6835052270 | -1.0802674276 |
| H | 1.0 | 5.4201930713  | -0.9744719016 | 0.5156136396  |
| H | 1.0 | 5.5077192892  | 0.0753944029  | -0.9401119464 |
| C | 6.0 | -3.2252322346 | 0.0760976422  | -1.7270979519 |
| C | 6.0 | -2.6039800065 | 1.2233996301  | -2.5561222984 |
| H | 1.0 | -2.9369482880 | 2.2300751964  | -2.2401850406 |
| H | 1.0 | -2.9197786797 | 1.0933719199  | -3.6134976238 |
| H | 1.0 | -1.4944006040 | 1.1898737473  | -2.5477055692 |
| C | 6.0 | -4.7664749250 | 0.1887448516  | -1.7679441296 |
| H | 1.0 | -5.0832020891 | 0.2357634005  | -2.8327965577 |
| H | 1.0 | -5.1600492887 | 1.0959644716  | -1.2729029182 |
| H | 1.0 | -5.2669085127 | -0.6968178813 | -1.3299993599 |
| C | 6.0 | -2.8031916842 | -1.2414601054 | -2.4203316160 |
| H | 1.0 | -3.2176790143 | -2.1462023493 | -1.9404920196 |
| H | 1.0 | -1.7005333038 | -1.3494845162 | -2.4733617730 |
| H | 1.0 | -3.1933062693 | -1.2174488742 | -3.4606783365 |
| C | 6.0 | 0.0345079749  | -2.8638056460 | 0.8632426498  |
| H | 1.0 | 0.9940379456  | -3.2228434814 | 1.2728262453  |
| H | 1.0 | -0.8147091104 | -3.1810032226 | 1.4940412794  |
| C | 6.0 | -0.1489578886 | -2.9502013201 | -0.6423943357 |
| H | 1.0 | -1.1488706155 | -3.2341672648 | -1.0151710306 |
| H | 1.0 | 0.6448118306  | -3.4195457543 | -1.2504326710 |

### Product 2In:

|    | ATOM | CHARGE        | X             | Y             | Z |
|----|------|---------------|---------------|---------------|---|
| P  | 15.0 | 2.4945633802  | 0.2057129339  | -0.1230818093 |   |
| IN | 49.0 | 0.0244947070  | -0.8140447214 | -0.0512536080 |   |
| P  | 15.0 | -2.4919802325 | 0.1382872202  | 0.0956693435  |   |
| C  | 6.0  | 3.0115867520  | 0.6683303606  | 1.7029810593  |   |
| C  | 6.0  | 4.3111435096  | 1.5014714016  | 1.7823709487  |   |
| H  | 1.0  | 5.1883245762  | 0.9717954477  | 1.3661392321  |   |
| H  | 1.0  | 4.5310182847  | 1.7072798634  | 2.8524036079  |   |
| H  | 1.0  | 4.2234347638  | 2.4826973034  | 1.2781066166  |   |
| C  | 6.0  | 1.8467978910  | 1.4590735175  | 2.3415830640  |   |
| H  | 1.0  | 0.8982706564  | 0.8799409465  | 2.3001138526  |   |
| H  | 1.0  | 1.6832845310  | 2.4505837997  | 1.8819423535  |   |
| H  | 1.0  | 2.0819625239  | 1.6291412620  | 3.4142891375  |   |
| C  | 6.0  | 3.1822611026  | -0.6287145216 | 2.5266938730  |   |
| H  | 1.0  | 4.0799794888  | -1.2059030520 | 2.2346921463  |   |
| H  | 1.0  | 2.2877297664  | -1.2835934550 | 2.4679581129  |   |
| H  | 1.0  | 3.3139582056  | -0.3435645139 | 3.5926921964  |   |
| C  | 6.0  | 2.6422238037  | 1.7728226970  | -1.2972675671 |   |
| C  | 6.0  | 4.0866730448  | 2.0356632320  | -1.7869076061 |   |
| H  | 1.0  | 4.4930258024  | 1.2271719040  | -2.4220943226 |   |
| H  | 1.0  | 4.7920811735  | 2.2195101806  | -0.9530051936 |   |
| H  | 1.0  | 4.0710640068  | 2.9565446008  | -2.4091410560 |   |
| C  | 6.0  | 2.1641029548  | 3.0570430178  | -0.5831860865 |   |
| H  | 1.0  | 1.1405289530  | 2.9666455578  | -0.1806204628 |   |
| H  | 1.0  | 2.1451351113  | 3.8775945566  | -1.3325212656 |   |
| H  | 1.0  | 2.8416223091  | 3.3804617545  | 0.2291942560  |   |
| C  | 6.0  | 1.7161281007  | 1.5446433719  | -2.5159558955 |   |
| H  | 1.0  | 1.9826788754  | 0.6498098268  | -3.1060221574 |   |
| H  | 1.0  | 1.7962804939  | 2.4281649716  | -3.1848330786 |   |
| H  | 1.0  | 0.6525216282  | 1.4455117883  | -2.2145256846 |   |
| C  | 6.0  | -3.5309881454 | -1.0316328172 | 1.2772294001  |   |
| C  | 6.0  | -2.5808622416 | 1.9613051657  | 0.7731075584  |   |
| C  | 6.0  | -3.7016249635 | -2.4132892752 | 0.6055309135  |   |
| H  | 1.0  | -4.3549556934 | -2.3810801670 | -0.2873438289 |   |
| H  | 1.0  | -4.1895090859 | -3.0919507740 | 1.3375247370  |   |
| H  | 1.0  | -2.7369210379 | -2.8783264670 | 0.3251954348  |   |
| C  | 6.0  | -2.7632419083 | -1.2337967303 | 2.6083307113  |   |
| H  | 1.0  | -2.8161238429 | -0.3504305356 | 3.2675622573  |   |
| H  | 1.0  | -1.6965200774 | -1.4913386979 | 2.4519655839  |   |
| H  | 1.0  | -3.2381416401 | -2.0755985840 | 3.1570952894  |   |
| C  | 6.0  | -4.9325678969 | -0.4603335613 | 1.5972841659  |   |
| H  | 1.0  | -4.8919548937 | 0.5000970650  | 2.1462374724  |   |
| H  | 1.0  | -5.4504785411 | -1.1853592576 | 2.2622747961  |   |
| H  | 1.0  | -5.5684716046 | -0.3286625881 | 0.7025034383  |   |
| C  | 6.0  | -2.4114636944 | 1.9750651124  | 2.3095752032  |   |
| H  | 1.0  | -2.2698962542 | 3.0307493859  | 2.6274144432  |   |
| H  | 1.0  | -1.5198030344 | 1.4076137120  | 2.6446657388  |   |
| H  | 1.0  | -3.2993427757 | 1.5951282430  | 2.8494214152  |   |
| C  | 6.0  | -3.8836426564 | 2.7094601878  | 0.4093868115  |   |
| H  | 1.0  | -3.8534490218 | 3.7110826945  | 0.8912845467  |   |
| H  | 1.0  | -4.7941348462 | 2.1998225718  | 0.7782283813  |   |
| H  | 1.0  | -3.9933597139 | 2.8819574611  | -0.6781893218 |   |
| C  | 6.0  | -1.3673298876 | 2.7155708295  | 0.1950300700  |   |
| H  | 1.0  | -1.3756096940 | 3.7637506827  | 0.5652639557  |   |
| H  | 1.0  | -1.3459255040 | 2.7508693116  | -0.9091821214 |   |
| C  | 6.0  | -0.4283238713 | 2.2477988177  | 0.5518504402  |   |
| C  | 6.0  | 3.6711109845  | -1.2020993548 | -0.8249145473 |   |
| C  | 6.0  | 3.3414825741  | -2.5685420089 | -0.1800656530 |   |
| H  | 1.0  | 4.0596982322  | -3.3109530839 | -0.5900611202 |   |
| H  | 1.0  | 2.3310453125  | -2.9222058889 | -0.4459482655 |   |
| H  | 1.0  | 3.4495759878  | -2.5836582451 | 0.9178584383  |   |
| C  | 6.0  | 3.4160390725  | -1.3635544058 | -2.3422348017 |   |
| H  | 1.0  | 3.9837219258  | -2.2522594268 | -2.6927785000 |   |

### Product 2II:

|    | ATOM | CHARGE        | X             | Y             | Z |
|----|------|---------------|---------------|---------------|---|
| P  | 15.0 | 2.5278353861  | 0.3430845454  | -0.0293790128 |   |
| TL | 81.0 | 0.0357010825  | -0.7809646832 | -0.1155827161 |   |
| P  | 15.0 | -2.5401027340 | 0.2162267880  | 0.1138584344  |   |
| C  | 6.0  | 3.0866206150  | 0.4629034880  | 1.8383815988  |   |
| C  | 6.0  | 4.3875186861  | 1.2720399812  | 2.0465465658  |   |
| H  | 1.0  | 5.2558668233  | 0.8391045502  | 1.5153437099  |   |
| H  | 1.0  | 4.6305124049  | 1.2597848086  | 3.1313486723  |   |
| H  | 1.0  | 4.2916651896  | 2.3348107158  | 1.7534769997  |   |
| C  | 6.0  | 1.9267505003  | 1.1098402599  | 2.630668041   |   |
| H  | 1.0  | 0.9871233955  | 0.5354197507  | 2.4833089263  |   |
| H  | 1.0  | 1.7430137057  | 2.1679055340  | 2.3704318997  |   |
| H  | 1.0  | 2.1751027075  | 1.0734273059  | 3.17130105759 |   |
| C  | 6.0  | 3.2722365875  | -0.9613636217 | 2.4075442541  |   |
| H  | 1.0  | 4.1806585780  | -1.4687651786 | 2.0284389866  |   |
| H  | 1.0  | 2.3872004614  | -1.6048001569 | 2.2168124040  |   |
| H  | 1.0  | 3.3873933870  | -0.8804281511 | 3.5099236339  |   |
| C  | 6.0  | 2.6281918678  | 2.1097288752  | -0.8757333118 |   |
| C  | 6.0  | 4.0500367618  | 2.4488095082  | -1.3845111320 |   |
| H  | 1.0  | 4.4036568335  | 1.7772007051  | -2.1878300557 |   |
| H  | 1.0  | 4.8028188634  | 2.4611295108  | -0.5722453999 |   |
| H  | 1.0  | 4.0196917828  | 3.4734582383  | -1.8144136495 |   |
| C  | 6.0  | 2.2109961416  | 3.2443706778  | 0.0875240424  |   |
| H  | 1.0  | 1.2043856146  | 3.1024353372  | 0.5178237827  |   |
| H  | 1.0  | 2.1820923771  | 4.1875715041  | -0.4996220127 |   |
| H  | 1.0  | 2.9301249290  | 3.4056432626  | 0.9126223991  |   |
| C  | 6.0  | 1.6293097097  | 2.1100855856  | -0.0553731056 |   |
| H  | 1.0  | 1.8181826958  | 2.1307525952  | -2.7928135955 |   |
| H  | 1.0  | 1.7000910009  | 3.0839647610  | -2.5867882828 |   |
| H  | 1.0  | 0.5874481179  | 1.9982286979  | -1.6935216452 |   |
| C  | 6.0  | -3.6444970891 | -1.0924902843 | 1.0661992942  |   |
| C  | 6.0  | -2.5704198061 | 1.9047907624  | 1.0801063573  |   |
| C  | 6.0  | -3.8780338029 | -2.3197091217 | 0.1551769672  |   |
| H  | 1.0  | -4.5390816969 | -2.1013388053 | -0.7051704780 |   |
| H  | 1.0  | -4.3846867236 | -3.1038883913 | 0.7578986560  |   |
| H  | 1.0  | -2.9329463650 | -2.7589679500 | -0.2208987245 |   |
| C  | 6.0  | -2.8788158681 | -2.7582285593 | 2.3209229988  |   |
| H  | 1.0  | -2.8590626537 | -0.8312020099 | 3.1342324221  |   |
| H  | 1.0  | -1.8353213402 | -1.8601240634 | 2.0799649231  |   |
| H  | 1.0  | -3.3990417561 | -2.4766837389 | 2.7167514550  |   |
| C  | 6.0  | -5.0143668330 | -0.5199373581 | 1.4970429384  |   |
| H  | 1.0  | -4.9235998643 | 0.3007917661  | 2.2342548892  |   |
| H  | 1.0  | -5.5821252317 | -1.3351414578 | 1.9964710628  |   |
| H  | 1.0  | -5.6306409907 | -0.1667660368 | 0.6490867450  |   |
| C  | 6.0  | -2.3730730078 | 1.6446636558  | 2.5912226211  |   |
| H  | 1.0  | -2.2032893215 | 2.6225858275  | 3.0910794124  |   |
| H  | 1.0  | -1.4884296282 | 1.0075764670  | 2.7949001163  |   |
| H  | 1.0  | -3.2574856988 | 1.1852527345  | 3.0708388096  |   |
| C  | 6.0  | -3.8576447083 | 2.7351804478  | 0.8729469427  |   |
| H  | 1.0  | -3.7673360150 | 3.6649918951  | 1.4756912136  |   |
| H  | 1.0  | -4.7699605373 | 2.2113053892  | 1.2157161504  |   |
| H  | 1.0  | -4.0056378092 | 3.0469939948  | -0.1787396229 |   |
| C  | 6.0  | -1.3468304724 | 2.7137781918  | 0.6068512519  |   |
| H  | 1.0  | -1.252        |               |               |   |

|   |     |               |               |               |
|---|-----|---------------|---------------|---------------|
| H | 1.0 | 5.7521956566  | -1.3703237584 | -1.3758855246 |
| H | 1.0 | 5.4424147215  | -0.8880177602 | 0.3099303084  |
| H | 1.0 | 5.5192162681  | 0.3552550988  | -0.9873109698 |
| C | 6.0 | -3.2194821773 | 0.4712201558  | -1.7054210308 |
| C | 6.0 | -2.5735540102 | 1.7316109661  | -2.3242129815 |
| H | 1.0 | -2.9103149119 | 2.6771059766  | -1.8572624549 |
| H | 1.0 | -2.8685127103 | 1.7769471397  | -3.3945812600 |
| H | 1.0 | -1.4658191678 | 1.6857654654  | -2.2950412249 |
| C | 6.0 | -4.7582554181 | 0.6114896143  | -1.7606758302 |
| H | 1.0 | -5.0460764583 | 0.8328947991  | -2.8113349739 |
| H | 1.0 | -5.1461374806 | 1.4377106393  | -1.1350848503 |
| H | 1.0 | -5.2813375717 | -0.3219103344 | -1.4765950449 |
| C | 6.0 | -2.7809418061 | -0.7233841837 | -2.5854689622 |
| H | 1.0 | -3.2135435365 | -1.6885284076 | -2.2664596376 |
| H | 1.0 | -1.6767568151 | -0.8268440199 | -2.6180620597 |
| H | 1.0 | -3.1350043142 | -0.5324370433 | -3.6216508011 |
| C | 6.0 | 0.0065316563  | -3.0098928681 | 0.5224415199  |
| H | 1.0 | 0.9756962150  | -3.4163987680 | 0.8596781704  |
| H | 1.0 | -0.8345169177 | -3.4383575200 | 1.0969389769  |
| C | 6.0 | -0.1780885572 | -2.8802643921 | -0.9899163615 |
| H | 1.0 | -1.1941491988 | -3.0341180103 | -1.3928769308 |
| H | 1.0 | 0.5879185548  | -3.2977349152 | -1.6679071215 |
